# Supplementary material for: The neuroendocrine phenotype, genomic profile and therapeutic sensitivity of GEPNET cell lines
Source: PubMed Central journal article supplement (PMC5827037; doi:10.1530/erc-17-0445), 2018-01-15
Supplement: erc-25-309-t003.pdf [file erc-25-309-t003.pdf]

Supplementary Table 3. Filtered indel mutations.

| Annotation           | Gene     | Chr   | Position 1 | Position 2 | Ref  | GOT1  | P-ST5    | BON1                                     | QGP-1 |
|----------------------|----------|-------|------------|------------|------|-------|----------|------------------------------------------|-------|
| frameshift insertion | ABCA8    | chr17 | 66924065   | 66924065   | -    | -     | T_het    | -                                        | -     |
| frameshift insertion | ABCC10   | chr6  | 43409640   | 43409640   | -    | -     | T_het    | -                                        | -     |
| frameshift deletion  | ABCD4    | chr14 | 74754567   | 74754567   | C    | C     | -_het    | C                                        | C     |
| frameshift insertion | ABL2     | chr1  | 179086419  | 179086419  | -    | A_het | -        | -                                        | -     |
| frameshift deletion  | ABL2     | chr1  | 179086420  | 179086420  | A    | A     | -_hom    | A                                        | A     |
| frameshift insertion | ACAD9    | chr3  | 128617302  | 128617302  | -    | -     | -        | CAGTGGCACGA<br>TCTTGGCTCACT<br>GCAGC_hom | -     |
| frameshift deletion  | ACBD3    | chr1  | 226352491  | 226352492  | TT   | TT    | -_het    | TT                                       | TT    |
| frameshift insertion | ACOT4    | chr14 | 74060511   | 74060511   | -    | -     | TCAA_hom | -                                        | -     |
| frameshift deletion  | ACOT4    | chr14 | 74060514   | 74060517   | CTTA | CTTA  | -_hom    | CTTA                                     | CTTA  |
| frameshift deletion  | ACVR2A   | chr2  | 148683686  | 148683686  | A    | A     | -_hom    | A                                        | A     |
| frameshift deletion  | ADAM11   | chr17 | 42837126   | 42837126   | G    | G     | -_het    | G                                        | G     |
| frameshift deletion  | ADAMTSL1 | chr9  | 18826262   | 18826262   | T    | -_het | -_het    | -_hom                                    | -_hom |
| frameshift insertion | ADD3     | chr10 | 111877100  | 111877100  | -    | -     | -        | -                                        | T_het |
| frameshift deletion  | ADD3     | chr10 | 111893350  | 111893350  | A    | A     | -_het    | A                                        | A     |

|                      |          |       |           |           |                                           |                                               |                                               |                    |                                           |
|----------------------|----------|-------|-----------|-----------|-------------------------------------------|-----------------------------------------------|-----------------------------------------------|--------------------|-------------------------------------------|
| frameshift deletion  | ADRA2B   | chr2  | 96780921  | 96780921  | G                                         | G                                             | -_het                                         | G                  | G                                         |
| frameshift insertion | AF035281 | chr7  | 148991542 | 148991542 | -                                         | -                                             | G_het                                         | -                  | -                                         |
| frameshift deletion  | AFF3     | chr2  | 100722134 | 100722134 | T                                         | T                                             | -_het                                         | T                  | T                                         |
| frameshift deletion  | AGAP6    | chr10 | 51769223  | 51769236  | GCAGTCATGCGA<br>GA                        | GCAGTCATGCG<br>AGA                            | GCAGTCATGCG<br>AGA                            | GCAGTCATGCG<br>AGA | -_het                                     |
| frameshift deletion  | AHNAK2   | chr14 | 105404586 | 105404586 | A                                         | -_het                                         | A                                             | A                  | A                                         |
| frameshift deletion  | AHNAK2   | chr14 | 105416448 | 105416448 | G                                         | G                                             | -_het                                         | G                  | G                                         |
| frameshift deletion  | AIM1L    | chr1  | 26671523  | 26671535  | AAATGAGGCATC<br>A                         | AAATGAGGCAT<br>CA                             | AAATGAGGCAT<br>CA                             | -_hom              | AAATGAGGCATC<br>A                         |
| frameshift deletion  | AIM1L    | chr1  | 26671539  | 26671542  | GCAC                                      | GCAC                                          | GCAC                                          | -_hom              | GCAC                                      |
| frameshift deletion  | AIM1L    | chr1  | 26671545  | 26671578  | GGGCCCTTCACG<br>ACCTCTTCCAGG<br>TGGGGAACA | GGGCCCTTCAC<br>GACCTCTTCCA<br>GGTGGGGAAC<br>A | GGGCCCTTCAC<br>GACCTCTTCCA<br>GGTGGGGAAC<br>A | -_hom              | GGGCCCTTCACG<br>ACCTCTTCCAGG<br>TGGGGAACA |
| frameshift deletion  | AIM2     | chr1  | 159032487 | 159032487 | T                                         | T                                             | -_hom                                         | T                  | T                                         |
| frameshift deletion  | AK096249 | chr9  | 138363457 | 138363458 | AA                                        | AA                                            | -_het                                         | AA                 | AA                                        |
| frameshift deletion  | AK097289 | chr7  | 102063568 | 102063569 | TT                                        | TT                                            | -_het                                         | TT                 | TT                                        |
| frameshift deletion  | AK130759 | chr15 | 101841426 | 101841426 | C                                         | C                                             | -_het                                         | C                  | C                                         |
| frameshift deletion  | AKAP11   | chr13 | 42874486  | 42874486  | A                                         | A                                             | -_het                                         | A                  | A                                         |
| frameshift insertion | AKAP3    | chr12 | 4735965   | 4735965   | -                                         | -                                             | -                                             | C_het              | C_het                                     |

|                      |           |       |           |           |          |          |        |          |          |
|----------------------|-----------|-------|-----------|-----------|----------|----------|--------|----------|----------|
| frameshift deletion  | AKAP3     | chr12 | 4735970   | 4735970   | A        | A        | A      | -_het    | -_het    |
| frameshift insertion | ALKBH8    | chr11 | 107422610 | 107422610 | -        | -        | A_het  | -        | -        |
| frameshift deletion  | ANGEL2    | chr1  | 213180442 | 213180443 | AA       | AA       | -_hom  | AA       | AA       |
| frameshift deletion  | ANGPTL3   | chr1  | 63064446  | 63064446  | A        | A        | A      | -_hom    | A        |
| frameshift deletion  | ANHx      | chr12 | 133803561 | 133803561 | G        | G        | -_het  | G        | G        |
| frameshift deletion  | ANK3      | chr10 | 62149221  | 62149221  | T        | T        | -_het  | T        | T        |
| frameshift deletion  | ANKLE1    | chr19 | 17397494  | 17397501  | TGTGTGTT | TGTGTGTT | -_hom  | TGTGTGTT | TGTGTGTT |
| frameshift deletion  | ANKRD20A3 | chr9  | 67966645  | 67966645  | A        | A        | -_hom  | A        | A        |
| frameshift deletion  | ANKRD26   | chr10 | 27322259  | 27322259  | T        | T        | -_het  | T        | T        |
| frameshift deletion  | ANKRD34B  | chr5  | 79854592  | 79854592  | G        | G        | -_het  | G        | G        |
| frameshift deletion  | ANKRD36   | chr2  | 97818261  | 97818262  | GC       | -_het    | -_het  | -_het    | -_het    |
| frameshift insertion | ANKRD36   | chr2  | 97818264  | 97818264  | -        | TT_het   | TT_het | TT_het   | TT_het   |
| frameshift deletion  | ANKRD36   | chr2  | 97851074  | 97851074  | C        | -_het    | C      | C        | C        |
| frameshift insertion | ANKRD36   | chr2  | 97851078  | 97851078  | -        | G_het    | -      | -        | -        |
| frameshift insertion | ANKRD44   | chr2  | 197943382 | 197943382 | -        | -        | TG_het | -        | -        |
| stopgain             | ANKUB1    | chr3  | 149485819 | 149485819 | -        | -        | -      | CATT_hom | -        |
| frameshift deletion  | ANLN      | chr7  | 36462267  | 36462271  | TGAAT    | -_het    | TGAAT  | TGAAT    | TGAAT    |

|                      |              |       |           |           |    |    |                                   |                                   |    |
|----------------------|--------------|-------|-----------|-----------|----|----|-----------------------------------|-----------------------------------|----|
| frameshift deletion  | ANO8         | chr19 | 17439380  | 17439380  | C  | C  | -_het                             | C                                 | C  |
| frameshift deletion  | APPL2        | chr12 | 105570678 | 105570678 | A  | A  | -_het                             | A                                 | A  |
| frameshift deletion  | AQP7         | chr9  | 33385690  | 33385690  | G  | G  | -_het                             | G                                 | G  |
| frameshift deletion  | ARHGAP5      | chr14 | 32561191  | 32561191  | A  | A  | -_het                             | A                                 | A  |
| frameshift deletion  | ARHGAP5      | chr14 | 32562675  | 32562675  | T  | T  | -_het                             | T                                 | T  |
| frameshift insertion | ARHGEF5      | chr7  | 144059763 | 144059763 | -  | -  | TGGAGGCTGA<br>GGAGGCCAGC<br>G_het | TGGAGGCTGAG<br>GAGGCCAGCG<br>_het | -  |
| frameshift deletion  | ARID1A       | chr1  | 27106074  | 27106074  | G  | G  | -_het                             | G                                 | G  |
| frameshift deletion  | ARSA         | chr22 | 51065757  | 51065757  | C  | C  | -_het                             | C                                 | C  |
| frameshift deletion  | ASPCR1       | chr17 | 79974910  | 79974910  | C  | C  | -_het                             | C                                 | C  |
| frameshift deletion  | ASTE1        | chr3  | 130733047 | 130733048 | TT | TT | -_hom                             | TT                                | TT |
| frameshift deletion  | ATAD2        | chr8  | 124384893 | 124384893 | T  | T  | -_het                             | T                                 | T  |
| frameshift deletion  | ATG9A        | chr2  | 220085910 | 220085910 | G  | G  | -_het                             | G                                 | G  |
| frameshift deletion  | ATP13A3      | chr3  | 194140669 | 194140669 | A  | A  | -_het                             | A                                 | A  |
| frameshift insertion | ATP13A3      | chr3  | 194147849 | 194147849 | -  | -  | A_het                             | -                                 | -  |
| frameshift deletion  | ATP5J2-PTCD1 | chr7  | 99027358  | 99027358  | G  | G  | -_het                             | G                                 | G  |
| frameshift           | ATP6AP1      | chrX  | 153660772 | 153660773 | CT | CT | -_het                             | CT                                | CT |

|                      |          |       |           |           |    |       |       |    |       |
|----------------------|----------|-------|-----------|-----------|----|-------|-------|----|-------|
| deletion             |          |       |           |           |    |       |       |    |       |
| frameshift deletion  | ATP8B3   | chr19 | 1799764   | 1799764   | A  | -_het | A     | A  | -_het |
| frameshift deletion  | ATP8B4   | chr15 | 50189465  | 50189465  | A  | A     | -_het | A  | A     |
| frameshift deletion  | ATR      | chr3  | 142274740 | 142274740 | T  | T     | -_het | T  | T     |
| frameshift deletion  | AX746750 | chr10 | 104214081 | 104214082 | TT | TT    | -_hom | TT | TT    |
| frameshift deletion  | AX747192 | chr11 | 63997567  | 63997568  | AA | AA    | AA    | AA | -_het |
| frameshift deletion  | AX747828 | chr3  | 196159011 | 196159011 | G  | G     | -_het | G  | G     |
| frameshift deletion  | AX747968 | chr15 | 33010583  | 33010583  | A  | A     | -_het | A  | A     |
| frameshift deletion  | AX748283 | chr1  | 19675264  | 19675264  | C  | C     | C     | C  | -_hom |
| frameshift deletion  | AXIN1    | chr16 | 360055    | 360055    | G  | G     | -_het | G  | G     |
| frameshift deletion  | AXIN2    | chr17 | 63533905  | 63533905  | C  | C     | -_het | C  | C     |
| frameshift insertion | AXIN2    | chr17 | 63545677  | 63545677  | -  | -     | C_het | -  | -     |
| frameshift insertion | AXL      | chr19 | 41743932  | 41743932  | -  | -     | C_het | -  | -     |
| frameshift deletion  | BACH1    | chr21 | 30698479  | 30698479  | T  | T     | -_het | T  | T     |
| frameshift deletion  | BAHD1    | chr15 | 40750958  | 40750958  | C  | C     | -_het | C  | C     |
| frameshift deletion  | BAI1     | chr8  | 143546245 | 143546245 | C  | C     | -_het | C  | C     |
| frameshift deletion  | BAI2     | chr1  | 32201169  | 32201169  | C  | C     | -_het | C  | C     |

|                      |                |       |           |           |       |       |       |                                                          |       |
|----------------------|----------------|-------|-----------|-----------|-------|-------|-------|----------------------------------------------------------|-------|
| frameshift deletion  | BANK1          | chr4  | 102951317 | 102951317 | A     | A     | -_het | A                                                        | A     |
| frameshift insertion | BC031638       | chr21 | 47744121  | 47744121  | -     | -     | C_het | -                                                        | -     |
| frameshift deletion  | BC033456       | chr17 | 48258285  | 48258288  | AAAA  | AAAA  | -_hom | AAAA                                                     | AAAA  |
| frameshift deletion  | BC046483       | chr10 | 1095423   | 1095427   | GAGTT | GAGTT | GAGTT | -_het                                                    | GAGTT |
| frameshift insertion | BCAN           | chr1  | 156617346 | 156617346 | -     | -     | T_het | -                                                        | -     |
| frameshift deletion  | BCAS3          | chr17 | 59465981  | 59465981  | A     | A     | -_hom | A                                                        | A     |
| frameshift deletion  | BCO2           | chr11 | 112046328 | 112046328 | T     | T     | -_het | T                                                        | T     |
| frameshift deletion  | BCORL1         | chrX  | 129190011 | 129190011 | C     | C     | -_hom | C                                                        | C     |
| frameshift deletion  | BDP1           | chr5  | 70849097  | 70849097  | A     | A     | -_het | A                                                        | A     |
| frameshift insertion | BICC1          | chr10 | 60558976  | 60558976  | -     | -     | A_het | -                                                        | -     |
| frameshift insertion | BIRC7          | chr20 | 61870886  | 61870886  | -     | -     | C_het | -                                                        | -     |
| frameshift insertion | bK250D10.C22.8 | chr22 | 42354487  | 42354487  | -     | -     | -     | GAGAGAGA_hom                                             | -     |
| frameshift deletion  | bK250D10.C22.8 | chr22 | 42354488  | 42354489  | GA    | GA    | -_het | GA                                                       | GA    |
| frameshift deletion  | BLM            | chr15 | 91304139  | 91304139  | A     | A     | -_het | A                                                        | A     |
| stopgain             | BOD1           | chr5  | 173036437 | 173036437 | -     | -     | -     | TGAACCACT<br>CTGCCTCAAAC<br>CATTCGCAATT<br>GGTTTTGTT_het | -     |

|                      |          |       |           |           |                                                                                                                         |                                                                                                                             |        |                                                                                                                             |                                                                                                                       |
|----------------------|----------|-------|-----------|-----------|-------------------------------------------------------------------------------------------------------------------------|-----------------------------------------------------------------------------------------------------------------------------|--------|-----------------------------------------------------------------------------------------------------------------------------|-----------------------------------------------------------------------------------------------------------------------|
| frameshift insertion | BOK-AS1  | chr2  | 242498225 | 242498225 | -                                                                                                                       | -                                                                                                                           | -      | C_het                                                                                                                       | -                                                                                                                     |
| frameshift deletion  | BRD8     | chr5  | 137505021 | 137505021 | G                                                                                                                       | G                                                                                                                           | -_het  | G                                                                                                                           | G                                                                                                                     |
| frameshift deletion  | BRD9     | chr5  | 889777    | 889777    | A                                                                                                                       | A                                                                                                                           | -_hom  | A                                                                                                                           | A                                                                                                                     |
| frameshift insertion | BRSK1    | chr19 | 55815035  | 55815035  | -                                                                                                                       | -                                                                                                                           | -      | -                                                                                                                           | C_het                                                                                                                 |
| frameshift deletion  | BTAF1    | chr10 | 93756247  | 93756247  | T                                                                                                                       | T                                                                                                                           | -_het  | T                                                                                                                           | T                                                                                                                     |
| frameshift insertion | BTF3     | chr5  | 72795052  | 72795052  | -                                                                                                                       | -                                                                                                                           | -      | G_het                                                                                                                       | -                                                                                                                     |
| frameshift insertion | BTF3     | chr5  | 72795055  | 72795055  | -                                                                                                                       | -                                                                                                                           | -      | T_het                                                                                                                       | T_het                                                                                                                 |
| frameshift deletion  | BTF3     | chr5  | 72795056  | 72795056  | T                                                                                                                       | T                                                                                                                           | -_het  | T                                                                                                                           | T                                                                                                                     |
| frameshift deletion  | C11orf16 | chr11 | 8947465   | 8947555   | GTGATTGGCCCT<br>AGCAGAGAGCA<br>GCAAGGGGCCCA<br>GTGAAGGGGCCT<br>GGGGTGCTCCCT<br>GGTGAAAGACTT<br>GTGCAGCCTCTC<br>CACAGCCT | GTGATTGGCCC<br>TAGCAGAGAGC<br>AGCAAGGGGC<br>CCAGTGAAGGG<br>GCCTGGGGTGC<br>TCCCTGGTGAA<br>AGACTTGTGCA<br>GCCTCTCCACA<br>GCCT | -_het  | GTGATTGGCCC<br>TAGCAGAGAGC<br>AGCAAGGGGC<br>CCAGTGAAGGG<br>GCCTGGGGTGC<br>TCCCTGGTGAA<br>AGACTTGTGCA<br>GCCTCTCCACA<br>GCCT | GTGATTGGCCCTA<br>GCAGAGAGCAGC<br>AAGGGGCCAGT<br>GAAGGGGCCTGG<br>GGTCTCCCTGGT<br>GAAAGACTTGTG<br>CAGCCTCTCCACA<br>GCCT |
| frameshift insertion | C11orf40 | chr11 | 4592706   | 4592706   | -                                                                                                                       | AC_het                                                                                                                      | -      | AC_hom                                                                                                                      | AC_het                                                                                                                |
| frameshift insertion | C11orf40 | chr11 | 4592708   | 4592708   | -                                                                                                                       | -                                                                                                                           | AG_het | -                                                                                                                           | AG_het                                                                                                                |
| frameshift deletion  | C11orf40 | chr11 | 4592711   | 4592711   | T                                                                                                                       | T                                                                                                                           | -_het  | T                                                                                                                           | T                                                                                                                     |
| frameshift deletion  | C12orf68 | chr12 | 48578410  | 48578410  | G                                                                                                                       | G                                                                                                                           | -_het  | G                                                                                                                           | G                                                                                                                     |

|                      |              |       |           |           |      |                          |          |       |      |
|----------------------|--------------|-------|-----------|-----------|------|--------------------------|----------|-------|------|
| frameshift insertion | C14orf23     | chr14 | 29261307  | 29261307  | -    | C_het                    | -        | C_het | -    |
| frameshift insertion | C14orf23     | chr14 | 29261309  | 29261309  | -    | AC_het                   | -        | -     | -    |
| frameshift insertion | C17orf76-AS1 | chr17 | 16343005  | 16343005  | -    | -                        | GGTA_het | -     | -    |
| frameshift insertion | C1orf127     | chr1  | 11007946  | 11007946  | -    | -                        | C_het    | -     | -    |
| frameshift deletion  | C1S          | chr12 | 7173239   | 7173239   | A    | A                        | -_het    | A     | A    |
| frameshift deletion  | C20orf96     | chr20 | 271226    | 271228    | ACC  | ACC                      | ACC      | -_het | ACC  |
| frameshift deletion  | C20orf96     | chr20 | 271230    | 271231    | AC   | AC                       | AC       | -_het | AC   |
| frameshift insertion | C21orf2      | chr21 | 45759044  | 45759044  | -    | TGCACGCTGTG<br>CAGCT_het | -        | -     | -    |
| frameshift deletion  | C3orf18      | chr3  | 50596381  | 50596381  | G    | G                        | -_hom    | G     | G    |
| frameshift deletion  | C4orf17      | chr4  | 100451114 | 100451117 | AAGT | AAGT                     | -_het    | AAGT  | AAGT |
| frameshift deletion  | C7orf41      | chr7  | 30197146  | 30197146  | G    | G                        | -_het    | G     | G    |
| frameshift deletion  | C9orf91      | chr9  | 117379521 | 117379521 | C    | C                        | -_het    | C     | C    |
| frameshift deletion  | CACNB4       | chr2  | 152709963 | 152709963 | G    | G                        | -_het    | G     | G    |
| frameshift deletion  | CACYBP       | chr1  | 174976327 | 174976327 | A    | A                        | -_het    | A     | A    |
| frameshift deletion  | CAMSAP1      | chr9  | 138774701 | 138774701 | G    | G                        | -_het    | G     | G    |
| frameshift deletion  | CANX         | chr5  | 179149920 | 179149920 | T    | T                        | -_het    | T     | T    |



|                      |         |       |           |           |    |                        |        |    |        |
|----------------------|---------|-------|-----------|-----------|----|------------------------|--------|----|--------|
| frameshift insertion | CAPN2   | chr1  | 223900575 | 223900575 | -  | CACGGTAGGAA<br>GCG_hom | -      | -  | -      |
| frameshift deletion  | CARD10  | chr22 | 37887168  | 37887168  | G  | G                      | -_het  | G  | G      |
| frameshift deletion  | CASKIN2 | chr17 | 73499267  | 73499267  | C  | C                      | -_het  | C  | C      |
| frameshift deletion  | CASP5   | chr11 | 104874011 | 104874011 | T  | T                      | -_het  | T  | T      |
| frameshift deletion  | CASP5   | chr11 | 104879687 | 104879687 | T  | T                      | -_het  | T  | T      |
| frameshift insertion | CCDC136 | chr7  | 128455758 | 128455758 | -  | -                      | A_het  | -  | -      |
| frameshift deletion  | CCDC137 | chr17 | 79639624  | 79639625  | GA | GA                     | -_het  | GA | GA     |
| frameshift deletion  | CCDC150 | chr2  | 197531519 | 197531520 | AA | AA                     | -_het  | AA | AA     |
| frameshift deletion  | CCDC168 | chr13 | 103381996 | 103381996 | A  | A                      | -_het  | A  | A      |
| frameshift deletion  | CCDC28A | chr6  | 139097330 | 139097330 | A  | A                      | -_het  | A  | A      |
| frameshift deletion  | CCDC67  | chr11 | 93148301  | 93148301  | T  | T                      | -_het  | T  | T      |
| frameshift insertion | CCDC7   | chr10 | 32740798  | 32740798  | -  | T_het                  | -      | -  | -      |
| frameshift deletion  | CCDC9   | chr19 | 47768151  | 47768151  | G  | G                      | -_het  | G  | G      |
| frameshift insertion | CD109   | chr6  | 74495111  | 74495111  | -  | -                      | T_het  | -  | -      |
| frameshift deletion  | CD177   | chr19 | 43865320  | 43865321  | CT | -_het                  | -_hom  | CT | -_het  |
| frameshift insertion | CD177   | chr19 | 43865324  | 43865324  | -  | AG_het                 | AG_hom | -  | AG_het |

|                      |        |       |           |           |       |        |        |       |        |
|----------------------|--------|-------|-----------|-----------|-------|--------|--------|-------|--------|
| frameshift deletion  | CD36   | chr7  | 80285889  | 80285889  | A     | A      | A      | -_het | A      |
| frameshift deletion  | CDC20B | chr5  | 54468432  | 54468436  | CTTCT | CTTCT  | CTTCT  | -_het | CTTCT  |
| frameshift deletion  | CDC27  | chr17 | 45234407  | 45234407  | A     | A      | -_het  | A     | A      |
| frameshift deletion  | CDC7   | chr1  | 91967357  | 91967357  | A     | A      | -_het  | A     | A      |
| frameshift deletion  | CDK13  | chr7  | 39990762  | 39990762  | G     | G      | -_het  | G     | G      |
| frameshift deletion  | CDK20  | chr9  | 90582463  | 90582463  | G     | G      | -_het  | G     | G      |
| frameshift deletion  | CELA1  | chr12 | 51740408  | 51740411  | ATAA  | -_het  | -_het  | ATAA  | -_hom  |
| frameshift insertion | CELA1  | chr12 | 51740415  | 51740415  | -     | AG_het | AG_het | -     | AG_hom |
| frameshift insertion | CELA1  | chr12 | 51740416  | 51740416  | -     | G_het  | G_het  | -     | G_hom  |
| frameshift deletion  | CELSR1 | chr22 | 46793728  | 46793728  | C     | C      | -_het  | C     | C      |
| frameshift deletion  | CELSR1 | chr22 | 46931227  | 46931227  | C     | C      | -_het  | C     | C      |
| frameshift deletion  | CENPE  | chr4  | 104030036 | 104030036 | A     | A      | -_het  | A     | A      |
| frameshift deletion  | CEP290 | chr12 | 88524079  | 88524079  | T     | T      | -_het  | T     | T      |
| frameshift deletion  | CETP   | chr16 | 57007278  | 57007278  | C     | C      | -_het  | C     | C      |
| frameshift deletion  | CHD8   | chr14 | 21859176  | 21859176  | T     | T      | -_het  | T     | T      |
| frameshift insertion | CHEK1  | chr11 | 125497710 | 125497710 | -     | -      | T_het  | -     | -      |
| frameshift           | CHRM3  | chr1  | 240072444 | 240072444 | A     | A      | -_het  | A     | A      |

|                      |          |       |          |          |                                       |                                                 |                                                 |                                       |                                      |                                      |
|----------------------|----------|-------|----------|----------|---------------------------------------|-------------------------------------------------|-------------------------------------------------|---------------------------------------|--------------------------------------|--------------------------------------|
| deletion             |          |       |          |          |                                       |                                                 |                                                 |                                       |                                      |                                      |
| stopgain             | CLOCK    | chr4  | 56336954 | 56336954 | A                                     | A                                               | -_het                                           | A                                     | A                                    | A                                    |
| frameshift deletion  | CMA1     | chr14 | 24975317 | 24975317 | G                                     | G                                               | -_het                                           | G                                     | G                                    | G                                    |
| frameshift insertion | CMTM1    | chr16 | 66600730 | 66600730 | -                                     | -                                               | -                                               | -                                     | -                                    | AAATGAGATGGC<br>GATC_het             |
| frameshift deletion  | CNOT1    | chr16 | 58577316 | 58577316 | A                                     | A                                               | A                                               | -_het                                 | -_het                                | -_het                                |
| frameshift deletion  | CNTNAP3B | chr9  | 43853584 | 43853584 | T                                     | T                                               | T                                               | T                                     | T                                    | -_het                                |
| frameshift deletion  | COIL     | chr17 | 55028118 | 55028118 | T                                     | T                                               | -_het                                           | T                                     | T                                    | T                                    |
| frameshift deletion  | COL7A1   | chr3  | 48612871 | 48612871 | G                                     | G                                               | -_hom                                           | G                                     | G                                    | G                                    |
| frameshift deletion  | COLEC12  | chr18 | 331763   | 331763   | T                                     | T                                               | -_het                                           | T                                     | T                                    | T                                    |
| frameshift deletion  | CORO1B   | chr11 | 67209168 | 67209168 | G                                     | G                                               | -_hom                                           | G                                     | G                                    | G                                    |
| frameshift deletion  | CREBBP   | chr16 | 3781421  | 3781421  | G                                     | G                                               | -_het                                           | G                                     | G                                    | G                                    |
| frameshift insertion | CREBBP   | chr16 | 3807363  | 3807363  | -                                     | -                                               | G_het                                           | -                                     | -                                    | -                                    |
| frameshift insertion | CRIPAK   | chr4  | 1388350  | 1388350  | -                                     | TGCCCATGTGG<br>AGTGCCCGCCT<br>GCTCACACA_h<br>om | TGCCCATGTGG<br>AGTGCCCGCCT<br>GCTCACACA_h<br>et | -                                     | -                                    | -                                    |
| frameshift deletion  | CRIPAK   | chr4  | 1388594  | 1388622  | CACGTGCCCATG<br>TGGAGTGCCCGC<br>CTGCT | -_hom                                           | -_het                                           | CACGTGCCCAT<br>GTGGAGTGCCC<br>GCCTGCT | CACGTGCCCATGT<br>GGAGTGCCCGC<br>TGCT | CACGTGCCCATGT<br>GGAGTGCCCGC<br>TGCT |
| frameshift deletion  | CRIPAK   | chr4  | 1388944  | 1388947  | GTGG                                  | GTGG                                            | GTGG                                            | -_hom                                 | GTGG                                 | GTGG                                 |

|                      |          |       |           |           |                                                                                                                        |                                                                                                                            |                                                                                                                            |       |                                                                                                                     |
|----------------------|----------|-------|-----------|-----------|------------------------------------------------------------------------------------------------------------------------|----------------------------------------------------------------------------------------------------------------------------|----------------------------------------------------------------------------------------------------------------------------|-------|---------------------------------------------------------------------------------------------------------------------|
| frameshift deletion  | CRIPAK   | chr4  | 1388949   | 1389037   | GTGTTTCGCCTGCT<br>CACACGTGCCGA<br>TGCGGAGTGCCC<br>GCCTGCTCACAC<br>GTGCCGATGCGG<br>AGTGCCCGCCTG<br>CTCACACGTGCC<br>CATG | GTGTTTCGCCTG<br>CTCACACGTGC<br>CGATGCGGAGT<br>GCCCCGCTGCT<br>CACACGTGCCG<br>ATGCGGAGTGC<br>CCGCCTGCTCA<br>CACGTGCCCAT<br>G | GTGTTTCGCCTG<br>CTCACACGTGC<br>CGATGCGGAGT<br>GCCCCGCTGCT<br>CACACGTGCCG<br>ATGCGGAGTGC<br>CCGCCTGCTCA<br>CACGTGCCCAT<br>G | -_hom | GTGTTTCGCCTGCT<br>CACACGTGCCGAT<br>GCGGAGTGCCCCG<br>CCTGCTCACACGT<br>GCCGATGCGGAG<br>TGCCCCGCTGCTC<br>ACACGTGCCCATG |
| frameshift deletion  | CROCC    | chr1  | 17287578  | 17287578  | C                                                                                                                      | C                                                                                                                          | -_hom                                                                                                                      | C     | C                                                                                                                   |
| frameshift deletion  | CSMD3    | chr8  | 113241029 | 113241029 | A                                                                                                                      | A                                                                                                                          | -_het                                                                                                                      | A     | A                                                                                                                   |
| frameshift deletion  | CSNK1E   | chr22 | 38699188  | 38699188  | G                                                                                                                      | G                                                                                                                          | -_het                                                                                                                      | G     | G                                                                                                                   |
| frameshift deletion  | CSPG4    | chr15 | 75981842  | 75981854  | CCTCCAGCACCA<br>G                                                                                                      | CCTCCAGCACC<br>AG                                                                                                          | CCTCCAGCACC<br>AG                                                                                                          | -_het | CCTCCAGCACCAG                                                                                                       |
| frameshift deletion  | CTAGE1   | chr18 | 19995706  | 19995706  | G                                                                                                                      | G                                                                                                                          | -_het                                                                                                                      | G     | G                                                                                                                   |
| frameshift deletion  | CTAGE10P | chr13 | 50467039  | 50467039  | T                                                                                                                      | T                                                                                                                          | T                                                                                                                          | -_het | -_het                                                                                                               |
| frameshift deletion  | CTCF     | chr16 | 67645339  | 67645339  | A                                                                                                                      | A                                                                                                                          | -_het                                                                                                                      | A     | A                                                                                                                   |
| frameshift deletion  | CYP4F3   | chr19 | 15770184  | 15770184  | C                                                                                                                      | C                                                                                                                          | C                                                                                                                          | -_het | C                                                                                                                   |
| frameshift deletion  | DAZAP1   | chr19 | 1430254   | 1430254   | C                                                                                                                      | C                                                                                                                          | -_het                                                                                                                      | C     | C                                                                                                                   |
| frameshift deletion  | DAZAP1   | chr19 | 1434830   | 1434830   | G                                                                                                                      | G                                                                                                                          | -_het                                                                                                                      | G     | G                                                                                                                   |
| frameshift insertion | DCHS1    | chr11 | 6649949   | 6649949   | -                                                                                                                      | -                                                                                                                          | AG_het                                                                                                                     | -     | -                                                                                                                   |
| frameshift deletion  | DCHS2    | chr4  | 155244402 | 155244405 | TTTG                                                                                                                   | -_hom                                                                                                                      | -_hom                                                                                                                      | TTTG  | -_hom                                                                                                               |

|                      |                   |       |           |           |                                                   |                               |                                                   |                                                   |                                               |
|----------------------|-------------------|-------|-----------|-----------|---------------------------------------------------|-------------------------------|---------------------------------------------------|---------------------------------------------------|-----------------------------------------------|
| frameshift deletion  | DDX17             | chr22 | 38897211  | 38897211  | T                                                 | T                             | -_het                                             | T                                                 | T                                             |
| frameshift deletion  | DDX27             | chr20 | 47858504  | 47858505  | AA                                                | AA                            | -_het                                             | AA                                                | AA                                            |
| frameshift deletion  | DECR2             | chr16 | 460352    | 460388    | TGAGAAGTTCTT<br>CCGGGTGGGTGC<br>CTCGTGCGCTCT<br>G | -_hom                         | TGAGAAGTTCT<br>TCCGGGTGGGT<br>GCCTCGTGCGC<br>TCTG | TGAGAAGTTCT<br>TCCGGGTGGGT<br>GCCTCGTGCGC<br>TCTG | TGAGAAGTTCTTC<br>CGGGTGGGTGCC<br>TCGTGCGCTCTG |
| frameshift deletion  | DEFB126           | chr20 | 126156    | 126159    | CAAA                                              | -_het                         | -_hom                                             | CAAA                                              | -_het                                         |
| frameshift deletion  | DEFB126           | chr20 | 126311    | 126312    | CC                                                | -_het                         | -_hom                                             | CC                                                | -_het                                         |
| frameshift deletion  | DENND1C           | chr19 | 6468936   | 6468936   | C                                                 | C                             | -_het                                             | C                                                 | C                                             |
| frameshift insertion | DENND5A           | chr11 | 9171678   | 9171678   | -                                                 | -                             | T_het                                             | -                                                 | -                                             |
| frameshift insertion | DGKK              | chrX  | 50121146  | 50121146  | -                                                 | G_hom                         | G_hom                                             | G_hom                                             | G_hom                                         |
| frameshift deletion  | DHFR              | chr5  | 79950390  | 79950390  | C                                                 | C                             | C                                                 | -_het                                             | C                                             |
| frameshift deletion  | DHODH             | chr16 | 72055148  | 72055170  | CCCAACTGCC<br>GGGCTGCGGAG                         | CCCAACTGC<br>CGGGCTGCGG<br>AG | CCCAACTGC<br>CGGGCTGCGG<br>AG                     | CCCAACTGC<br>CGGGCTGCGGA<br>G                     | -_het                                         |
| frameshift insertion | DKFZp667P092<br>4 | chr2  | 96525717  | 96525717  | -                                                 | -                             | T_het                                             | T_het                                             | -                                             |
| frameshift deletion  | DKFZp761D112      | chr8  | 89046467  | 89046471  | AAAAA                                             | AAAAA                         | -_het                                             | AAAAA                                             | AAAAA                                         |
| frameshift deletion  | DLAT              | chr11 | 111904183 | 111904183 | A                                                 | A                             | -_het                                             | A                                                 | A                                             |
| frameshift deletion  | DLGAP3            | chr1  | 35365852  | 35365852  | C                                                 | C                             | -_het                                             | C                                                 | C                                             |
| frameshift           | DLL4              | chr15 | 41222270  | 41222270  | G                                                 | G                             | -_het                                             | G                                                 | G                                             |

|                      |         |       |           |           |      |           |           |       |        |
|----------------------|---------|-------|-----------|-----------|------|-----------|-----------|-------|--------|
| deletion             |         |       |           |           |      |           |           |       |        |
| frameshift deletion  | DMXL1   | chr5  | 118502316 | 118502316 | A    | A         | -_het     | A     | A      |
| frameshift insertion | DNAH12  | chr3  | 57509312  | 57509312  | -    | -         | TT_hom    | -     | -      |
| frameshift insertion | DNAH14  | chr1  | 225328438 | 225328438 | -    | -         | -         | -     | AT_het |
| frameshift deletion  | DNAH14  | chr1  | 225458505 | 225458508 | CAAA | CAAA      | CAAA      | -_hom | CAAA   |
| frameshift insertion | DNAH14  | chr1  | 225533751 | 225533751 | -    | -         | A_het     | -     | -      |
| frameshift insertion | DNAH2   | chr17 | 7667348   | 7667348   | -    | AGTGC_het | -         | -     | -      |
| frameshift deletion  | DNAH5   | chr5  | 13701426  | 13701426  | A    | A         | -_het     | A     | A      |
| frameshift deletion  | DNAJB9  | chr7  | 108213668 | 108213668 | T    | T         | -_het     | T     | T      |
| frameshift deletion  | DNM1P41 | chr15 | 85046529  | 85046529  | G    | G         | -_het     | G     | G      |
| frameshift deletion  | DNM1P41 | chr15 | 85046531  | 85046531  | G    | G         | -_het     | G     | G      |
| frameshift deletion  | DNM1P41 | chr15 | 85046591  | 85046594  | GTGT | GTGT      | GTGT      | GTGT  | -_het  |
| frameshift insertion | DNM1P46 | chr15 | 100340348 | 100340348 | -    | -         | ATGTA_het | -     | -      |
| frameshift insertion | DNM2    | chr19 | 10940881  | 10940881  | -    | -         | C_het     | -     | -      |
| frameshift deletion  | DOCK3   | chr3  | 51417604  | 51417604  | C    | C         | -_hom     | C     | C      |
| frameshift deletion  | DOCK8   | chr9  | 405015    | 405015    | T    | T         | -_het     | T     | T      |
| frameshift insertion | DPP10   | chr2  | 116534868 | 116534868 | -    | -         | A_het     | -     | -      |

|                      |          |       |           |           |                             |       |       |        |       |
|----------------------|----------|-------|-----------|-----------|-----------------------------|-------|-------|--------|-------|
| frameshift deletion  | DQ583205 | chr16 | 89299877  | 89299899  | TGCAACTCAACTC<br>ACACTGCGTA | -_hom | -_hom | -_hom  | -_hom |
| frameshift deletion  | DST      | chr6  | 56476324  | 56476324  | A                           | A     | -_het | A      | A     |
| frameshift deletion  | DUOX2    | chr15 | 45393426  | 45393429  | GAAC                        | GAAC  | -_het | GAAC   | GAAC  |
| frameshift insertion | DYNC1I2  | chr2  | 172546761 | 172546761 | -                           | -     | A_het | -      | -     |
| frameshift deletion  | DYRK2    | chr12 | 68052179  | 68052179  | A                           | A     | -_het | A      | A     |
| frameshift insertion | EIF3L    | chr22 | 38274022  | 38274022  | -                           | -     | A_het | -      | -     |
| frameshift insertion | EIF5AL1  | chr10 | 81272772  | 81272772  | -                           | -     | -     | CC_het | -     |
| frameshift deletion  | EIF5AL1  | chr10 | 81272776  | 81272776  | A                           | A     | A     | -_het  | A     |
| frameshift deletion  | EIF5AL1  | chr10 | 81272779  | 81272780  | AG                          | AG    | AG    | -_het  | AG    |
| frameshift insertion | ELK3     | chr12 | 96641028  | 96641028  | -                           | -     | C_het | -      | -     |
| frameshift insertion | ELMSAN1  | chr14 | 74205772  | 74205772  | -                           | -     | G_het | -      | -     |
| frameshift deletion  | EMC10    | chr19 | 50985132  | 50985132  | G                           | G     | -_het | G      | G     |
| frameshift deletion  | EMC8     | chr16 | 85832772  | 85832772  | G                           | G     | -_het | G      | G     |
| frameshift insertion | EML6     | chr2  | 55176076  | 55176076  | -                           | -     | A_het | -      | -     |
| frameshift deletion  | ENO4     | chr10 | 118618628 | 118618628 | A                           | A     | -_het | A      | A     |
| frameshift deletion  | ENTHD2   | chr17 | 79202956  | 79202956  | T                           | T     | -_het | T      | T     |

|                      |         |       |           |           |      |       |       |                                 |      |
|----------------------|---------|-------|-----------|-----------|------|-------|-------|---------------------------------|------|
| frameshift deletion  | ENTPD2  | chr9  | 139945517 | 139945517 | C    | C     | -_het | C                               | C    |
| frameshift deletion  | EPB41L1 | chr20 | 34793924  | 34793925  | GA   | -_hom | GA    | GA                              | GA   |
| frameshift deletion  | EPHB2   | chr1  | 23240246  | 23240246  | A    | A     | -_het | A                               | A    |
| frameshift insertion | EPHB6   | chr7  | 142562308 | 142562308 | -    | -     | G_het | -                               | -    |
| frameshift deletion  | EPPK1   | chr8  | 144946136 | 144946139 | TGAG | TGAG  | TGAG  | -_het                           | TGAG |
| frameshift deletion  | ERAP2   | chr5  | 96222415  | 96222415  | A    | A     | -_het | A                               | A    |
| frameshift insertion | EXO1    | chr1  | 242042051 | 242042051 | -    | -     | T_het | -                               | -    |
| frameshift deletion  | F13A1   | chr6  | 6175046   | 6175046   | T    | T     | -_het | T                               | T    |
| frameshift deletion  | F8      | chrX  | 154157686 | 154157686 | T    | T     | -_hom | T                               | T    |
| frameshift insertion | FAM109B | chr22 | 42473376  | 42473376  | -    | -     | G_het | -                               | -    |
| frameshift deletion  | FAM117A | chr17 | 47793566  | 47793566  | G    | G     | -_het | G                               | G    |
| frameshift insertion | FAM131A | chr3  | 184056454 | 184056454 | -    | -     | -     | AGGCCGCCCCC<br>GTGCCGGT_ho<br>m | -    |
| frameshift insertion | FAM151A | chr1  | 55081756  | 55081756  | -    | -     | G_het | -                               | -    |
| frameshift deletion  | FAM153B | chr5  | 175535666 | 175535667 | AG   | AG    | -_het | AG                              | AG   |



|                      |          |       |           |           |    |    |                                                    |                                                                                      |    |
|----------------------|----------|-------|-----------|-----------|----|----|----------------------------------------------------|--------------------------------------------------------------------------------------|----|
| frameshift insertion | FAM186A  | chr12 | 50745863  | 50745863  | -  | -  | CTGCTGAGGGG<br>TGAGAGGGATC<br>CCCAGGGCCTG<br>G_het | -                                                                                    | -  |
| frameshift deletion  | FAM189A1 | chr15 | 29429273  | 29429273  | G  | G  | -_het                                              | G                                                                                    | G  |
| frameshift deletion  | FAM193A  | chr4  | 2661593   | 2661593   | C  | C  | -_het                                              | C                                                                                    | C  |
| stopgain             | FAM20C   | chr7  | 286468    | 286468    | -  | -  | GACAGGTGAGC<br>CCTTCCTCCTC<br>CCTCCATCCGC_<br>het  | GACAGGTGAGC<br>CCTTCCTCCTC<br>CCTCCATCCGC_<br>het                                    | -  |
| frameshift insertion | FAM217A  | chr6  | 4070141   | 4070141   | -  | -  | -                                                  | T_hom                                                                                | -  |
| frameshift deletion  | FAM228B  | chr2  | 24360917  | 24360917  | A  | A  | -_het                                              | A                                                                                    | A  |
| frameshift deletion  | FAM9A    | chrX  | 8764320   | 8764320   | T  | T  | -_hom                                              | T                                                                                    | T  |
| frameshift insertion | FBN3     | chr19 | 8193948   | 8193948   | -  | -  | G_het                                              | -                                                                                    | -  |
| frameshift deletion  | FBRSL1   | chr12 | 133146935 | 133146935 | C  | C  | -_het                                              | C                                                                                    | C  |
| frameshift deletion  | FBXO11   | chr2  | 48050368  | 48050368  | T  | T  | -_het                                              | T                                                                                    | T  |
| frameshift deletion  | FER1L5   | chr2  | 97364482  | 97364483  | AG | AG | -_het                                              | AG                                                                                   | AG |
| stopgain             | FFAR3    | chr19 | 35863285  | 35863285  | -  | -  | -                                                  | CCTGTGCTGAA<br>AACTAGGTCCT<br>CCGGGGGAGG<br>AGGGTGTAGCT<br>GGCGTGTATC<br>CTCAGGGCGCT | -  |

|                      |          |       |           |           |    |       |       |        |       |
|----------------------|----------|-------|-----------|-----------|----|-------|-------|--------|-------|
|                      |          |       |           |           |    |       |       | TC_het |       |
| frameshift deletion  | FGF13    | chrX  | 137939823 | 137939823 | G  | G     | -_hom | G      | G     |
| frameshift deletion  | FGF22    | chr19 | 643528    | 643528    | G  | G     | -_het | G      | G     |
| frameshift deletion  | FGGY     | chr1  | 59812017  | 59812017  | G  | G     | -_het | G      | G     |
| frameshift deletion  | FIP1L1   | chr4  | 54319248  | 54319249  | AG | AG    | -_het | AG     | AG    |
| frameshift insertion | FKBP10   | chr17 | 39975558  | 39975558  | -  | -     | C_het | -      | -     |
| frameshift deletion  | FLJ00382 | chr14 | 106329450 | 106329451 | TG | -_hom | -_hom | -_het  | -_hom |
| frameshift deletion  | FLNC     | chr7  | 128486941 | 128486941 | G  | G     | -_het | G      | G     |
| frameshift deletion  | FNIP2    | chr4  | 159754866 | 159754866 | T  | T     | -_het | T      | T     |
| frameshift insertion | FOXO3    | chr6  | 108985176 | 108985176 | -  | -     | -     | -      | G_het |
| frameshift deletion  | FOXP2    | chr7  | 114269649 | 114269649 | T  | T     | -_het | T      | T     |
| frameshift insertion | FRG1B    | chr20 | 29632674  | 29632674  | -  | A_het | A_het | A_het  | A_het |
| frameshift deletion  | FRYL     | chr4  | 48636435  | 48636435  | T  | T     | -_het | T      | T     |
| frameshift deletion  | FUT8-AS1 | chr14 | 65878848  | 65878848  | G  | G     | -_het | G      | G     |

|                      |          |       |           |           |   |   |        |       |          |
|----------------------|----------|-------|-----------|-----------|---|---|--------|-------|----------|
| frameshift deletion  | FXR2     | chr17 | 7496122   | 7496122   | G | G | -_het  | G     | G        |
| frameshift deletion  | GABRE    | chrX  | 151130987 | 151130987 | A | A | -_hom  | A     | A        |
| frameshift deletion  | GBP3     | chr1  | 89473442  | 89473442  | T | T | -_het  | T     | T        |
| frameshift insertion | GIGYF1   | chr7  | 100285169 | 100285169 | - | - | G_het  | -     | -        |
| frameshift deletion  | GJA4     | chr1  | 35260764  | 35260764  | A | A | -_het  | A     | A        |
| frameshift deletion  | GLS      | chr2  | 191819456 | 191819456 | T | T | -_het  | T     | T        |
| frameshift deletion  | GLTSCR1  | chr19 | 48197891  | 48197891  | C | C | -_het  | C     | C        |
| frameshift deletion  | GMPS     | chr3  | 155621685 | 155621685 | A | A | -_het  | A     | A        |
| frameshift deletion  | GNPNAT1  | chr14 | 53250196  | 53250196  | A | A | -_het  | A     | A        |
| frameshift deletion  | GOLGA8CP | chr15 | 20777480  | 20777480  | G | G | -_het  | G     | G        |
| frameshift insertion | GOLGB1   | chr3  | 121409850 | 121409850 | - | - | TC_het | -     | -        |
| frameshift deletion  | GOSR1    | chr17 | 28811835  | 28811835  | T | T | -_het  | T     | T        |
| frameshift insertion | GP6      | chr19 | 55526103  | 55526103  | - | - | -      | -     | CAGA_het |
| frameshift deletion  | GPR124   | chr8  | 37691605  | 37691605  | G | G | -_het  | G     | G        |
| frameshift deletion  | GPR19    | chr12 | 12814274  | 12814274  | T | T | -_het  | T     | T        |
| frameshift insertion | GPRC6A   | chr6  | 117113762 | 117113762 | - | - | -      | A_hom | -        |

|                      |        |       |           |           |                   |                   |       |                   |                   |
|----------------------|--------|-------|-----------|-----------|-------------------|-------------------|-------|-------------------|-------------------|
| frameshift deletion  | GPRIN1 | chr5  | 176026122 | 176026134 | CAAAGACCCAGG<br>A | CAAAGACCCAG<br>GA | -_het | CAAAGACCCAG<br>GA | CAAAGACCCAGG<br>A |
| frameshift deletion  | GPRIN1 | chr5  | 176026136 | 176026146 | CCTCCTTCCTC       | CCTCCTTCCTC       | -_het | CCTCCTTCCTC       | CCTCCTTCCTC       |
| frameshift deletion  | GRP    | chr18 | 56892797  | 56892798  | GA                | GA                | -_het | GA                | GA                |
| frameshift insertion | GSDMD  | chr8  | 144642151 | 144642151 | -                 | -                 | -     | -                 | AGGGC_hom         |
| frameshift deletion  | GSDMD  | chr8  | 144642152 | 144642156 | AGGGC             | AGGGC             | AGGGC | -_het             | AGGGC             |
| frameshift deletion  | GUF1   | chr4  | 44700615  | 44700615  | A                 | A                 | -_het | A                 | A                 |
| frameshift deletion  | HAND2  | chr4  | 174448221 | 174448221 | T                 | T                 | -_het | T                 | T                 |
| frameshift insertion | HBS1L  | chr6  | 135357713 | 135357713 | -                 | -                 | -     | T_hom             | -                 |
| frameshift insertion | HCFC2  | chr12 | 104473346 | 104473346 | -                 | -                 | A_het | -                 | -                 |
| frameshift deletion  | HCN4   | chr15 | 73615394  | 73615394  | C                 | C                 | -_het | C                 | C                 |
| frameshift deletion  | HECTD3 | chr1  | 45475782  | 45475782  | G                 | G                 | -_het | G                 | G                 |
| frameshift deletion  | HERC2  | chr15 | 28518115  | 28518115  | C                 | -_het             | -_het | -_het             | -_het             |
| frameshift insertion | HERC6  | chr4  | 89311864  | 89311864  | -                 | -                 | C_het | -                 | -                 |
| frameshift insertion | HHEX   | chr10 | 94449930  | 94449930  | -                 | -                 | C_het | -                 | -                 |
| frameshift insertion | HIC2   | chr22 | 21799658  | 21799658  | -                 | -                 | C_het | -                 | -                 |
| frameshift deletion  | HIF1A  | chr14 | 62164608  | 62164608  | T                 | T                 | T     | -_het             | T                 |

|                      |           |       |           |           |       |              |              |              |              |
|----------------------|-----------|-------|-----------|-----------|-------|--------------|--------------|--------------|--------------|
| frameshift insertion | HILPDA    | chr7  | 128097489 | 128097489 | -     | -            | A_het        | -            | -            |
| frameshift deletion  | HIRA      | chr22 | 19346949  | 19346949  | C     | C            | -_het        | C            | C            |
| frameshift deletion  | HIST2H2BE | chr1  | 149858153 | 149858153 | T     | T            | -_het        | T            | T            |
| frameshift insertion | HLA-B     | chr6  | 31324488  | 31324488  | -     | -            | -            | -            | GGAG_hom     |
| frameshift deletion  | HLA-B     | chr6  | 31324493  | 31324493  | C     | C            | C            | C            | -_hom        |
| frameshift insertion | HLA-DRB1  | chr6  | 32551955  | 32551955  | -     | -            | CT_het       | -            | -            |
| frameshift deletion  | HLA-DRB1  | chr6  | 32551961  | 32551962  | GC    | GC           | -_het        | GC           | GC           |
| frameshift deletion  | HMGXB4    | chr22 | 35661544  | 35661544  | A     | A            | -_het        | A            | A            |
| frameshift deletion  | HNF1A     | chr12 | 121432115 | 121432115 | G     | G            | -_het        | G            | G            |
| frameshift insertion | HNF1A     | chr12 | 121434630 | 121434630 | -     | TCATTCAT_hom | TCATTCAT_hom | TCATTCAT_hom | TCATTCAT_het |
| frameshift deletion  | HOMEZ     | chr14 | 23744823  | 23744823  | A     | A            | -_het        | A            | A            |
| frameshift deletion  | HOMEZ     | chr14 | 23744825  | 23744829  | CTTCC | CTTCC        | -_het        | CTTCC        | CTTCC        |
| frameshift insertion | HPS5      | chr11 | 18330507  | 18330507  | -     | -            | A_het        | -            | -            |
| frameshift deletion  | HTR4      | chr5  | 147861099 | 147861099 | T     | T            | -_het        | T            | T            |
| frameshift deletion  | HTT       | chr4  | 3076659   | 3076660   | AG    | AG           | AG           | -_hom        | AG           |
| frameshift deletion  | HTT       | chr4  | 3076663   | 3076666   | ACAG  | ACAG         | ACAG         | -_hom        | ACAG         |
| frameshift           | ICA1      | chr7  | 8198251   | 8198251   | T     | T            | -_het        | T            | T            |

|                      |         |       |           |           |      |       |        |       |       |
|----------------------|---------|-------|-----------|-----------|------|-------|--------|-------|-------|
| deletion             |         |       |           |           |      |       |        |       |       |
| frameshift deletion  | ICK     | chr6  | 52880876  | 52880876  | A    | A     | A      | -_hom | A     |
| frameshift deletion  | IFRD1   | chr7  | 112107983 | 112107986 | GGTC | GGTC  | -_het  | GGTC  | GGTC  |
| frameshift insertion | IFRD1   | chr7  | 112107986 | 112107986 | -    | -     | AA_het | -     | -     |
| frameshift deletion  | IGF2BP3 | chr7  | 23385596  | 23385596  | T    | T     | -_het  | T     | T     |
| frameshift deletion  | IGFN1   | chr1  | 201177513 | 201177513 | G    | G     | -_het  | G     | G     |
| frameshift deletion  | IK      | chr5  | 140032593 | 140032594 | GA   | GA    | -_het  | GA    | GA    |
| frameshift deletion  | IL10RB  | chr21 | 34652203  | 34652203  | A    | A     | -_het  | A     | A     |
| frameshift insertion | IL32    | chr16 | 3119297   | 3119297   | -    | G_het | G_het  | -     | G_het |
| frameshift deletion  | IMPDH1  | chr7  | 128049849 | 128049849 | T    | T     | T      | T     | -_het |
| frameshift deletion  | INO80D  | chr2  | 206874449 | 206874449 | T    | T     | -_het  | T     | T     |
| frameshift deletion  | INO80D  | chr2  | 206882406 | 206882406 | T    | T     | -_het  | T     | T     |
| frameshift deletion  | INVS    | chr9  | 103054983 | 103054983 | G    | G     | -_het  | G     | G     |
| frameshift deletion  | ITPR2   | chr12 | 26589233  | 26589233  | C    | C     | -_het  | C     | C     |
| frameshift deletion  | ITSN1   | chr21 | 35122567  | 35122567  | C    | C     | -_het  | C     | C     |
| frameshift deletion  | JPH4    | chr14 | 24040436  | 24040436  | C    | C     | -_het  | C     | C     |
| frameshift insertion | KCNAB1  | chr3  | 156241685 | 156241685 | -    | -     | T_het  | -     | -     |

|                      |          |       |           |           |          |                                     |                                           |       |                                           |
|----------------------|----------|-------|-----------|-----------|----------|-------------------------------------|-------------------------------------------|-------|-------------------------------------------|
| frameshift deletion  | KCNC1    | chr11 | 17794004  | 17794004  | A        | A                                   | -_het                                     | A     | A                                         |
| frameshift insertion | KCNN3    | chr1  | 154842105 | 154842105 | -        | -                                   | G_het                                     | -     | -                                         |
| frameshift deletion  | KDM5A    | chr12 | 416953    | 416953    | T        | T                                   | -_het                                     | T     | T                                         |
| frameshift deletion  | KHNYN    | chr14 | 24900929  | 24900930  | CT       | CT                                  | -_het                                     | CT    | CT                                        |
| frameshift deletion  | KIAA0040 | chr1  | 175129946 | 175129946 | C        | C                                   | -_het                                     | -_hom | C                                         |
| frameshift deletion  | KIAA0040 | chr1  | 175129948 | 175129955 | TCTTCTTG | TCTTCTTG                            | -_het                                     | -_hom | TCTTCTTG                                  |
| frameshift insertion | KIAA0100 | chr17 | 26962586  | 26962586  | -        | -                                   | G_het                                     | -     | -                                         |
| frameshift insertion | KIAA0913 | chr10 | 75545602  | 75545602  | -        | -                                   | G_het                                     | -     | -                                         |
| frameshift deletion  | KIAA1009 | chr6  | 84896233  | 84896233  | A        | A                                   | -_het                                     | A     | A                                         |
| frameshift deletion  | KIAA1468 | chr18 | 59942747  | 59942747  | T        | T                                   | -_hom                                     | T     | T                                         |
| frameshift deletion  | KIAA2018 | chr3  | 113377482 | 113377482 | T        | T                                   | -_het                                     | T     | T                                         |
| frameshift deletion  | KIF20B   | chr10 | 91469743  | 91469743  | A        | A                                   | -_het                                     | A     | A                                         |
| frameshift deletion  | KIRREL2  | chr19 | 36357214  | 36357214  | C        | C                                   | -_het                                     | C     | C                                         |
| frameshift insertion | KLC3     | chr19 | 45850096  | 45850096  | -        | -                                   | CCTCCTTAGAAT<br>CCCACAGTCCC<br>CAAGAT_het | -     | CCTCCTTAGAATC<br>CCACAGTCCCCAA<br>GAT_het |
| frameshift insertion | KLHL35   | chr11 | 75141630  | 75141630  | -        | CGCACGGACCC<br>GCGCACGGCGC<br>C_het | -                                         | -     | -                                         |

|                      |           |       |           |           |                                                    |                                                     |                                                     |                          |                                                    |
|----------------------|-----------|-------|-----------|-----------|----------------------------------------------------|-----------------------------------------------------|-----------------------------------------------------|--------------------------|----------------------------------------------------|
| frameshift insertion | KLRG2     | chr7  | 139164493 | 139164493 | -                                                  | -                                                   | -                                                   | G_het                    | -                                                  |
| frameshift deletion  | KMT2B     | chr19 | 36223002  | 36223002  | G                                                  | G                                                   | -_het                                               | G                        | G                                                  |
| frameshift deletion  | KMT2C     | chr7  | 151855000 | 151855001 | AG                                                 | AG                                                  | -_het                                               | AG                       | AG                                                 |
| stopgain             | KMT2C     | chr7  | 151945071 | 151945071 | -                                                  | T_het                                               | T_het                                               | T_het                    | -                                                  |
| frameshift insertion | KMT2D     | chr12 | 49432287  | 49432287  | -                                                  | -                                                   | G_het                                               | -                        | -                                                  |
| frameshift insertion | KRI1      | chr19 | 10676487  | 10676487  | -                                                  | -                                                   | C_hom                                               | -                        | -                                                  |
| frameshift deletion  | KRIT1     | chr7  | 91843945  | 91843945  | T                                                  | T                                                   | -_het                                               | T                        | T                                                  |
| frameshift deletion  | KRT20     | chr17 | 39034613  | 39034616  | TCTT                                               | TCTT                                                | -_het                                               | TCTT                     | TCTT                                               |
| frameshift insertion | KRTAP10-1 | chr21 | 45959556  | 45959556  | -                                                  | TG_hom                                              | TG_hom                                              | -                        | TG_hom                                             |
| frameshift deletion  | KRTAP10-1 | chr21 | 45959558  | 45959559  | TC                                                 | -_hom                                               | -_hom                                               | TC                       | -_hom                                              |
| frameshift insertion | KRTAP4-3  | chr17 | 39324348  | 39324348  | -                                                  | -                                                   | AGCAGCT_het                                         | -                        | -                                                  |
| frameshift insertion | KRTAP4-3  | chr17 | 39324350  | 39324350  | -                                                  | -                                                   | AGATA_het                                           | -                        | -                                                  |
| frameshift deletion  | KRTAP5-4  | chr11 | 1643225   | 1643226   | GG                                                 | GG                                                  | GG                                                  | -_hom                    | GG                                                 |
| frameshift deletion  | KRTAP5-4  | chr11 | 1643228   | 1643267   | GCCACAGCCCC<br>ACAGCCAGAGCC<br>ACAGCCCCACA<br>GCCG | GCCACAGCCCC<br>CACAGCCAGAG<br>CCACAGCCCC<br>ACAGCCG | GCCACAGCCCC<br>CACAGCCAGAG<br>CCACAGCCCC<br>ACAGCCG | -_het                    | GCCACAGCCCCA<br>CAGCCAGAGCCA<br>CAGCCCCACAGC<br>CG |
| frameshift insertion | LAPTM4B   | chr8  | 98788165  | 98788165  | -                                                  | -                                                   | GGCGGGCTCCA<br>GGCGA_het                            | GGCGGGCTCCA<br>GGCGA_het | -                                                  |
| frameshift           | LFNG      | chr7  | 2552881   | 2552881   | -                                                  | GATG_het                                            | -                                                   | GATG_hom                 | -                                                  |



|                      |              |       |           |           |                    |        |       |                    |                    |
|----------------------|--------------|-------|-----------|-----------|--------------------|--------|-------|--------------------|--------------------|
| insertion            |              |       |           |           |                    |        |       |                    |                    |
| frameshift deletion  | LFNG         | chr7  | 2552882   | 2552885   | GATG               | GATG   | -_het | GATG               | -_hom              |
| frameshift insertion | LGR4         | chr11 | 27389970  | 27389970  | -                  | -      | A_het | -                  | -                  |
| frameshift deletion  | LINC00273    | chr16 | 33961471  | 33961472  | CG                 | -_het  | CG    | CG                 | CG                 |
| frameshift insertion | LINC00273    | chr16 | 33961475  | 33961475  | -                  | CA_het | -     | -                  | -                  |
| frameshift deletion  | LINC00473    | chr6  | 166401104 | 166401104 | A                  | A      | -_het | A                  | A                  |
| frameshift deletion  | LINC00552    | chr13 | 114453592 | 114453605 | TGTGTGTGCATG<br>CC | -_hom  | -_hom | TGTGTGTGCAT<br>GCC | TGTGTGTGCATGC<br>C |
| frameshift deletion  | LINC00615    | chr12 | 91340253  | 91340254  | TT                 | TT     | -_het | TT                 | TT                 |
| frameshift insertion | LINC00636    | chr3  | 107647001 | 107647001 | -                  | -      | A_het | -                  | -                  |
| frameshift deletion  | LINC00636    | chr3  | 107647002 | 107647002 | A                  | -_het  | A     | A                  | -_het              |
| frameshift insertion | LINC00636    | chr3  | 107647010 | 107647010 | -                  | -      | C_het | -                  | -                  |
| frameshift deletion  | LINC00907    | chr18 | 40096276  | 40096280  | TTTTT              | TTTTT  | -_hom | TTTTT              | TTTTT              |
| frameshift insertion | LINC00937    | chr12 | 8543153   | 8543153   | -                  | G_hom  | -     | -                  | -                  |
| frameshift deletion  | LIPE         | chr19 | 42911468  | 42911468  | G                  | G      | -_het | G                  | G                  |
| frameshift deletion  | LMAN1        | chr18 | 57013194  | 57013194  | T                  | T      | -_het | T                  | T                  |
| frameshift insertion | LMTK3        | chr19 | 49002845  | 49002845  | -                  | -      | C_het | -                  | -                  |
| frameshift           | LOC100129961 | chr2  | 135625119 | 135625120 | CT                 | CT     | -_het | CT                 | CT                 |

|                      |              |       |           |           |         |         |       |         |         |
|----------------------|--------------|-------|-----------|-----------|---------|---------|-------|---------|---------|
| deletion             |              |       |           |           |         |         |       |         |         |
| frameshift deletion  | LOC100272216 | chr5  | 68928682  | 68928682  | C       | C       | C     | C       | -_het   |
| frameshift deletion  | LOC100287036 | chr16 | 89390982  | 89390982  | G       | G       | -_het | G       | G       |
| frameshift deletion  | LOC286190    | chr8  | 71573034  | 71573034  | T       | T       | -_het | T       | T       |
| frameshift insertion | LOC401010    | chr2  | 132200620 | 132200620 | -       | -       | -     | G_het   | -       |
| frameshift deletion  | LOC643770    | chr12 | 98880902  | 98880903  | AA      | AA      | -_het | AA      | AA      |
| frameshift deletion  | LOC644189    | chr19 | 36912179  | 36912185  | AAAAAAA | AAAAAAA | -_het | AAAAAAA | AAAAAAA |
| frameshift deletion  | LPHN3        | chr4  | 62903505  | 62903506  | AG      | AG      | -_het | AG      | AG      |
| frameshift deletion  | LRIF1        | chr1  | 111495032 | 111495032 | T       | T       | -_het | T       | T       |
| frameshift deletion  | LRP1         | chr12 | 57560723  | 57560723  | C       | C       | -_het | C       | C       |
| frameshift insertion | LRP10        | chr14 | 23346503  | 23346503  | -       | -       | C_het | -       | -       |
| frameshift deletion  | LRRIQ1       | chr12 | 85638646  | 85638647  | AA      | AA      | AA    | AA      | -_het   |
| frameshift deletion  | LRRIQ3       | chr1  | 74575213  | 74575213  | T       | T       | -_het | T       | T       |
| frameshift deletion  | LSR          | chr19 | 35757845  | 35757845  | C       | C       | -_het | C       | C       |
| frameshift insertion | LTBP3        | chr11 | 65307031  | 65307031  | -       | -       | C_het | -       | -       |
| frameshift insertion | LYPD6B       | chr2  | 150061915 | 150061915 | -       | -       | A_het | -       | -       |
| frameshift deletion  | MAMDC4       | chr9  | 139752004 | 139752004 | C       | C       | -_het | C       | C       |

|                      |          |       |           |           |             |          |       |             |          |
|----------------------|----------|-------|-----------|-----------|-------------|----------|-------|-------------|----------|
| frameshift deletion  | MAML3    | chr4  | 140811084 | 140811084 | C           | -_hom    | -_hom | C           | -_het    |
| frameshift deletion  | MAML3    | chr4  | 140811086 | 140811096 | GCTGCTGCTGC | -_hom    | -_hom | GCTGCTGCTGC | -_het    |
| frameshift insertion | MAN1B1   | chr9  | 139996503 | 139996503 | -           | CATT_het | -     | -           | -        |
| frameshift deletion  | MAN2A1   | chr5  | 109125195 | 109125195 | A           | A        | -_het | A           | A        |
| frameshift insertion | MANEA    | chr6  | 96034869  | 96034869  | -           | -        | -     | -           | TATA_het |
| frameshift deletion  | MAPKBP1  | chr15 | 42111746  | 42111746  | G           | -_hom    | G     | -_het       | G        |
| frameshift deletion  | MARCKS   | chr6  | 114181210 | 114181210 | A           | A        | -_het | A           | A        |
| frameshift deletion  | MARS     | chr12 | 57883053  | 57883053  | T           | T        | -_het | T           | T        |
| frameshift deletion  | MARVELD2 | chr5  | 68736316  | 68736316  | A           | A        | -_het | A           | A        |
| frameshift insertion | MAST4    | chr5  | 66462580  | 66462580  | -           | -        | -     | -           | G_het    |
| frameshift deletion  | MBD4     | chr3  | 129155548 | 129155548 | T           | T        | -_hom | T           | T        |
| frameshift deletion  | MBD6     | chr12 | 57921401  | 57921401  | C           | C        | -_het | C           | C        |
| frameshift deletion  | MBD6     | chr12 | 57921732  | 57921732  | G           | G        | -_het | G           | G        |
| frameshift deletion  | MCF2     | chrX  | 138708412 | 138708412 | T           | T        | -_hom | T           | T        |
| frameshift deletion  | MCHR2    | chr6  | 100382358 | 100382358 | A           | A        | -_het | A           | A        |
| frameshift deletion  | MCOLN1   | chr19 | 7592610   | 7592610   | C           | C        | -_het | C           | C        |
| frameshift           | MCPH1    | chr8  | 6289099   | 6289100   | AA          | AA       | -_het | AA          | AA       |

|                      |          |       |           |           |       |       |       |                 |       |
|----------------------|----------|-------|-----------|-----------|-------|-------|-------|-----------------|-------|
| deletion             |          |       |           |           |       |       |       |                 |       |
| frameshift deletion  | MDN1     | chr6  | 90432675  | 90432675  | T     | T     | -_het | T               | T     |
| frameshift deletion  | MEPCE    | chr7  | 100028202 | 100028202 | G     | G     | -_het | G               | G     |
| frameshift insertion | MESP1    | chr15 | 90294304  | 90294304  | -     | -     | -     | G_het           | -     |
| frameshift insertion | MESP1    | chr15 | 90294306  | 90294306  | -     | -     | -     | ACGGGGCTCGG_het | -     |
| frameshift deletion  | MET      | chr7  | 116381122 | 116381126 | TTTTT | TTTTT | -_het | TTTTT           | TTTTT |
| frameshift deletion  | MFI2     | chr3  | 196736547 | 196736547 | G     | G     | -_het | G               | G     |
| frameshift deletion  | MFSD7    | chr4  | 677499    | 677499    | C     | C     | -_het | C               | C     |
| frameshift deletion  | MGC2752  | chr19 | 59093604  | 59093607  | AAAA  | AAAA  | -_hom | AAAA            | AAAA  |
| frameshift deletion  | MICALL1  | chr22 | 38323583  | 38323583  | C     | C     | -_het | C               | C     |
| frameshift deletion  | MICU2    | chr13 | 22077129  | 22077129  | A     | A     | -_het | A               | A     |
| frameshift deletion  | MIS18BP1 | chr14 | 45716019  | 45716020  | TT    | TT    | -_het | TT              | TT    |
| frameshift deletion  | MKI67    | chr10 | 129902204 | 129902205 | TG    | TG    | -_het | TG              | TG    |
| frameshift deletion  | MLH3     | chr14 | 75514604  | 75514604  | T     | T     | -_het | T               | T     |
| frameshift deletion  | MMP1     | chr11 | 102667447 | 102667447 | A     | A     | -_het | A               | A     |
| frameshift deletion  | MMP11    | chr22 | 24122806  | 24122806  | G     | G     | -_het | G               | G     |
| frameshift           | MST1L    | chr1  | 17085171  | 17085171  | -     | -     | -     | G_het           | -     |

|                      |       |       |           |           |                                                          |                                                              |                                                              |                                                              |          |
|----------------------|-------|-------|-----------|-----------|----------------------------------------------------------|--------------------------------------------------------------|--------------------------------------------------------------|--------------------------------------------------------------|----------|
| insertion            |       |       |           |           |                                                          |                                                              |                                                              |                                                              |          |
| frameshift deletion  | MST1L | chr1  | 17086000  | 17086003  | CCCG                                                     | -_het                                                        | -_het                                                        | -_het                                                        | -_het    |
| frameshift insertion | MST1L | chr1  | 17086085  | 17086085  | -                                                        | -                                                            | C_hom                                                        | -                                                            | -        |
| frameshift deletion  | MST1L | chr1  | 17087542  | 17087546  | GTGCT                                                    | -_het                                                        | -_het                                                        | -_het                                                        | -_het    |
| frameshift deletion  | MTR   | chr1  | 237024423 | 237024428 | AGGGCA                                                   | AGGGCA                                                       | AGGGCA                                                       | AGGGCA                                                       | -_het    |
| frameshift insertion | MUC16 | chr19 | 8999497   | 8999497   | -                                                        | ACCA_het                                                     | ACCA_het                                                     | -                                                            | -        |
| frameshift deletion  | MUC16 | chr19 | 8999498   | 8999501   | GCTT                                                     | GCTT                                                         | GCTT                                                         | -_het                                                        | -_het    |
| frameshift deletion  | MUC16 | chr19 | 8999499   | 8999502   | CTTT                                                     | -_het                                                        | -_het                                                        | -_het                                                        | CTTT     |
| frameshift insertion | MUC16 | chr19 | 8999502   | 8999502   | -                                                        | -                                                            | -                                                            | CCGA_het                                                     | CCGA_het |
| frameshift deletion  | MUC17 | chr7  | 100680294 | 100680294 | G                                                        | G                                                            | G                                                            | -_het                                                        | G        |
| frameshift insertion | MUC17 | chr7  | 100680296 | 100680296 | -                                                        | -                                                            | -                                                            | C_het                                                        | -        |
| frameshift deletion  | MUC19 | chr12 | 40805840  | 40805840  | T                                                        | T                                                            | -_het                                                        | T                                                            | T        |
| frameshift deletion  | MUC4  | chr3  | 195505788 | 195505791 | GTGA                                                     | GTGA                                                         | GTGA                                                         | GTGA                                                         | -_het    |
| frameshift deletion  | MUC4  | chr3  | 195505793 | 195505836 | CTGTGGATGCTG<br>AGGAAGTGTCGG<br>TGACAGGAAGAG<br>GGGTGGCG | CTGTGGATGCT<br>GAGGAAGTGTC<br>GGTGACAGGA<br>AGAGGGGTGG<br>CG | CTGTGGATGCT<br>GAGGAAGTGTC<br>GGTGACAGGA<br>AGAGGGGTGG<br>CG | CTGTGGATGCT<br>GAGGAAGTGTC<br>GGTGACAGGA<br>AGAGGGGTGG<br>CG | -_het    |
| frameshift deletion  | MUC4  | chr3  | 195506651 | 195506652 | CA                                                       | CA                                                           | CA                                                           | -_hom                                                        | -_hom    |

|                      |      |       |           |           |                                                                                                                    |                                                                                                                    |                                                                                                                    |                                                                                                                    |        |
|----------------------|------|-------|-----------|-----------|--------------------------------------------------------------------------------------------------------------------|--------------------------------------------------------------------------------------------------------------------|--------------------------------------------------------------------------------------------------------------------|--------------------------------------------------------------------------------------------------------------------|--------|
| frameshift deletion  | MUC4 | chr3  | 195507035 | 195507036 | CC                                                                                                                 | CC                                                                                                                 | CC                                                                                                                 | -_het                                                                                                              | CC     |
| frameshift insertion | MUC4 | chr3  | 195507038 | 195507038 | -                                                                                                                  | -                                                                                                                  | -                                                                                                                  | TC_het                                                                                                             | -      |
| frameshift deletion  | MUC4 | chr3  | 195507364 | 195507373 | GGGGTGGCCT                                                                                                         | GGGGTGGCCT                                                                                                         | GGGGTGGCCT                                                                                                         | GGGGTGGCCT                                                                                                         | -_het  |
| frameshift deletion  | MUC4 | chr3  | 195507376 | 195507461 | CCTGTGGATGCT<br>GAGGAAGTGTCC<br>GTGACAGGAAGA<br>CGGGTGGTGTCA<br>CCTGTGGATGCT<br>GAGGAAGTGTGC<br>GTGACAGGAAGA<br>GG | CCTGTGGATGC<br>TGAGGAAGTGT<br>CCGTGACAGGA<br>AGACGGGTGG<br>TGTCACCTGTG<br>GATGCTGAGGA<br>AGTGTCGGTGA<br>CAGGAAGAGG | CCTGTGGATGC<br>TGAGGAAGTGT<br>CCGTGACAGGA<br>AGACGGGTGG<br>TGTCACCTGTG<br>GATGCTGAGGA<br>AGTGTCGGTGA<br>CAGGAAGAGG | CCTGTGGATGC<br>TGAGGAAGTGT<br>CCGTGACAGGA<br>AGACGGGTGGT<br>GTCACCTGTGG<br>ATGCTGAGGAA<br>GTGTCGGTGAC<br>AGGAAGAGG | -_het  |
| frameshift deletion  | MUC4 | chr3  | 195511446 | 195511446 | C                                                                                                                  | -_het                                                                                                              | C                                                                                                                  | C                                                                                                                  | C      |
| frameshift deletion  | MUC4 | chr3  | 195514498 | 195514499 | AG                                                                                                                 | AG                                                                                                                 | AG                                                                                                                 | -_hom                                                                                                              | AG     |
| frameshift insertion | MUC4 | chr3  | 195514501 | 195514501 | -                                                                                                                  | -                                                                                                                  | -                                                                                                                  | G_hom                                                                                                              | -      |
| frameshift insertion | MUC4 | chr3  | 195514502 | 195514502 | -                                                                                                                  | -                                                                                                                  | -                                                                                                                  | C_hom                                                                                                              | -      |
| frameshift insertion | MUC6 | chr11 | 1017035   | 1017035   | -                                                                                                                  | -                                                                                                                  | -                                                                                                                  | AT_het                                                                                                             | -      |
| frameshift deletion  | MUC6 | chr11 | 1017041   | 1017042   | GT                                                                                                                 | GT                                                                                                                 | GT                                                                                                                 | -_het                                                                                                              | GT     |
| frameshift insertion | MUC6 | chr11 | 1018215   | 1018215   | -                                                                                                                  | CA_het                                                                                                             | -                                                                                                                  | -                                                                                                                  | CA_het |
| frameshift deletion  | MUC6 | chr11 | 1018223   | 1018224   | AT                                                                                                                 | -_het                                                                                                              | AT                                                                                                                 | AT                                                                                                                 | -_het  |
| frameshift insertion | MUM1 | chr19 | 1360569   | 1360569   | -                                                                                                                  | -                                                                                                                  | G_het                                                                                                              | -                                                                                                                  | -      |

|                      |               |       |           |           |    |       |       |    |       |
|----------------------|---------------|-------|-----------|-----------|----|-------|-------|----|-------|
| frameshift deletion  | MYEOV         | chr11 | 69063724  | 69063724  | G  | G     | G     | G  | -_het |
| frameshift deletion  | MYPOP         | chr19 | 46393972  | 46393972  | G  | G     | -_het | G  | G     |
| frameshift deletion  | NANOS1        | chr10 | 120789360 | 120789360 | C  | C     | -_hom | C  | C     |
| frameshift insertion | NARG2         | chr15 | 60741266  | 60741266  | -  | -     | T_het | -  | -     |
| frameshift deletion  | NARG2         | chr15 | 60745782  | 60745782  | A  | A     | -_hom | A  | A     |
| frameshift deletion  | NBEA          | chr13 | 35733663  | 35733663  | A  | A     | -_het | A  | A     |
| frameshift deletion  | NBEAL1        | chr2  | 203922058 | 203922058 | A  | A     | -_het | A  | A     |
| frameshift deletion  | NCOR1         | chr17 | 15983844  | 15983845  | AT | -_het | AT    | AT | AT    |
| frameshift deletion  | NDUFC2-KCTD14 | chr11 | 77784147  | 77784147  | A  | A     | -_het | A  | A     |
| frameshift deletion  | NFATC2        | chr20 | 50158999  | 50158999  | C  | C     | -_het | C  | C     |
| frameshift deletion  | NFKBIA        | chr14 | 35872461  | 35872461  | G  | G     | -_het | G  | G     |
| frameshift deletion  | NGDN          | chr14 | 23946763  | 23946763  | A  | A     | -_het | A  | A     |
| frameshift deletion  | NID2          | chr14 | 52481919  | 52481919  | G  | G     | -_het | G  | G     |
| frameshift deletion  | NIPBL         | chr5  | 37051862  | 37051862  | T  | T     | -_hom | T  | T     |
| frameshift deletion  | NKG7          | chr19 | 51875459  | 51875459  | G  | G     | -_het | G  | G     |
| frameshift deletion  | NLRC5         | chr16 | 57059488  | 57059488  | C  | C     | -_het | C  | C     |
| frameshift           | NMBR          | chr6  | 142399695 | 142399695 | T  | T     | -_het | T  | T     |

|                      |        |       |           |           |            |            |                                    |                                    |            |
|----------------------|--------|-------|-----------|-----------|------------|------------|------------------------------------|------------------------------------|------------|
| deletion             |        |       |           |           |            |            |                                    |                                    |            |
| frameshift insertion | NOM1   | chr7  | 156752697 | 156752697 | -          | -          | A_het                              | -                                  | -          |
| frameshift insertion | NOP16  | chr5  | 175811094 | 175811094 | -          | GT_hom     | GT_hom                             | AT_hom                             | GT_hom     |
| frameshift deletion  | NRXN2  | chr11 | 64410246  | 64410246  | C          | C          | -_het                              | C                                  | C          |
| frameshift insertion | NSRP1  | chr17 | 28505166  | 28505166  | -          | -          | A_het                              | -                                  | -          |
| frameshift insertion | NTN5   | chr19 | 49173723  | 49173723  | -          | -          | G_het                              | -                                  | -          |
| frameshift insertion | NUDT18 | chr8  | 21966891  | 21966891  | -          | -          | CCGCTCCCAGT<br>CCCTGCGGAGA<br>_het | CCGCTCCCAGT<br>CCCTGCGGAGA<br>_hom | -          |
| frameshift deletion  | NUP214 | chr9  | 134007993 | 134007993 | A          | A          | -_het                              | A                                  | A          |
| frameshift deletion  | ODF1   | chr8  | 103573024 | 103573031 | GCCCCTGC   | GCCCCTGC   | GCCCCTGC                           | -_het                              | GCCCCTGC   |
| frameshift deletion  | ODF1   | chr8  | 103573033 | 103573042 | ACCCGTGCAG | ACCCGTGCAG | ACCCGTGCAG                         | -_het                              | ACCCGTGCAG |
| frameshift deletion  | OLIG2  | chr21 | 34399986  | 34399986  | G          | G          | -_het                              | G                                  | G          |
| frameshift insertion | OR11G2 | chr14 | 20666175  | 20666175  | -          | A_hom      | A_het                              | A_hom                              | A_hom      |
| frameshift insertion | OR2B6  | chr6  | 27925197  | 27925197  | -          | -          | T_het                              | -                                  | -          |
| frameshift deletion  | OR2L2  | chr1  | 248202094 | 248202094 | T          | T          | -_het                              | T                                  | T          |
| stopgain             | OR2T35 | chr1  | 248801602 | 248801602 | -          | -          | -                                  | CA_het                             | -          |
| frameshift deletion  | OR2T35 | chr1  | 248801945 | 248801951 | CAGCACG    | CAGCACG    | -_hom                              | -_hom                              | -_het      |
| frameshift           | OR4A16 | chr11 | 55111232  | 55111233  | TT         | -_het      | TT                                 | TT                                 | TT         |



|                      |        |       |           |           |      |        |          |          |        |
|----------------------|--------|-------|-----------|-----------|------|--------|----------|----------|--------|
| deletion             |        |       |           |           |      |        |          |          |        |
| frameshift insertion | OR4A16 | chr11 | 55111234  | 55111234  | -    | CA_het | -        | -        | -      |
| frameshift deletion  | OR4C3  | chr11 | 48347449  | 48347449  | A    | A      | -_het    | A        | A      |
| frameshift insertion | OR4C45 | chr11 | 48367050  | 48367050  | -    | AG_het | AG_het   | AG_het   | AG_het |
| frameshift insertion | OR4M2  | chr15 | 22369023  | 22369023  | -    | -      | G_het    | -        | -      |
| frameshift deletion  | OR52N5 | chr11 | 5799652   | 5799652   | A    | A      | -_het    | A        | A      |
| frameshift deletion  | OR6C76 | chr12 | 55820959  | 55820960  | AA   | AA     | -_het    | AA       | AA     |
| frameshift deletion  | OR7C2  | chr19 | 15052829  | 15052829  | T    | T      | -_het    | T        | T      |
| frameshift insertion | OR8U8  | chr11 | 56143255  | 56143255  | -    | GA_het | GA_het   | GA_het   | GA_het |
| frameshift deletion  | OR8U8  | chr11 | 56143260  | 56143261  | GT   | -_het  | -_het    | -_het    | -_het  |
| frameshift insertion | OR8U8  | chr11 | 56143424  | 56143424  | -    | -      | CGGC_het | CGGC_het | -      |
| frameshift deletion  | OR8U8  | chr11 | 56143426  | 56143429  | ATCA | ATCA   | -_het    | -_het    | ATCA   |
| frameshift insertion | OR8U8  | chr11 | 56143782  | 56143782  | -    | GA_het | GA_het   | GA_het   | -      |
| frameshift deletion  | OR8U8  | chr11 | 56143785  | 56143786  | AT   | -_het  | -_het    | -_het    | AT     |
| frameshift deletion  | ORC5   | chr7  | 103805692 | 103805692 | T    | T      | -_het    | T        | T      |
| frameshift insertion | OSMR   | chr5  | 38923328  | 38923328  | -    | -      | A_het    | -        | -      |
| frameshift deletion  | OTOG   | chr11 | 17656703  | 17656703  | G    | G      | -_hom    | G        | G      |

|                      |          |       |           |           |       |        |        |           |        |
|----------------------|----------|-------|-----------|-----------|-------|--------|--------|-----------|--------|
| frameshift deletion  | OVCA2    | chr17 | 1945491   | 1945491   | C     | C      | -_het  | C         | C      |
| frameshift deletion  | OXA1L    | chr14 | 23236555  | 23236558  | CTTC  | CTTC   | -_het  | CTTC      | CTTC   |
| frameshift deletion  | OXER1    | chr2  | 42990728  | 42990728  | G     | G      | -_het  | G         | G      |
| frameshift deletion  | PABPC1   | chr8  | 101721933 | 101721933 | T     | T      | T      | -_het     | T      |
| frameshift insertion | PABPC3   | chr13 | 25670801  | 25670801  | -     | G_het  | -      | G_het     | -      |
| frameshift deletion  | PABPC3   | chr13 | 25671273  | 25671273  | G     | -_het  | G      | -_het     | -_het  |
| frameshift deletion  | PABPC3   | chr13 | 25671311  | 25671315  | TATGA | -_het  | TATGA  | -_het     | -_het  |
| frameshift deletion  | PABPC3   | chr13 | 25671333  | 25671333  | A     | -_het  | A      | -_het     | -_het  |
| frameshift insertion | PADI3    | chr1  | 17601264  | 17601264  | -     | -      | G_het  | -         | -      |
| frameshift insertion | PARP2    | chr14 | 20825321  | 20825321  | -     | -      | -      | TTCAC_het | -      |
| frameshift insertion | PCDHB17  | chr5  | 140537010 | 140537010 | -     | -      | -      | -         | A_het  |
| frameshift insertion | PCDHB8   | chr5  | 140558313 | 140558313 | -     | CC_hom | CC_het | -         | CC_het |
| frameshift deletion  | PCDHB8   | chr5  | 140558316 | 140558317 | TC    | -_hom  | -_het  | TC        | -_het  |
| frameshift deletion  | PCDHGA10 | chr5  | 140795209 | 140795209 | A     | A      | -_het  | A         | A      |
| frameshift deletion  | PCDHGA12 | chr5  | 140812776 | 140812776 | T     | T      | -_het  | T         | T      |
| frameshift deletion  | PCLO     | chr7  | 82582944  | 82582944  | T     | T      | -_het  | T         | T      |
| frameshift           | PCNL2    | chr1  | 233337948 | 233337948 | T     | T      | -_hom  | T         | T      |

|                      |         |       |           |           |                    |                    |                    |                    |       |
|----------------------|---------|-------|-----------|-----------|--------------------|--------------------|--------------------|--------------------|-------|
| deletion             |         |       |           |           |                    |                    |                    |                    |       |
| frameshift deletion  | PCSK5   | chr9  | 78790149  | 78790153  | AATGA              | -_het              | AATGA              | AATGA              | AATGA |
| frameshift insertion | PCSK5   | chr9  | 78790187  | 78790187  | -                  | -                  | -                  | GAATC_hom          | -     |
| frameshift deletion  | PCSK5   | chr9  | 78790208  | 78790212  | GAATA              | GAATA              | -_het              | GAATA              | GAATA |
| frameshift deletion  | PDE11A  | chr2  | 178936605 | 178936605 | G                  | G                  | -_het              | G                  | G     |
| frameshift deletion  | PDE3A   | chr12 | 20522723  | 20522723  | G                  | G                  | -_het              | G                  | G     |
| frameshift deletion  | PDIA2   | chr16 | 336701    | 336702    | CT                 | CT                 | -_het              | CT                 | CT    |
| frameshift deletion  | PDS5B   | chr13 | 33344888  | 33344889  | AA                 | AA                 | -_het              | AA                 | AA    |
| frameshift deletion  | PDXDC1  | chr16 | 15100306  | 15100306  | A                  | A                  | -_het              | A                  | A     |
| frameshift deletion  | PFKFB3  | chr10 | 6268227   | 6268227   | A                  | A                  | -_het              | A                  | A     |
| frameshift deletion  | PHACTR1 | chr6  | 13206056  | 13206056  | C                  | C                  | -_het              | C                  | C     |
| frameshift deletion  | PHACTR4 | chr1  | 28785730  | 28785730  | A                  | A                  | -_hom              | A                  | A     |
| frameshift deletion  | PHC3    | chr3  | 169889138 | 169889138 | A                  | A                  | -_het              | A                  | A     |
| frameshift insertion | PHF15   | chr5  | 133861425 | 133861425 | -                  | -                  | G_het              | -                  | -     |
| frameshift deletion  | PHF2    | chr9  | 96422612  | 96422612  | A                  | A                  | -_het              | A                  | A     |
| stopgain             | PHKA1   | chrX  | 71802286  | 71802286  | T                  | T                  | -_hom              | T                  | T     |
| frameshift deletion  | PI4KAP2 | chr22 | 21832293  | 21832306  | GCAGTGGCCACC<br>AC | GCAGTGGCCAC<br>CAC | GCAGTGGCCAC<br>CAC | GCAGTGGCCAC<br>CAC | -_het |

|                      |          |       |           |           |      |          |          |       |          |
|----------------------|----------|-------|-----------|-----------|------|----------|----------|-------|----------|
| frameshift insertion | PIDD     | chr11 | 801631    | 801631    | -    | G_hom    | G_het    | -     | G_het    |
| frameshift deletion  | PIGM     | chr1  | 160000813 | 160000813 | A    | A        | -_het    | A     | A        |
| frameshift deletion  | PKD1     | chr16 | 2143888   | 2143888   | G    | G        | -_het    | G     | G        |
| frameshift insertion | PKD1L3   | chr16 | 71981414  | 71981414  | -    | TTTG_hom | TTTG_het | -     | TTTG_hom |
| frameshift deletion  | PKHD1    | chr6  | 51930802  | 51930802  | A    | A        | -_het    | A     | A        |
| frameshift deletion  | PLCG2    | chr16 | 81954997  | 81954998  | TT   | TT       | -_het    | TT    | TT       |
| frameshift deletion  | PLXNB3   | chrX  | 153042691 | 153042691 | G    | G        | -_hom    | G     | G        |
| frameshift deletion  | PNPLA5   | chr22 | 44287050  | 44287050  | G    | G        | -_het    | G     | G        |
| frameshift insertion | PNPLA6   | chr19 | 7620540   | 7620540   | -    | -        | C_het    | -     | -        |
| frameshift deletion  | POTED    | chr21 | 15000762  | 15000765  | AGCC | AGCC     | AGCC     | -_het | AGCC     |
| frameshift insertion | POU5F1B  | chr8  | 128428147 | 128428147 | -    | -        | C_het    | -     | -        |
| frameshift deletion  | PPARGC1B | chr5  | 149206386 | 149206386 | C    | C        | -_het    | C     | C        |
| frameshift insertion | PPFIBP1  | chr12 | 27829483  | 27829483  | -    | -        | T_het    | -     | -        |
| frameshift deletion  | PPIG     | chr2  | 170460581 | 170460581 | T    | T        | -_het    | T     | T        |
| frameshift insertion | PPL      | chr16 | 4944499   | 4944499   | -    | -        | G_het    | -     | -        |
| frameshift deletion  | PPP1R12A | chr12 | 80201042  | 80201042  | T    | T        | -_het    | T     | T        |
| frameshift           | PPP1R15A | chr19 | 49377757  | 49377757  | C    | C        | -_het    | C     | C        |

|                      |         |       |           |           |                                                                                                                                                                    |                       |                       |                                                                                                                                                                       |                                                                                                                                                                    |
|----------------------|---------|-------|-----------|-----------|--------------------------------------------------------------------------------------------------------------------------------------------------------------------|-----------------------|-----------------------|-----------------------------------------------------------------------------------------------------------------------------------------------------------------------|--------------------------------------------------------------------------------------------------------------------------------------------------------------------|
| deletion             |         |       |           |           |                                                                                                                                                                    |                       |                       |                                                                                                                                                                       |                                                                                                                                                                    |
| frameshift deletion  | PPP2R5D | chr6  | 42978677  | 42978677  | C                                                                                                                                                                  | C                     | -_het                 | C                                                                                                                                                                     | C                                                                                                                                                                  |
| frameshift deletion  | PPP6R2  | chr22 | 50882377  | 50882377  | C                                                                                                                                                                  | C                     | -_het                 | C                                                                                                                                                                     | C                                                                                                                                                                  |
| frameshift deletion  | PRAP1   | chr10 | 135160928 | 135160944 | AGGTAATGCCAC<br>CATCC                                                                                                                                              | AGGTAATGCCA<br>CCATCC | AGGTAATGCCA<br>CCATCC | -_het                                                                                                                                                                 | AGGTAATGCCAC<br>CATCC                                                                                                                                              |
| frameshift deletion  | PRB2    | chr12 | 11546611  | 11546611  | G                                                                                                                                                                  | -_het                 | G                     | G                                                                                                                                                                     | G                                                                                                                                                                  |
| frameshift deletion  | PRB3    | chr12 | 11420392  | 11420517  | GGACGAGGTGG<br>GGGACCTTGGA<br>CTGGTTTCCTCCT<br>TGTGGGGGTGGT<br>CCTTCTGGCTTC<br>CTGGACGAGGTG<br>GGGACCTTGAG<br>GTTTGTGCCTCC<br>TTGTGGGGGTGG<br>TCCTTCTGGCTTT<br>CCC | -_het                 | -_het                 | GGACGAGGTG<br>GGGACCTTG<br>GACTGGTTCC<br>TCCTGTGGGG<br>GTGGTCCTTCT<br>GGCTTTCCTGG<br>ACGAGGTGGG<br>GGACCTTGAGG<br>TTTGTGCCTCC<br>TTGTGGGGGTG<br>GTCCTTCTGGC<br>TTTCCC | GGACGAGGTGGG<br>GGACCTTGGA<br>TGGTTTCCTCCTT<br>GTGGGGGTGGTC<br>CTTCTGGCTTTC<br>TGGACGAGGTGG<br>GGGACCTTGAGG<br>TTTGTGCCTCCT<br>TGTGGGGGTGGT<br>CCTTCTGGCTTTC<br>CC |
| frameshift insertion | PRIM2   | chr6  | 57398186  | 57398186  | -                                                                                                                                                                  | -                     | -                     | -                                                                                                                                                                     | A_het                                                                                                                                                              |
| stopgain             | PRKCDBP | chr11 | 6340510   | 6340510   | -                                                                                                                                                                  | -                     | -                     | TCCGGCTGGGC<br>TTCAGCGC_ho<br>m                                                                                                                                       | -                                                                                                                                                                  |
| frameshift deletion  | PRKDC   | chr8  | 48866910  | 48866910  | T                                                                                                                                                                  | T                     | -_hom                 | T                                                                                                                                                                     | T                                                                                                                                                                  |
| frameshift deletion  | PROC    | chr2  | 128186343 | 128186343 | G                                                                                                                                                                  | G                     | -_het                 | G                                                                                                                                                                     | G                                                                                                                                                                  |
| frameshift deletion  | PRR13   | chr12 | 53837317  | 53837317  | C                                                                                                                                                                  | C                     | -_het                 | C                                                                                                                                                                     | C                                                                                                                                                                  |

|                      |        |       |           |           |                                      |                                      |                                      |        |                                      |
|----------------------|--------|-------|-----------|-----------|--------------------------------------|--------------------------------------|--------------------------------------|--------|--------------------------------------|
| frameshift deletion  | PRR21  | chr2  | 240982230 | 240982257 | TGGGTGAAGAGC<br>CGTGGATGAAGG<br>GCCA | TGGGTGAAGA<br>GCCGTGGATGA<br>AGGGCCA | TGGGTGAAGA<br>GCCGTGGATGA<br>AGGGCCA | -_hom  | TGGGTGAAGAGC<br>CGTGGATGAAGG<br>GCCA |
| frameshift insertion | PRRT2  | chr16 | 29825015  | 29825015  | -                                    | -                                    | -                                    | -      | C_hom                                |
| frameshift deletion  | PRRT3  | chr3  | 9990883   | 9990883   | G                                    | G                                    | -_het                                | G      | G                                    |
| frameshift deletion  | PRSS1  | chr7  | 142458842 | 142458842 | T                                    | -_het                                | -_het                                | T      | -_het                                |
| frameshift deletion  | PRSS3  | chr9  | 33794798  | 33794799  | GA                                   | GA                                   | GA                                   | -_het  | GA                                   |
| frameshift insertion | PRSS3  | chr9  | 33797928  | 33797928  | -                                    | CC_het                               | CC_het                               | CC_het | CC_het                               |
| frameshift deletion  | PRSS3  | chr9  | 33797931  | 33797932  | AC                                   | -_het                                | -_het                                | -_het  | -_het                                |
| frameshift deletion  | PSD    | chr10 | 104175781 | 104175781 | G                                    | G                                    | -_het                                | G      | G                                    |
| frameshift deletion  | PSMD1  | chr2  | 232029972 | 232029972 | A                                    | A                                    | -_het                                | A      | A                                    |
| frameshift deletion  | PSME4  | chr2  | 54093345  | 54093345  | T                                    | T                                    | -_het                                | T      | T                                    |
| frameshift deletion  | PSME4  | chr2  | 54115914  | 54115914  | A                                    | A                                    | -_het                                | A      | A                                    |
| frameshift deletion  | PTCHD3 | chr10 | 27702951  | 27702951  | G                                    | G                                    | -_het                                | G      | G                                    |
| frameshift deletion  | PTPN23 | chr3  | 47454399  | 47454399  | G                                    | G                                    | -_hom                                | G      | G                                    |
| frameshift deletion  | PTPN4  | chr2  | 120639371 | 120639371 | T                                    | T                                    | -_het                                | T      | T                                    |
| frameshift deletion  | PYCARD | chr16 | 31213996  | 31213997  | CG                                   | CG                                   | -_het                                | CG     | CG                                   |
| frameshift           | QSER1  | chr11 | 32955078  | 32955078  | A                                    | A                                    | -_het                                | A      | A                                    |

|                      |           |       |           |           |      |      |        |        |       |
|----------------------|-----------|-------|-----------|-----------|------|------|--------|--------|-------|
| deletion             |           |       |           |           |      |      |        |        |       |
| frameshift deletion  | RAB36     | chr22 | 23487615  | 23487615  | G    | G    | -_het  | G      | G     |
| frameshift deletion  | RAD21-AS1 | chr8  | 117887129 | 117887130 | CT   | CT   | CT     | CT     | -_het |
| frameshift deletion  | RAD50     | chr5  | 131931452 | 131931453 | AA   | AA   | -_het  | AA     | AA    |
| frameshift deletion  | RAI1      | chr17 | 17697099  | 17697100  | GC   | GC   | -_het  | -_hom  | -_hom |
| frameshift deletion  | RAI1      | chr17 | 17697102  | 17697102  | G    | G    | G      | -_hom  | -_hom |
| frameshift deletion  | RAI1      | chr17 | 17699359  | 17699359  | C    | C    | -_het  | C      | C     |
| frameshift deletion  | RALGPS1   | chr9  | 129946262 | 129946262 | C    | C    | -_het  | C      | C     |
| frameshift insertion | RB1       | chr13 | 48881488  | 48881488  | -    | -    | AG_het | -      | -     |
| frameshift insertion | RB1       | chr13 | 48955464  | 48955464  | -    | -    | T_het  | -      | -     |
| frameshift insertion | RBM26     | chr13 | 79918806  | 79918806  | -    | -    | T_het  | -      | -     |
| frameshift deletion  | RBM27     | chr5  | 145647320 | 145647320 | A    | A    | -_het  | A      | A     |
| frameshift deletion  | RBM28     | chr7  | 127983764 | 127983764 | C    | C    | -_het  | C      | C     |
| frameshift insertion | RBMX      | chrX  | 135960146 | 135960146 | -    | -    | -      | AA_het | -     |
| frameshift deletion  | RBMXL1    | chr1  | 89449509  | 89449509  | T    | T    | -_hom  | T      | T     |
| frameshift deletion  | RECQL     | chr12 | 21644547  | 21644547  | T    | T    | -_het  | T      | T     |
| frameshift deletion  | RETSAT    | chr2  | 85570875  | 85570878  | AGAT | AGAT | AGAT   | -_het  | AGAT  |

|                      |        |       |           |           |                                                             |                                                                 |                                                                 |                                                                 |       |
|----------------------|--------|-------|-----------|-----------|-------------------------------------------------------------|-----------------------------------------------------------------|-----------------------------------------------------------------|-----------------------------------------------------------------|-------|
| frameshift deletion  | RFC3   | chr13 | 34398063  | 34398063  | A                                                           | A                                                               | -_het                                                           | A                                                               | A     |
| frameshift insertion | RGS12  | chr4  | 3432430   | 3432430   | -                                                           | -                                                               | C_het                                                           | -                                                               | -     |
| frameshift deletion  | RHBDD2 | chr7  | 75517566  | 75517566  | C                                                           | C                                                               | -_het                                                           | C                                                               | C     |
| frameshift deletion  | RIMKLB | chr12 | 8930200   | 8930200   | A                                                           | A                                                               | -_het                                                           | A                                                               | A     |
| frameshift insertion | RNF103 | chr2  | 86831014  | 86831014  | -                                                           | -                                                               | T_het                                                           | -                                                               | -     |
| frameshift deletion  | RNF139 | chr8  | 125498508 | 125498509 | AT                                                          | AT                                                              | -_het                                                           | AT                                                              | AT    |
| frameshift deletion  | RNF43  | chr17 | 56435161  | 56435161  | C                                                           | C                                                               | -_hom                                                           | C                                                               | C     |
| frameshift deletion  | ROBO1  | chr3  | 78710235  | 78710235  | A                                                           | A                                                               | -_hom                                                           | A                                                               | A     |
| frameshift deletion  | ROCK2  | chr2  | 11355500  | 11355500  | T                                                           | T                                                               | -_het                                                           | T                                                               | T     |
| frameshift deletion  | ROM1   | chr11 | 62381084  | 62381084  | G                                                           | G                                                               | -_het                                                           | G                                                               | G     |
| frameshift deletion  | RP1L1  | chr8  | 10467587  | 10467587  | T                                                           | T                                                               | T                                                               | T                                                               | -_hom |
| frameshift deletion  | RP1L1  | chr8  | 10467591  | 10467637  | CTCTAACTGCACC<br>CCCTCTTCTTGCA<br>GCCCTTCTTCTGT<br>TTTAGTTT | CTCTAACTGCA<br>CCCCCTCTTCTT<br>GCAGCCCTTCT<br>TCTGTTTTAGTT<br>T | CTCTAACTGCA<br>CCCCCTCTTCTT<br>GCAGCCCTTCT<br>TCTGTTTTAGTT<br>T | CTCTAACTGCA<br>CCCCCTCTTCTT<br>GCAGCCCTTCT<br>TCTGTTTTAGTT<br>T | -_hom |
| frameshift insertion | RPL18  | chr19 | 49120252  | 49120252  | -                                                           | A_het                                                           | -                                                               | A_het                                                           | -     |
| frameshift deletion  | RPL18  | chr19 | 49120253  | 49120253  | A                                                           | A                                                               | -_hom                                                           | A                                                               | A     |
| frameshift insertion | RPL22  | chr1  | 6257784   | 6257784   | -                                                           | -                                                               | T_het                                                           | -                                                               | -     |



|                      |           |       |           |           |                                                             |        |                                                                 |                                                                 |                                                              |
|----------------------|-----------|-------|-----------|-----------|-------------------------------------------------------------|--------|-----------------------------------------------------------------|-----------------------------------------------------------------|--------------------------------------------------------------|
| frameshift insertion | RPL23AP32 | chr2  | 54756587  | 54756587  | -                                                           | -      | A_het                                                           | -                                                               | -                                                            |
| frameshift deletion  | RPL2B     | chr16 | 436727    | 436728    | AA                                                          | AA     | -_hom                                                           | AA                                                              | -_hom                                                        |
| frameshift deletion  | RRP7A     | chr22 | 42912343  | 42912343  | T                                                           | T      | -_hom                                                           | T                                                               | T                                                            |
| frameshift deletion  | RSPO3     | chr6  | 127516969 | 127516969 | A                                                           | A      | -_het                                                           | A                                                               | A                                                            |
| stopgain             | RTN4      | chr2  | 55253746  | 55253746  | T                                                           | T      | -_het                                                           | T                                                               | T                                                            |
| frameshift insertion | RUNX1-IT1 | chr21 | 36410910  | 36410910  | -                                                           | -      | -                                                               | TG_het                                                          | -                                                            |
| frameshift deletion  | RUNX1-IT1 | chr21 | 36410911  | 36410912  | TG                                                          | TG     | TG                                                              | TG                                                              | -_het                                                        |
| frameshift deletion  | RUSC2     | chr9  | 35547399  | 35547399  | C                                                           | C      | -_het                                                           | C                                                               | C                                                            |
| frameshift deletion  | SALL3     | chr18 | 76755299  | 76755299  | C                                                           | C      | -_het                                                           | C                                                               | C                                                            |
| frameshift deletion  | SAMD11    | chr1  | 874779    | 874826    | CCTCCCAGCCAC<br>GGTGAGGACCCA<br>CCCTGGCATGAT<br>CCCCCTCATCA | -_hom  | CCTCCCAGCC<br>ACGGTGAGGAC<br>CCACCCTGGCA<br>TGATCCCCCTCA<br>TCA | CCTCCCAGCC<br>ACGGTGAGGAC<br>CCACCCTGGCA<br>TGATCCCCCTCA<br>TCA | CCTCCCAGCCAC<br>GGTGAGGACCCA<br>CCCTGGCATGATC<br>CCCCCTCATCA |
| frameshift deletion  | SAMD15    | chr14 | 77844152  | 77844155  | AAAG                                                        | AAAG   | AAAG                                                            | -_het                                                           | AAAG                                                         |
| frameshift deletion  | SARM1     | chr17 | 26699206  | 26699206  | A                                                           | -_hom  | -_hom                                                           | -_hom                                                           | -_hom                                                        |
| frameshift insertion | SARM1     | chr17 | 26708298  | 26708298  | -                                                           | GC_hom | GC_hom                                                          | GC_hom                                                          | GC_hom                                                       |
| frameshift deletion  | SARM1     | chr17 | 26708303  | 26708304  | GT                                                          | -_hom  | -_hom                                                           | -_hom                                                           | -_hom                                                        |
| frameshift deletion  | SDF4      | chr1  | 1153102   | 1153102   | T                                                           | T      | -_het                                                           | T                                                               | T                                                            |

|                      |          |       |           |           |    |           |       |       |        |
|----------------------|----------|-------|-----------|-----------|----|-----------|-------|-------|--------|
| frameshift deletion  | SDHA     | chr5  | 251704    | 251704    | G  | G         | G     | -_het | G      |
| frameshift deletion  | SDHA     | chr5  | 256484    | 256485    | TT | TT        | TT    | -_het | -_het  |
| frameshift deletion  | SEC16B   | chr1  | 177927333 | 177927333 | G  | G         | -_het | G     | G      |
| frameshift deletion  | SEC31A   | chr4  | 83785565  | 83785565  | T  | T         | -_het | T     | T      |
| frameshift deletion  | SEC63    | chr6  | 108214755 | 108214755 | T  | T         | -_hom | T     | T      |
| frameshift deletion  | SETD1B   | chr12 | 122242658 | 122242659 | CC | CC        | -_het | CC    | CC     |
| frameshift deletion  | SETD7    | chr4  | 140432892 | 140432892 | G  | G         | -_het | G     | G      |
| frameshift deletion  | SEZ6L    | chr22 | 26702008  | 26702008  | A  | A         | -_het | A     | A      |
| frameshift deletion  | SGOL2    | chr2  | 201437004 | 201437004 | T  | T         | -_het | T     | T      |
| frameshift deletion  | SHC1     | chr1  | 154938890 | 154938890 | C  | C         | -_het | C     | C      |
| frameshift deletion  | SHISA7   | chr19 | 55945040  | 55945040  | C  | C         | -_het | C     | C      |
| frameshift deletion  | SIGLEC10 | chr19 | 51919435  | 51919436  | AA | AA        | -_hom | AA    | AA     |
| frameshift insertion | SIRPA    | chr20 | 1895949   | 1895949   | -  | -         | -     | -     | GT_hom |
| frameshift deletion  | SIRPA    | chr20 | 1895951   | 1895952   | CT | CT        | CT    | CT    | -_hom  |
| frameshift deletion  | SIRPB1   | chr20 | 1592151   | 1592152   | GA | GA        | GA    | GA    | -_hom  |
| frameshift insertion | SIRPB1   | chr20 | 1592154   | 1592154   | -  | -         | -     | -     | AC_hom |
| frameshift           | SKA3     | chr13 | 21732264  | 21732264  | -  | CAAAG_het | -     | -     | -      |

|                      |          |       |           |           |                                                                                   |                                                                                   |        |                                                                                   |                                                                                   |
|----------------------|----------|-------|-----------|-----------|-----------------------------------------------------------------------------------|-----------------------------------------------------------------------------------|--------|-----------------------------------------------------------------------------------|-----------------------------------------------------------------------------------|
| insertion            |          |       |           |           |                                                                                   |                                                                                   |        |                                                                                   |                                                                                   |
| frameshift insertion | SLAIN1   | chr13 | 78272267  | 78272267  | -                                                                                 | GG_hom                                                                            | GG_hom | -                                                                                 | GG_hom                                                                            |
| frameshift insertion | SLC16A1  | chr1  | 113460185 | 113460185 | -                                                                                 | -                                                                                 | A_het  | -                                                                                 | -                                                                                 |
| frameshift insertion | SLC16A4  | chr1  | 110906426 | 110906426 | -                                                                                 | -                                                                                 | A_het  | -                                                                                 | -                                                                                 |
| frameshift deletion  | SLC19A2  | chr1  | 169446809 | 169446809 | A                                                                                 | A                                                                                 | -_het  | A                                                                                 | A                                                                                 |
| frameshift insertion | SLC22A2  | chr6  | 160679656 | 160679656 | -                                                                                 | -                                                                                 | T_hom  | -                                                                                 | -                                                                                 |
| frameshift deletion  | SLC22A20 | chr11 | 64981489  | 64981489  | A                                                                                 | A                                                                                 | -_het  | A                                                                                 | A                                                                                 |
| frameshift insertion | SLC22A25 | chr11 | 62996774  | 62996774  | -                                                                                 | -                                                                                 | -      | A_hom                                                                             | -                                                                                 |
| frameshift deletion  | SLC22A8  | chr11 | 62763397  | 62763397  | A                                                                                 | A                                                                                 | A      | A                                                                                 | -_het                                                                             |
| frameshift insertion | SLC25A5  | chrX  | 118603706 | 118603706 | -                                                                                 | -                                                                                 | G_het  | G_het                                                                             | G_het                                                                             |
| frameshift deletion  | SLC25A5  | chrX  | 118603962 | 118603962 | T                                                                                 | T                                                                                 | -_het  | -_het                                                                             | T                                                                                 |
| frameshift deletion  | SLC27A4  | chr9  | 131112835 | 131112835 | C                                                                                 | C                                                                                 | -_het  | C                                                                                 | C                                                                                 |
| frameshift deletion  | SLC35G2  | chr3  | 136573486 | 136573486 | A                                                                                 | A                                                                                 | -_hom  | A                                                                                 | A                                                                                 |
| frameshift deletion  | SLC38A10 | chr17 | 79225014  | 79225074  | TTTAAAGGGGAG<br>CAAGGGAGATAA<br>AACGGTAATCAC<br>AAGCCATGTGAC<br>GATGCCGCAGGT<br>G | TTTAAAGGGGA<br>GCAAGGGAGA<br>TAAAACGGTAA<br>TCACAAGCCAT<br>GTGACGATGCC<br>GCAGGTG | -_het  | TTTAAAGGGGA<br>GCAAGGGAGA<br>TAAAACGGTAA<br>TCACAAGCCAT<br>GTGACGATGCC<br>GCAGGTG | TTTAAAGGGGAG<br>CAAGGGAGATAA<br>AACGGTAATCAC<br>AAGCCATGTGAC<br>GATGCCGCAGGT<br>G |
| frameshift           | SLC6A10P | chr16 | 32890641  | 32890641  | -                                                                                 | -                                                                                 | -      | A_het                                                                             | -                                                                                 |

|                      |         |       |           |           |      |       |       |       |       |
|----------------------|---------|-------|-----------|-----------|------|-------|-------|-------|-------|
| insertion            |         |       |           |           |      |       |       |       |       |
| frameshift deletion  | SLC6A6  | chr3  | 14485478  | 14485479  | CC   | CC    | CC    | -_het | CC    |
| frameshift deletion  | SLC7A13 | chr8  | 87242135  | 87242135  | A    | A     | -_het | A     | A     |
| frameshift deletion  | SLC8A2  | chr19 | 47969003  | 47969003  | A    | A     | -_het | A     | A     |
| frameshift deletion  | SLC9A8  | chr20 | 48467301  | 48467301  | T    | T     | -_het | T     | T     |
| frameshift deletion  | SLC9B1  | chr4  | 103822483 | 103822484 | AC   | AC    | -_het | -_het | -_het |
| frameshift insertion | SLC9B1  | chr4  | 103870488 | 103870488 | -    | -     | A_het | -     | -     |
| frameshift insertion | SLC9B2  | chr4  | 103941529 | 103941529 | -    | A_het | -     | -     | -     |
| frameshift deletion  | SLFN12  | chr17 | 33749493  | 33749493  | A    | A     | -_het | A     | A     |
| frameshift insertion | SLITRK1 | chr13 | 84455508  | 84455508  | -    | -     | T_het | -     | -     |
| frameshift deletion  | SMAD4   | chr18 | 48604788  | 48604791  | ACGA | ACGA  | ACGA  | -_hom | ACGA  |
| frameshift deletion  | SMAP1   | chr6  | 71508370  | 71508371  | AA   | AA    | -_het | AA    | AA    |
| frameshift insertion | SNAPC5  | chr15 | 66782790  | 66782790  | -    | -     | T_het | -     | -     |
| frameshift deletion  | SNRNP40 | chr1  | 31732603  | 31732606  | AAAA | AAAA  | -_hom | AAAA  | AAAA  |
| frameshift deletion  | SNRNP40 | chr1  | 31732678  | 31732678  | A    | A     | -_het | A     | A     |
| frameshift deletion  | SNX13   | chr7  | 17922565  | 17922566  | CT   | -_het | CT    | CT    | CT    |
| frameshift deletion  | SNX27   | chr1  | 151584936 | 151584936 | G    | G     | -_het | G     | G     |

|                      |           |       |           |           |      |       |                                      |       |          |
|----------------------|-----------|-------|-----------|-----------|------|-------|--------------------------------------|-------|----------|
| frameshift insertion | SOGA2     | chr18 | 8786108   | 8786108   | -    | -     | -                                    | -     | CCCC_hom |
| frameshift insertion | SOGA2     | chr18 | 8786117   | 8786117   | -    | -     | A_hom                                | -     | -        |
| frameshift insertion | SOGA2     | chr18 | 8793003   | 8793003   | -    | -     | C_het                                | -     | -        |
| frameshift deletion  | SOS2      | chr14 | 50623682  | 50623685  | TATA | TATA  | TATA                                 | -_het | TATA     |
| frameshift deletion  | SPANXN1   | chrX  | 144337333 | 144337334 | GA   | GA    | GA                                   | -_hom | GA       |
| frameshift insertion | SPG11     | chr15 | 44912608  | 44912608  | -    | -     | A_het                                | -     | -        |
| frameshift deletion  | SPINK5    | chr5  | 147499875 | 147499875 | A    | A     | -_het                                | A     | A        |
| frameshift deletion  | SQLE      | chr8  | 126011893 | 126011893 | C    | C     | -_het                                | C     | C        |
| frameshift insertion | SRMS      | chr20 | 62175647  | 62175647  | -    | -     | G_het                                | -     | -        |
| frameshift insertion | SRRT      | chr7  | 100479331 | 100479331 | -    | -     | G_het                                | -     | -        |
| frameshift deletion  | SSPO      | chr7  | 149518533 | 149518533 | C    | C     | -_het                                | C     | C        |
| stopgain             | SSTR1     | chr14 | 38679763  | 38679763  | -    | -     | GCTCTGAGCCC<br>GGGCCACGCAG<br>GG_hom | -     | -        |
| frameshift insertion | SSTR5-AS1 | chr16 | 1115493   | 1115493   | -    | -     | T_het                                | -     | -        |
| frameshift deletion  | SSTR5-AS1 | chr16 | 1115843   | 1115846   | GGCA | -_het | GGCA                                 | GGCA  | GGCA     |
| frameshift insertion | SSTR5-AS1 | chr16 | 1116220   | 1116220   | -    | G_hom | G_hom                                | G_hom | G_hom    |
| frameshift           | ST18      | chr8  | 53074085  | 53074085  | -    | -     | T_het                                | -     | -        |

|                      |         |       |           |           |                      |                       |                       |                       |                   |  |
|----------------------|---------|-------|-----------|-----------|----------------------|-----------------------|-----------------------|-----------------------|-------------------|--|
| insertion            |         |       |           |           |                      |                       |                       |                       |                   |  |
| frameshift deletion  | STAB2   | chr12 | 103981277 | 103981277 | T                    | T                     | -_het                 | T                     | T                 |  |
| frameshift deletion  | STAC3   | chr12 | 57637343  | 57637343  | T                    | T                     | T                     | T                     | -_het             |  |
| frameshift deletion  | STARD9  | chr15 | 42977254  | 42977254  | A                    | A                     | -_het                 | A                     | A                 |  |
| frameshift deletion  | STRC    | chr15 | 43893734  | 43893734  | G                    | G                     | -_het                 | G                     | G                 |  |
| frameshift deletion  | STXBP2  | chr19 | 7704893   | 7704894   | TG                   | TG                    | TG                    | TG                    | -_het             |  |
| frameshift deletion  | STXBP2  | chr19 | 7705384   | 7705397   | ATCTGTGTGTGTGT<br>GT | ATCTGTGTGTGT<br>TGT   | -_hom                 | ATCTGTGTGTGT<br>TGT   | ATCTGTGTGTGT<br>T |  |
| frameshift insertion | SULT1C3 | chr2  | 108863684 | 108863684 | -                    | -                     | A_het                 | -                     | -                 |  |
| stopgain             | SYCP2   | chr20 | 58444990  | 58444990  | T                    | T                     | -_het                 | T                     | T                 |  |
| stopgain             | SYCP2   | chr20 | 58467047  | 58467047  | T                    | T                     | -_het                 | T                     | T                 |  |
| frameshift deletion  | SYNE1   | chr6  | 152688162 | 152688177 | AAACATCCGGGG<br>TCAG | AAACATCCGGGG<br>GTCAG | AAACATCCGGGG<br>GTCAG | AAACATCCGGGG<br>GTCAG | -_het             |  |
| frameshift deletion  | T       | chr6  | 166576104 | 166576104 | C                    | C                     | -_het                 | C                     | C                 |  |
| frameshift deletion  | TAF1B   | chr2  | 9989571   | 9989571   | A                    | A                     | -_het                 | A                     | A                 |  |
| frameshift insertion | TAS2R43 | chr12 | 11244067  | 11244067  | -                    | TT_het                | TT_hom                | -                     | -                 |  |
| frameshift deletion  | TAS2R43 | chr12 | 11244071  | 11244072  | CC                   | -_het                 | -_hom                 | CC                    | CC                |  |
| frameshift deletion  | TBC1D1  | chr4  | 38051454  | 38051454  | G                    | G                     | -_het                 | G                     | G                 |  |
| frameshift deletion  | TBC1D23 | chr3  | 100039736 | 100039736 | A                    | A                     | -_hom                 | A                     | A                 |  |
| frameshift           | TBCK    | chr4  | 107156505 | 107156505 | T                    | T                     | -_het                 | T                     | T                 |  |

|                      |           |       |           |           |    |          |        |        |        |
|----------------------|-----------|-------|-----------|-----------|----|----------|--------|--------|--------|
| deletion             |           |       |           |           |    |          |        |        |        |
| frameshift deletion  | TBXAS1    | chr7  | 139662016 | 139662016 | T  | T        | -_het  | T      | T      |
| frameshift insertion | TCEB3CL2  | chr18 | 44549025  | 44549025  | -  | -        | GC_het | -      | -      |
| frameshift deletion  | TCF7L1    | chr2  | 85360831  | 85360831  | C  | C        | -_het  | C      | C      |
| frameshift deletion  | TCF7L1    | chr2  | 85360833  | 85360834  | GC | GC       | -_het  | GC     | GC     |
| frameshift deletion  | TCHP      | chr12 | 110344435 | 110344435 | A  | A        | -_het  | A      | A      |
| frameshift deletion  | TCP11     | chr6  | 35108990  | 35108990  | C  | -_het    | C      | C      | C      |
| stopgain             | TCRAVN1   | chr14 | 22580859  | 22580859  | G  | G        | G      | -_het  | G      |
| frameshift insertion | TCRBV12S2 | chr7  | 142231793 | 142231793 | -  | T_het    | -      | T_het  | T_het  |
| frameshift deletion  | TCRBV12S2 | chr7  | 142231797 | 142231798 | CA | -_het    | CA     | -_het  | -_het  |
| frameshift insertion | TCRBV12S2 | chr7  | 142231800 | 142231800 | -  | A_het    | -      | A_het  | A_het  |
| frameshift insertion | TCRBV12S2 | chr7  | 142231805 | 142231805 | -  | TG_het   | TG_het | TG_het | TG_het |
| frameshift deletion  | TCRBV12S2 | chr7  | 142231809 | 142231810 | CC | -_het    | -_het  | -_het  | -_het  |
| frameshift deletion  | TCRBV13S1 | chr7  | 142180585 | 142180586 | CC | -_het    | CC     | CC     | CC     |
| frameshift deletion  | TCRBV13S1 | chr7  | 142180592 | 142180593 | GG | -_het    | GG     | GG     | GG     |
| frameshift insertion | TCRBV13S1 | chr7  | 142180593 | 142180593 | -  | TTTT_het | -      | -      | -      |
| frameshift insertion | TCRBV20S1 | chr7  | 142032391 | 142032391 | -  | AC_het   | -      | -      | -      |

|                      |                   |      |           |           |    |        |        |        |        |
|----------------------|-------------------|------|-----------|-----------|----|--------|--------|--------|--------|
| frameshift deletion  | TCRBV21S1         | chr7 | 142223949 | 142223950 | AC | AC     | -_het  | AC     | AC     |
| frameshift insertion | TCRBV21S1         | chr7 | 142223953 | 142223953 | -  | -      | TC_het | -      | -      |
| frameshift insertion | TCRBV21S1         | chr7 | 142224020 | 142224020 | -  | -      | -      | -      | TT_het |
| frameshift deletion  | TCRBV21S1         | chr7 | 142224022 | 142224023 | CA | CA     | CA     | CA     | -_het  |
| frameshift deletion  | TCRBV5S6A3N2<br>T | chr7 | 142168509 | 142168509 | C  | -_het  | -_het  | C      | -_het  |
| frameshift insertion | TCRBV5S6A3N2<br>T | chr7 | 142168515 | 142168515 | -  | C_het  | C_het  | -      | C_het  |
| frameshift deletion  | TCRBV6S1A1N1      | chr7 | 142247530 | 142247531 | GC | -_het  | GC     | -_het  | -_het  |
| frameshift insertion | TCRBV6S1A1N1      | chr7 | 142247535 | 142247535 | -  | AA_het | AA_het | AA_het | AA_het |
| frameshift deletion  | TCRBV6S1A1N1      | chr7 | 142247539 | 142247540 | TG | -_het  | TG     | TG     | -_het  |
| frameshift insertion | TCRBV6S1A1N1      | chr7 | 142247541 | 142247541 | -  | AT_het | -      | -      | AT_het |
| frameshift deletion  | TCRBV6S3A1N1<br>T | chr7 | 142139335 | 142139335 | G  | -_het  | G      | -_het  | -_het  |
| frameshift insertion | TCRBV6S3A1N1<br>T | chr7 | 142139337 | 142139337 | -  | CA_het | -      | CA_het | CA_het |
| frameshift deletion  | TCRBV6S3A1N1<br>T | chr7 | 142139340 | 142139340 | A  | -_het  | A      | -_het  | -_het  |
| frameshift deletion  | TCRBV6S6A2T       | chr7 | 142119877 | 142119877 | G  | -_het  | G      | -_het  | G      |
| frameshift insertion | TCRBV6S6A2T       | chr7 | 142119879 | 142119879 | -  | CA_het | -      | CA_het | -      |
| frameshift deletion  | TCRBV6S6A2T       | chr7 | 142119882 | 142119882 | A  | -_het  | A      | -_het  | A      |
| frameshift           | TCRBV9S1A1T       | chr7 | 142008635 | 142008636 | CG | -_het  | CG     | CG     | CG     |



|                      |             |       |           |           |    |        |        |       |       |
|----------------------|-------------|-------|-----------|-----------|----|--------|--------|-------|-------|
| deletion             |             |       |           |           |    |        |        |       |       |
| frameshift insertion | TCRBV9S1A1T | chr7  | 142008639 | 142008639 | -  | GG_het | GG_het | -     | -     |
| frameshift deletion  | TENC1       | chr12 | 53453019  | 53453019  | C  | C      | -_het  | C     | C     |
| frameshift insertion | TEP1        | chr14 | 20846337  | 20846337  | -  | -      | C_het  | -     | -     |
| frameshift deletion  | TEX13A      | chrX  | 104464282 | 104464282 | C  | -_hom  | -_hom  | -_hom | -_hom |
| frameshift deletion  | TFAM        | chr10 | 60148570  | 60148570  | A  | A      | -_het  | A     | A     |
| frameshift deletion  | TGFB2       | chr1  | 218578727 | 218578728 | CT | CT     | -_het  | CT    | CT    |
| frameshift deletion  | TGFBR2      | chr3  | 30691872  | 30691872  | A  | A      | -_hom  | A     | A     |
| frameshift deletion  | TIE1        | chr1  | 43779725  | 43779726  | TG | -_het  | -_het  | TG    | TG    |
| frameshift deletion  | TLCD2       | chr17 | 1613129   | 1613130   | GC | GC     | -_hom  | GC    | GC    |
| stopgain             | TLR2        | chr4  | 154624834 | 154624834 | G  | G      | G      | G     | -_het |
| frameshift deletion  | TLR4        | chr9  | 120470861 | 120470861 | T  | -_het  | T      | T     | T     |
| frameshift deletion  | TMCC3       | chr12 | 94976258  | 94976258  | C  | C      | -_het  | C     | C     |
| frameshift deletion  | TMEM131     | chr2  | 98378554  | 98378554  | G  | G      | -_het  | G     | G     |
| frameshift deletion  | TMEM185B    | chr2  | 120979531 | 120979531 | G  | G      | -_het  | G     | G     |
| frameshift insertion | TMEM2       | chr9  | 74324369  | 74324369  | -  | -      | A_het  | -     | -     |

|                      |          |       |           |           |                                                                                                            |                            |                            |                                                                                                               |                                                                                                            |
|----------------------|----------|-------|-----------|-----------|------------------------------------------------------------------------------------------------------------|----------------------------|----------------------------|---------------------------------------------------------------------------------------------------------------|------------------------------------------------------------------------------------------------------------|
| frameshift deletion  | TMEM255B | chr13 | 114503876 | 114503957 | CCTGCGGGAGGT<br>GAGGGGCACCG<br>GGGACCCCCATA<br>TCTACACCTGCG<br>GGAGGTGAGGG<br>GCGCTGGGGACC<br>CCCGTATCTACA | -_hom                      | -_hom                      | CCTGCGGGAGG<br>TGAGGGGCACC<br>GGGACCCCCA<br>TATCTACACCTG<br>CGGGAGGTGA<br>GGGGCGCTGG<br>GGACCCCCGTA<br>TCTACA | CCTGCGGGAGGT<br>GAGGGGCACCGG<br>GGACCCCCATATC<br>TACACCTGCGGG<br>AGGTGAGGGGCG<br>CTGGGGACCCCC<br>GTATCTACA |
| frameshift insertion | TMEM260  | chr14 | 57052611  | 57052611  | -                                                                                                          | -                          | T_het                      | -                                                                                                             | -                                                                                                          |
| frameshift deletion  | TMEM65   | chr8  | 125384238 | 125384259 | AGCCGCCTGGGG<br>CCGCCCGGCA                                                                                 | AGCCGCCTGGG<br>GCCGCCCGGCA | AGCCGCCTGGG<br>GCCGCCCGGCA | AGCCGCCTGGG<br>GCCGCCCGGCA                                                                                    | -_hom                                                                                                      |
| frameshift deletion  | TMEM97   | chr17 | 26653807  | 26653807  | A                                                                                                          | A                          | -_hom                      | A                                                                                                             | A                                                                                                          |
| frameshift deletion  | TMPO     | chr12 | 98921672  | 98921672  | A                                                                                                          | A                          | -_het                      | A                                                                                                             | A                                                                                                          |
| frameshift deletion  | TMPRSS5  | chr11 | 113567641 | 113567641 | G                                                                                                          | G                          | G                          | G                                                                                                             | -_het                                                                                                      |
| frameshift deletion  | TNFAIP6  | chr2  | 152236046 | 152236049 | AAAA                                                                                                       | AAAA                       | -_het                      | AAAA                                                                                                          | AAAA                                                                                                       |
| frameshift deletion  | TNK2     | chr3  | 195594633 | 195594633 | G                                                                                                          | G                          | -_het                      | G                                                                                                             | G                                                                                                          |
| frameshift insertion | TNK2     | chr3  | 195595228 | 195595228 | -                                                                                                          | -                          | G_hom                      | -                                                                                                             | -                                                                                                          |
| frameshift deletion  | TNMD     | chrX  | 99854070  | 99854070  | A                                                                                                          | A                          | -_hom                      | A                                                                                                             | A                                                                                                          |
| frameshift deletion  | TNRC6B   | chr22 | 40669453  | 40669453  | G                                                                                                          | G                          | -_het                      | G                                                                                                             | G                                                                                                          |
| frameshift deletion  | TOM1L2   | chr17 | 17772623  | 17772623  | A                                                                                                          | A                          | A                          | A                                                                                                             | -_het                                                                                                      |
| frameshift deletion  | TOR2A    | chr9  | 130495628 | 130495628 | C                                                                                                          | C                          | -_het                      | C                                                                                                             | C                                                                                                          |

|                      |         |       |           |           |    |    |       |        |       |
|----------------------|---------|-------|-----------|-----------|----|----|-------|--------|-------|
| frameshift deletion  | TP53    | chr17 | 7579394   | 7579394   | G  | G  | G     | G      | -_hom |
| frameshift insertion | TP73    | chr1  | 3644315   | 3644315   | -  | -  | G_het | -      | -     |
| frameshift deletion  | TPM3    | chr1  | 154144892 | 154144892 | T  | T  | -_het | T      | T     |
| frameshift deletion  | TPMT    | chr6  | 18134009  | 18134010  | AA | AA | -_het | AA     | AA    |
| frameshift deletion  | TRAM1L1 | chr4  | 118005517 | 118005517 | T  | T  | -_het | T      | T     |
| frameshift deletion  | TRDN    | chr6  | 123786033 | 123786033 | A  | A  | -_het | A      | A     |
| frameshift deletion  | TRERF1  | chr6  | 42237001  | 42237001  | C  | C  | -_het | C      | C     |
| frameshift deletion  | TRIM22  | chr11 | 5717765   | 5717765   | A  | A  | -_het | A      | A     |
| frameshift deletion  | TRIM51  | chr11 | 55653610  | 55653610  | A  | A  | -_het | A      | A     |
| frameshift insertion | TRIM77  | chr11 | 89444610  | 89444610  | -  | -  | A_het | -      | -     |
| frameshift deletion  | TSPYL2  | chrX  | 53113896  | 53113897  | GG | GG | -_hom | GG     | GG    |
| frameshift insertion | TSPYL2  | chrX  | 53115502  | 53115502  | -  | -  | -     | CC_hom | -     |
| frameshift deletion  | TTC3    | chr21 | 38524243  | 38524244  | AA | AA | -_het | AA     | AA    |
| frameshift deletion  | TTC39A  | chr1  | 51767913  | 51767913  | C  | C  | -_hom | C      | C     |
| frameshift deletion  | TTK     | chr6  | 80751910  | 80751910  | A  | A  | -_het | A      | A     |
| frameshift deletion  | TTLL10  | chr1  | 1116223   | 1116223   | G  | G  | -_hom | G      | G     |
| frameshift           | TTLL13  | chr15 | 90799090  | 90799090  | -  | -  | -     | -      | C_het |

|                      |         |       |           |           |                                      |                       |                                      |                                      |        |
|----------------------|---------|-------|-----------|-----------|--------------------------------------|-----------------------|--------------------------------------|--------------------------------------|--------|
| insertion            |         |       |           |           |                                      |                       |                                      |                                      |        |
| frameshift insertion | TTN     | chr2  | 179527086 | 179527086 | -                                    | -                     | T_het                                | -                                    | -      |
| frameshift deletion  | TUBA3D  | chr2  | 132237787 | 132237787 | C                                    | C                     | -_het                                | C                                    | C      |
| frameshift insertion | TUBA8   | chr22 | 18613684  | 18613684  | -                                    | -                     | -                                    | -                                    | AT_het |
| frameshift deletion  | TUBA8   | chr22 | 18613688  | 18613689  | AG                                   | AG                    | AG                                   | AG                                   | -_het  |
| frameshift deletion  | TUBB8   | chr10 | 93444     | 93444     | A                                    | A                     | -_het                                | A                                    | A      |
| frameshift deletion  | TUBGCP4 | chr15 | 43678086  | 43678086  | A                                    | A                     | -_het                                | A                                    | A      |
| frameshift deletion  | TVP23A  | chr16 | 10867203  | 10867203  | A                                    | A                     | -_hom                                | A                                    | A      |
| frameshift deletion  | TXNDC5  | chr6  | 7891867   | 7891868   | AC                                   | AC                    | -_het                                | AC                                   | AC     |
| frameshift deletion  | UBA5    | chr3  | 132394449 | 132394449 | A                                    | A                     | -_het                                | A                                    | A      |
| frameshift deletion  | UBR5    | chr8  | 103289349 | 103289349 | T                                    | T                     | -_het                                | T                                    | T      |
| frameshift deletion  | UBXN11  | chr1  | 26608826  | 26608832  | GGGGCCG                              | GGGGCCG               | -_hom                                | -_hom                                | -_het  |
| frameshift deletion  | UBXN11  | chr1  | 26608836  | 26608852  | CCGGGACCGGGA<br>CTGGG                | CCGGGACCGG<br>GACTGGG | -_hom                                | -_hom                                | -_het  |
| frameshift deletion  | UBXN11  | chr1  | 26608866  | 26608867  | CC                                   | -_hom                 | CC                                   | CC                                   | -_het  |
| frameshift deletion  | UBXN11  | chr1  | 26608869  | 26608896  | GGACTGGGGCCG<br>GGACCGGGACCG<br>GGAC | -_hom                 | GGACTGGGGC<br>CGGGACCGGG<br>ACCGGGAC | GGACTGGGGCC<br>GGGACCGGGA<br>CCGGGAC | -_het  |
| frameshift deletion  | UGT1A3  | chr2  | 234638283 | 234638283 | T                                    | T                     | -_het                                | T                                    | T      |

|                      |       |       |           |           |                                                                                                                     |            |                                                                                                                         |                                                                                                                         |                                                                                                                    |
|----------------------|-------|-------|-----------|-----------|---------------------------------------------------------------------------------------------------------------------|------------|-------------------------------------------------------------------------------------------------------------------------|-------------------------------------------------------------------------------------------------------------------------|--------------------------------------------------------------------------------------------------------------------|
| frameshift insertion | UNC80 | chr2  | 210778534 | 210778534 | -                                                                                                                   | -          | T_het                                                                                                                   | -                                                                                                                       | -                                                                                                                  |
| frameshift deletion  | UNKL  | chr16 | 1447265   | 1447351   | CCCCGTGCTTCAC<br>ACTGGGGCAGG<br>GCGTGGACCTGG<br>GGATGAGGAGG<br>TGTCAGGGGGAC<br>ACAGAGGACTTG<br>GCTCCCCGCCCCC<br>CAC | -_hom      | CCCCGTGCTTC<br>ACACTGGGGCA<br>GGGCGTGGAC<br>CTGGGGATGA<br>GGAGGTGTCA<br>GGGGGACACA<br>GAGGACTTGGC<br>TCCCCGCCCCC<br>CAC | CCCCGTGCTTC<br>ACACTGGGGCA<br>GGGCGTGGACC<br>TGGGGATGAG<br>GAGGTGTCAGG<br>GGGACACAGA<br>GGACTTGGCTC<br>CCCCGCCCCCA<br>C | CCCCGTGCTTCAC<br>ACTGGGGCAGGG<br>CGTGGACCTGGG<br>GATGAGGAGGTG<br>TCAGGGGGACAC<br>AGAGGACTTGGC<br>TCCCCGCCCCCA<br>C |
| frameshift deletion  | UPF3A | chr13 | 115057211 | 115057211 | A                                                                                                                   | A          | -_het                                                                                                                   | A                                                                                                                       | A                                                                                                                  |
| frameshift deletion  | USP1  | chr1  | 62910505  | 62910505  | A                                                                                                                   | A          | -_het                                                                                                                   | A                                                                                                                       | A                                                                                                                  |
| frameshift insertion | USP13 | chr3  | 179472610 | 179472610 | -                                                                                                                   | -          | C_het                                                                                                                   | -                                                                                                                       | -                                                                                                                  |
| frameshift deletion  | USP35 | chr11 | 77911710  | 77911710  | C                                                                                                                   | C          | -_het                                                                                                                   | C                                                                                                                       | C                                                                                                                  |
| frameshift deletion  | USP35 | chr11 | 77920856  | 77920856  | C                                                                                                                   | C          | -_het                                                                                                                   | C                                                                                                                       | C                                                                                                                  |
| frameshift deletion  | USP45 | chr6  | 99916420  | 99916420  | T                                                                                                                   | -_het      | T                                                                                                                       | T                                                                                                                       | T                                                                                                                  |
| frameshift deletion  | USP48 | chr1  | 22033386  | 22033387  | AA                                                                                                                  | AA         | -_hom                                                                                                                   | AA                                                                                                                      | AA                                                                                                                 |
| frameshift insertion | WASF3 | chr13 | 27255386  | 27255386  | -                                                                                                                   | -          | C_het                                                                                                                   | -                                                                                                                       | -                                                                                                                  |
| frameshift deletion  | WBP1  | chr2  | 74687410  | 74687410  | C                                                                                                                   | C          | -_het                                                                                                                   | C                                                                                                                       | C                                                                                                                  |
| frameshift deletion  | WDR55 | chr5  | 140049102 | 140049102 | A                                                                                                                   | A          | -_het                                                                                                                   | A                                                                                                                       | A                                                                                                                  |
| frameshift deletion  | WDR61 | chr15 | 78587761  | 78587770  | GTACAACATC                                                                                                          | GTACAACATC | GTACAACATC                                                                                                              | GTACAACATC                                                                                                              | -_het                                                                                                              |

|                      |         |       |           |           |    |       |       |       |        |
|----------------------|---------|-------|-----------|-----------|----|-------|-------|-------|--------|
| frameshift insertion | VENTXP7 | chr3  | 21447901  | 21447901  | -  | -     | C_hom | -     | -      |
| frameshift deletion  | VEPH1   | chr3  | 157081227 | 157081227 | T  | T     | -_het | T     | T      |
| frameshift deletion  | VIP     | chr6  | 153076471 | 153076471 | A  | A     | -_het | A     | A      |
| frameshift insertion | WNK1    | chr12 | 974308    | 974308    | -  | C_hom | C_het | C_het | -      |
| frameshift deletion  | WNK4    | chr17 | 40945875  | 40945876  | TT | TT    | -_het | TT    | TT     |
| frameshift deletion  | WNT16   | chr7  | 120971879 | 120971879 | G  | G     | -_het | G     | G      |
| frameshift deletion  | VWA3B   | chr2  | 98907090  | 98907090  | T  | T     | -_het | T     | T      |
| frameshift deletion  | VWA3B   | chr2  | 98928507  | 98928507  | G  | G     | -_het | G     | G      |
| frameshift deletion  | VWDE    | chr7  | 12443288  | 12443288  | C  | C     | -_het | C     | C      |
| frameshift insertion | X97876  | chr9  | 66499823  | 66499823  | -  | -     | -     | -     | TC_het |
| frameshift deletion  | XKR6    | chr8  | 11058234  | 11058234  | G  | G     | -_het | G     | G      |
| frameshift deletion  | XRN1    | chr3  | 142142409 | 142142409 | T  | T     | -_het | T     | T      |
| frameshift insertion | YBEY    | chr21 | 47711279  | 47711279  | -  | T_het | -     | -     | -      |
| frameshift deletion  | ZBTB20  | chr3  | 114058003 | 114058003 | G  | G     | -_het | G     | G      |
| frameshift insertion | ZFP36L2 | chr2  | 43452622  | 43452622  | -  | -     | C_het | -     | -      |
| frameshift deletion  | ZFYVE16 | chr5  | 79734010  | 79734010  | T  | T     | -_het | T     | T      |
| frameshift           | ZGLP1   | chr19 | 10416578  | 10416578  | C  | C     | -_het | C     | C      |

|                      |         |       |           |           |    |    |       |        |        |
|----------------------|---------|-------|-----------|-----------|----|----|-------|--------|--------|
| deletion             |         |       |           |           |    |    |       |        |        |
| frameshift deletion  | ZKSCAN4 | chr6  | 28217592  | 28217592  | C  | C  | -_het | C      | C      |
| frameshift deletion  | ZMYND8  | chr20 | 45867410  | 45867410  | A  | A  | -_het | A      | A      |
| frameshift deletion  | ZNF106  | chr15 | 42742957  | 42742957  | A  | A  | -_het | A      | A      |
| frameshift insertion | ZNF141  | chr4  | 338197    | 338197    | -  | -  | -     | GA_het | GA_het |
| frameshift deletion  | ZNF141  | chr4  | 338202    | 338203    | TC | TC | TC    | -_het  | -_het  |
| frameshift insertion | ZNF142  | chr2  | 219508768 | 219508768 | -  | -  | C_het | -      | -      |
| frameshift deletion  | ZNF169  | chr9  | 97062423  | 97062423  | G  | G  | -_het | G      | G      |
| frameshift insertion | ZNF175  | chr19 | 52084690  | 52084690  | -  | -  | -     | -      | G_het  |
| frameshift deletion  | ZNF257  | chr19 | 22255637  | 22255638  | TG | TG | TG    | -_het  | TG     |
| frameshift insertion | ZNF335  | chr20 | 44596241  | 44596241  | -  | -  | T_het | -      | -      |
| frameshift deletion  | ZNF33B  | chr10 | 43088712  | 43088712  | A  | A  | -_het | A      | A      |
| frameshift deletion  | ZNF343  | chr20 | 2473385   | 2473385   | T  | T  | T     | T      | -_het  |
| frameshift deletion  | ZNF385C | chr17 | 40180106  | 40180107  | AG | AG | -_het | AG     | AG     |
| frameshift deletion  | ZNF407  | chr18 | 72775787  | 72775787  | C  | C  | -_het | C      | C      |
| frameshift deletion  | ZNF429  | chr19 | 21720435  | 21720435  | A  | A  | -_het | A      | A      |
| frameshift deletion  | ZNF443  | chr19 | 12542364  | 12542364  | A  | A  | -_het | A      | A      |

|                      |        |       |           |           |                                                                                                                                                                                                                             |                                                                                                                                                                                                                                |        |                                                                                                                                                                                                                                |                                                                                                                                                                                                                             |
|----------------------|--------|-------|-----------|-----------|-----------------------------------------------------------------------------------------------------------------------------------------------------------------------------------------------------------------------------|--------------------------------------------------------------------------------------------------------------------------------------------------------------------------------------------------------------------------------|--------|--------------------------------------------------------------------------------------------------------------------------------------------------------------------------------------------------------------------------------|-----------------------------------------------------------------------------------------------------------------------------------------------------------------------------------------------------------------------------|
| frameshift insertion | ZNF486 | chr19 | 20308051  | 20308051  | -                                                                                                                                                                                                                           | -                                                                                                                                                                                                                              | AA_het | -                                                                                                                                                                                                                              | -                                                                                                                                                                                                                           |
| frameshift deletion  | ZNF491 | chr19 | 11917954  | 11917955  | AT                                                                                                                                                                                                                          | AT                                                                                                                                                                                                                             | -_het  | AT                                                                                                                                                                                                                             | AT                                                                                                                                                                                                                          |
| frameshift deletion  | ZNF514 | chr2  | 95815035  | 95815035  | T                                                                                                                                                                                                                           | T                                                                                                                                                                                                                              | -_het  | T                                                                                                                                                                                                                              | T                                                                                                                                                                                                                           |
| frameshift deletion  | ZNF571 | chr19 | 38046867  | 38046870  | GTAA                                                                                                                                                                                                                        | GTAA                                                                                                                                                                                                                           | GTAA   | GTAA                                                                                                                                                                                                                           | -_het                                                                                                                                                                                                                       |
| frameshift insertion | ZNF595 | chr4  | 87313     | 87313     | -                                                                                                                                                                                                                           | A_hom                                                                                                                                                                                                                          | A_hom  | A_hom                                                                                                                                                                                                                          | A_hom                                                                                                                                                                                                                       |
| frameshift deletion  | ZNF608 | chr5  | 123984684 | 123984684 | C                                                                                                                                                                                                                           | C                                                                                                                                                                                                                              | -_het  | C                                                                                                                                                                                                                              | C                                                                                                                                                                                                                           |
| frameshift deletion  | ZNF626 | chr19 | 20807134  | 20807300  | GCTTTGCCACATT<br>CTTCACATTTGTA<br>GAATTTCTCTCCA<br>GTATGATTCTCTC<br>ATGTGTAGTAAG<br>GATTGAGGACTG<br>GTTGAAGGCTTT<br>GCCACATTCTTCA<br>CATTTGTAGGGT<br>CTCTCTCCAGTAT<br>GAATTTTCTTATG<br>TGTAGTAAGGTT<br>AGAGGAGCACTT<br>AAAA | GCTTTGCCACA<br>TTCTTCACATTT<br>GTAGAATTTCT<br>CTCCAGTATGA<br>TTCTCTCATGTG<br>TAGTAAGGATT<br>GAGGACTGGTT<br>GAAGGCTTTGC<br>CACATTCTTCA<br>ATTTGTAGGGT<br>CTCTCTCCAGTA<br>TGAATTTTCTTA<br>TGTGTAGTAAG<br>GTTAGAGGAGC<br>ACTTAAAA | -_het  | GCTTTGCCACA<br>TTCTTCACATTT<br>GTAGAATTTCT<br>CTCCAGTATGA<br>TTCTCTCATGTG<br>TAGTAAGGATT<br>GAGGACTGGTT<br>GAAGGCTTTGC<br>CACATTCTTCA<br>ATTTGTAGGGT<br>CTCTCTCCAGTA<br>TGAATTTTCTTA<br>TGTGTAGTAAG<br>GTTAGAGGAGC<br>ACTTAAAA | GCTTTGCCACATT<br>CTTCACATTTGTA<br>GAATTTCTCTCCA<br>GTATGATTCTCTC<br>ATGTGTAGTAAG<br>GATTGAGGACTG<br>GTTGAAGGCTTT<br>GCCACATTCTTCA<br>CATTTGTAGGGT<br>CTCTCTCCAGTATG<br>AATTTTCTTATGT<br>GTAGTAAGGTTA<br>GAGGAGCACTTA<br>AAA |
| frameshift deletion  | ZNF660 | chr3  | 44636279  | 44636280  | AT                                                                                                                                                                                                                          | -_hom                                                                                                                                                                                                                          | AT     | AT                                                                                                                                                                                                                             | AT                                                                                                                                                                                                                          |
| frameshift deletion  | ZNF717 | chr3  | 75786761  | 75786761  | C                                                                                                                                                                                                                           | -_het                                                                                                                                                                                                                          | -_hom  | -_het                                                                                                                                                                                                                          | -_het                                                                                                                                                                                                                       |
| frameshift           | ZNF717 | chr3  | 75786895  | 75786895  | T                                                                                                                                                                                                                           | -_het                                                                                                                                                                                                                          | -_hom  | -_het                                                                                                                                                                                                                          | -_het                                                                                                                                                                                                                       |



|                      |        |       |           |           |                                                                                                             |                                                                                                                                                                                    |                                                                                                                                                                                    |                                                                                                                                                                                    |                                                                                                                                                                               |
|----------------------|--------|-------|-----------|-----------|-------------------------------------------------------------------------------------------------------------|------------------------------------------------------------------------------------------------------------------------------------------------------------------------------------|------------------------------------------------------------------------------------------------------------------------------------------------------------------------------------|------------------------------------------------------------------------------------------------------------------------------------------------------------------------------------|-------------------------------------------------------------------------------------------------------------------------------------------------------------------------------|
| deletion             |        |       |           |           |                                                                                                             |                                                                                                                                                                                    |                                                                                                                                                                                    |                                                                                                                                                                                    |                                                                                                                                                                               |
|                      |        |       |           |           |                                                                                                             | GTCTCCAGCAT<br>CATGTCCCTGT<br>ACAGGTTTCTT<br>CTGAGCATCAT<br>CCAGGTCCTGC<br>TACTCCTCCCAG<br>GTGAAGTGCAT<br>AGCTACCTCCTC<br>AAAGGATGCCA<br>ACTCCTGTAAT<br>GATAGCAGGCT<br>GTTATAA_het | GTCTCCAGCAT<br>CATGTCCCTGT<br>ACAGGTTTCTT<br>CTGAGCATCAT<br>CCAGGTCCTGC<br>TACTCCTCCCAG<br>GTGAAGTGCAT<br>AGCTACCTCCTC<br>AAAGGATGCCA<br>ACTCCTGTAAT<br>GATAGCAGGCT<br>GTTATAA_hom | GTCTCCAGCAT<br>CATGTCCCTGT<br>ACAGGTTTCTT<br>CTGAGCATCAT<br>CCAGGTCCTGC<br>TACTCCTCCCAG<br>GTGAAGTGCAT<br>AGCTACCTCCTC<br>AAAGGATGCCA<br>ACTCCTGTAAT<br>GATAGCAGGCT<br>GTTATAA_het | GTCTCCAGCATCA<br>TGTCCTGTACAG<br>GTTTCTTCTGAGC<br>ATCATCCAGGTCC<br>TGCTACTCCTCCC<br>AGGTGAAGTGCA<br>TAGCTACCTCCTC<br>AAAGGATGCCAA<br>CTCCTGTAATGAT<br>AGCAGGCTGTTAT<br>AA_het |
| stopgain             | ZNF717 | chr3  | 75790783  | 75790783  | -                                                                                                           |                                                                                                                                                                                    |                                                                                                                                                                                    |                                                                                                                                                                                    |                                                                                                                                                                               |
| frameshift deletion  | ZNF77  | chr19 | 2939268   | 2939289   | ACCACCCTTACCC<br>AAGGAGGCA                                                                                  | ACCACCCTTACC<br>CAAGGAGGCA                                                                                                                                                         | ACCACCCTTACC<br>CAAGGAGGCA                                                                                                                                                         | ACCACCCTTACC<br>CAAGGAGGCA                                                                                                                                                         | -_het                                                                                                                                                                         |
| frameshift insertion | ZNF799 | chr19 | 12501371  | 12501371  | -                                                                                                           | -                                                                                                                                                                                  | T_het                                                                                                                                                                              | -                                                                                                                                                                                  | -                                                                                                                                                                             |
| frameshift deletion  | ZNF800 | chr7  | 127014068 | 127014068 | T                                                                                                           | T                                                                                                                                                                                  | -_het                                                                                                                                                                              | T                                                                                                                                                                                  | T                                                                                                                                                                             |
| frameshift insertion | ZNF814 | chr19 | 58385707  | 58385707  | -                                                                                                           | -                                                                                                                                                                                  | T_het                                                                                                                                                                              | -                                                                                                                                                                                  | -                                                                                                                                                                             |
| frameshift deletion  | ZNF83  | chr19 | 53116934  | 53117017  | CCCACTCATTAC<br>ATTTGTAAGGTTT<br>CTCTCCAGTGTG<br>GATTCTCTGATGT<br>TGTGCAAGGTGT<br>GAAATATGATGG<br>AAGACCTTT | CCCACTCATTAC<br>CATTTGTAAGG<br>TTTCTCTCCAGT<br>GTGGATTCTCT<br>GATGTTGTGCA<br>AGGTGTGAAAT<br>ATGATGGAAGA<br>CCTTT                                                                   | CCCACTCATTAC<br>CATTTGTAAGG<br>TTTCTCTCCAGT<br>GTGGATTCTCT<br>GATGTTGTGCA<br>AGGTGTGAAAT<br>ATGATGGAAGA<br>CCTTT                                                                   | CCCACTCATTAC<br>ATTTGTAAGGTTT<br>CTCTCCAGTGTGG<br>ATTCTCTGATGTT<br>GTGCAAGGTGTG<br>AAATATGATGGA<br>AGACCTTT                                                                        |                                                                                                                                                                               |
| frameshift deletion  | ZNF880 | chr19 | 52887146  | 52887146  | A                                                                                                           | -_het                                                                                                                                                                              | -_het                                                                                                                                                                              | A                                                                                                                                                                                  | -_het                                                                                                                                                                         |

|                      |         |       |          |          |    |       |        |        |                           |
|----------------------|---------|-------|----------|----------|----|-------|--------|--------|---------------------------|
| frameshift deletion  | ZNF880  | chr19 | 52887375 | 52887375 | A  | A     | -_het  | A      | A                         |
| frameshift insertion | ZNF880  | chr19 | 52888070 | 52888070 | -  | -     | -      | -      | TTGGGAGGCCGA<br>GGCGG_het |
| frameshift insertion | ZNF880  | chr19 | 52888074 | 52888074 | -  | -     | -      | -      | AT_het                    |
| frameshift deletion  | ZNF890P | chr7  | 5172096  | 5172097  | TT | -_het | -_het  | -_het  | TT                        |
| frameshift insertion | ZNF890P | chr7  | 5172099  | 5172099  | -  | -     | TG_het | TG_het | -                         |
| frameshift insertion | ZSWIM5  | chr1  | 45672021 | 45672021 | -  | -     | T_het  | -      | -                         |
