# Supplementary material for: The neuroendocrine phenotype, genomic profile and therapeutic sensitivity of GEPNET cell lines
Source: PubMed Central journal article supplement (PMC5827037; doi:10.1530/erc-17-0445), 2018-01-15
Supplement: erc-25-309-t005.pdf [file erc-25-309-t005.pdf]

Supplementary Table 5. Inhibitor screening of GEPNET cell lines.

| Product Name                                                 | CAS Number   | Form          | Targets                   | GOT1         |         | BON-1        |         | QGP-1        |         | P-ST5        |         |
|--------------------------------------------------------------|--------------|---------------|---------------------------|--------------|---------|--------------|---------|--------------|---------|--------------|---------|
|                                                              |              |               |                           | % of control | Z-score | % of control | Z-score | % of control | Z-score | % of control | Z-score |
| <b>(-)-Blebbistatin</b>                                      | 856925-71-8  | free base     | ATPase                    | 77.9         | -0.36   | 77.6         | -0.31   |              |         | 95.6         | 0.09    |
| <b>(-)-MK 801 Maleate</b>                                    | 121917-57-5  | maleate       | GluR                      | 93.9         | 0.32    | 114.8        | 1.05    | 97.5         | -0.04   | 77.1         | -0.50   |
| <b>(-)-Parthenolide</b>                                      | 20554-84-1   | free base     | E3 Ligase                 | 107.6        | 0.90    | 77.7         | -0.30   | 85.6         | -0.54   | 135.5        | 1.35    |
| <b>(-)-p-Bromotetramisole Oxalate</b>                        | 62284-79-1   | free base     | Others                    | 85.7         | -0.03   | 97.3         | 0.41    | 110.1        | 0.49    | 113.0        | 0.64    |
| <b>(+)-Bicuculline</b>                                       | 485-49-4     | free base     | GABA Receptor             | 85.1         | -0.05   | 99.2         | 0.48    | 76.5         | -0.93   | 120.0        | 0.86    |
| <b>(+)-JQ1</b>                                               | 1268524-70-4 | free base     | Epigenetic Reader Domain  | 13.8         | -3.08   | 35.4         | -1.84   |              |         | 3.8          | -2.82   |
| <b>(+)-Matrine</b>                                           | 519-02-8     | free base     | Opioid Receptor           | 121.8        | 1.50    | 102.0        | 0.58    | 83.6         | -0.63   | 124.5        | 1.00    |
| <b>(R)-Nepicastat HCl</b>                                    | 195881-94-8  | Salt          | Hydroxylase               | 87.9         | 0.06    | 65.7         | -0.74   | 81.7         | -0.71   | 127.5        | 1.10    |
| <b>(S)-crizotinib</b>                                        | 1374356-45-2 | free base     | MTH                       | 107.2        | 0.88    | 79.4         | -0.24   | 105.1        | 0.28    | 97.0         | 0.13    |
| <b>10058-F4</b>                                              | 403811-55-2  | free base     | c-Myc                     | 82.3         | -0.18   | 97.2         | 0.41    |              |         | 99.2         | 0.20    |
| <b>17-AAG (Tanespimycin)</b>                                 | 75747-14-7   | free base     | HSP (e.g. HSP90)          | 67.9         | -0.78   | 26.5         | -2.16   | 59.2         | -1.67   | 53.4         | -1.25   |
| <b>17-DMAG (Alvespimycin) HCl</b>                            | 467214-21-7  | hydrochloride | HSP (e.g. HSP90)          | 39.4         | -1.99   | 26.4         | -2.17   | 41.7         | -2.41   | 21.9         | -2.25   |
| <b>1-Azakenpauillone</b>                                     | 676596-65-9  | free base     | GSK-3                     | 64.5         | -0.93   | 55.0         | -1.13   |              |         | 113.8        | 0.66    |
| <b>2-Methoxyestradiol (2-MeOE2)</b>                          | 362-07-2     | free base     | HIF                       | 93.0         | 0.28    | 81.3         | -0.17   | 116.6        | 0.77    | 94.9         | 0.07    |
| <b>3-Aminobenzamide</b>                                      | 3544-24-9    | free base     | PARP                      | 72.5         | -0.59   | 74.6         | -0.42   | 85.1         | -0.57   | 116.1        | 0.74    |
| <b>3-Deazaneplanocin A (DZNeP)</b>                           | 102052-95-9  | free base     | Histone Methyltransferase | 75.4         | -0.47   | 64.8         | -0.77   |              |         | 105.3        | 0.40    |
| <b>3-Methyladenine</b>                                       | 5142-23-4    | free base     | Autophagy,PI3K            | 114.2        | 1.18    | 64.4         | -0.79   | 105.3        | 0.29    | 109.4        | 0.52    |
| <b>4E1RCat</b>                                               | 328998-25-0  | free base     | ELF4                      | 134.8        | 2.05    | 109.3        | 0.85    | 111.9        | 0.57    | 87.9         | -0.15   |
| <b>4EGI-1</b>                                                | 315706-13-9  | free base     | ELF4                      | 80.9         | -0.23   | 116.5        | 1.11    | 101.3        | 0.12    | 128.6        | 1.13    |
| <b>5-hydroxymethyl Tolterodine (PNU 200577, 5-HMT, 5-HM)</b> | 207679-81-0  | free base     | AChR                      | 120.1        | 1.43    | 79.3         | -0.24   | 111.2        | 0.54    | 87.2         | -0.18   |
| <b>6H05</b>                                                  | No           | free base     | Rho                       | 90.1         | 0.16    | 116.8        | 1.12    | 108.4        | 0.42    | 132.9        | 1.27    |
| <b>A66</b>                                                   | 1166227-08-2 | free base     | PI3K                      | 60.3         | -1.11   | 114.1        | 1.02    | 78.7         | -0.84   | 115.3        | 0.71    |
| <b>A-674563</b>                                              | 552325-73-2  | free base     | PKA,CDK,Akt               | 51.0         | -1.50   | 114.8        | 1.05    | 94.7         | -0.16   | 59.7         | -1.05   |
| <b>A-769662</b>                                              | 844499-71-4  | free base     | AMPK                      | 103.3        | 0.71    | 101.6        | 0.57    | 118.9        | 0.87    | 121.1        | 0.90    |

|                                     |              |               |                       |       |       |       |       |       |       |       |       |
|-------------------------------------|--------------|---------------|-----------------------|-------|-------|-------|-------|-------|-------|-------|-------|
| <b>A-803467</b>                     | 944261-79-4  | free base     | Sodium Channel        | 119.4 | 1.40  | 105.0 | 0.69  | 89.5  | -0.38 | 108.2 | 0.49  |
| <b>A922500</b>                      | 959122-11-3  | free base     | Transferase           | 85.0  | -0.06 | 66.4  | -0.71 | 62.4  | -1.53 | 110.6 | 0.56  |
| <b>ABT-199 (GDC-0199)</b>           | 1257044-40-8 | free base     | Bcl-2                 | 68.4  | -0.76 | 63.8  | -0.81 | 102.9 | 0.19  | 41.2  | -1.63 |
| <b>ABT-263 (Navitoclax)</b>         | 923564-51-6  | free base     | Bcl-2                 | 123.3 | 1.56  | 114.4 | 1.03  | 86.1  | -0.52 | 4.2   | -2.81 |
| <b>ABT-737</b>                      | 852808-04-9  | free base     | Autophagy,Bcl-2       | 128.9 | 1.80  | 114.2 | 1.03  | 97.6  | -0.04 | 3.8   | -2.82 |
| <b>AC480 (BMS-599626)</b>           | 714971-09-2  | free base     | HER2,EGFR             | 93.7  | 0.31  | 105.0 | 0.69  | 113.8 | 0.65  | 106.6 | 0.44  |
| <b>Acadesine</b>                    | 2627-69-2    | free base     | AMPK                  | 101.8 | 0.65  | 113.6 | 1.01  | 102.0 | 0.15  | 93.1  | 0.01  |
| <b>Acebutolol HCl</b>               | 34381-68-5   | hydrochloride | Adrenergic Receptor   | 94.2  | 0.33  | 115.3 | 1.06  | 111.8 | 0.57  | 135.6 | 1.35  |
| <b>Acemetacin</b>                   | 53164-05-9   | free base     | COX                   | 85.6  | -0.03 | 49.6  | -1.32 | 122.5 | 1.02  | 107.6 | 0.47  |
| <b>Acetylcholine Chloride</b>       | 60-31-1      | chloride      | AChR                  | 108.1 | 0.92  | 105.1 | 0.69  | 108.3 | 0.42  | 92.0  | -0.03 |
| <b>Acetylcysteine</b>               | 616-91-1     | free base     | AChR                  | 83.6  | -0.12 | 65.4  | -0.75 | 89.1  | -0.40 | 98.0  | 0.16  |
| <b>Aclidinium Bromide</b>           | 320345-99-1  | free base     | AChR                  | 96.8  | 0.44  | 112.5 | 0.96  | 100.9 | 0.10  | 128.7 | 1.14  |
| <b>Adefovir Dipivoxil</b>           | 142340-99-6  | free base     | Reverse Transcriptase | 115.8 | 1.25  | 99.8  | 0.50  | 98.8  | 0.02  | 28.4  | -2.04 |
| <b>ADL5859 HCl</b>                  | 850173-95-4  | hydrochloride | Opioid Receptor       | 84.1  | -0.10 | 116.4 | 1.11  | 110.1 | 0.49  | 64.2  | -0.91 |
| <b>Adrenalone HCl</b>               | 62-13-5      | hydrochloride | Adrenergic Receptor   | 94.9  | 0.36  | 118.5 | 1.18  | 109.3 | 0.46  | 129.8 | 1.17  |
| <b>ADX-47273</b>                    | 851881-60-2  | free base     | GluR                  | 82.6  | -0.16 | 51.3  | -1.26 | 120.8 | 0.95  | 130.7 | 1.20  |
| <b>AEBSF HCl</b>                    | 30827-99-7   | Salt          | Serine Protease       | 92.6  | 0.26  | 57.3  | -1.04 | 102.4 | 0.17  | 112.3 | 0.62  |
| <b>AEE788 (NVP-AEE788)</b>          | 497839-62-0  | free base     | HER2,VEGFR,EGFR       | 100.1 | 0.58  | 115.8 | 1.08  | 119.9 | 0.91  | 96.3  | 0.11  |
| <b>Afatinib (BIBW2992)</b>          | 439081-18-2  | free base     | EGFR,HER2             | 100.7 | 0.61  | 105.4 | 0.71  | 96.0  | -0.11 | 90.9  | -0.06 |
| <b>AG-1024</b>                      | 65678-07-1   | free base     | IGF-1R                | 100.0 | 0.58  | 102.3 | 0.59  | 85.5  | -0.55 | 93.0  | 0.01  |
| <b>AG-14361</b>                     | 328543-09-5  | free base     | PARP                  | 106.4 | 0.85  | 55.0  | -1.13 | 96.1  | -0.10 | 77.9  | -0.47 |
| <b>AG-1478 (Tyrphostin AG-1478)</b> | 153436-53-4  | free base     | EGFR                  | 99.2  | 0.54  | 105.6 | 0.71  | 119.4 | 0.89  | 123.9 | 0.99  |
| <b>AG-18</b>                        | 118409-57-7  | free base     | EGFR                  | 85.7  | -0.03 | 66.5  | -0.71 | 106.2 | 0.33  | 86.8  | -0.19 |
| <b>AG-490 (Tyrphostin B42)</b>      | 133550-30-8  | free base     | JAK,EGFR              | 102.6 | 0.69  | 117.0 | 1.13  | 117.2 | 0.80  | 93.4  | 0.02  |
| <b>AGI-5198</b>                     | 1355326-35-0 | free base     | Dehydrogenase         | 86.7  | 0.01  | 77.8  | -0.30 |       |       | 114.5 | 0.69  |
| <b>AGI-6780</b>                     | 1432660-47-3 | free base     | IDH2                  | 70.6  | -0.67 | 107.4 | 0.78  |       |       | 102.6 | 0.31  |
| <b>Agomelatine</b>                  | 138112-76-2  | free base     | 5-HT Receptor         | 113.7 | 1.16  | 112.9 | 0.98  | 111.5 | 0.55  | 67.1  | -0.81 |
| <b>Alfuzosin HCl</b>                | 81403-68-1   | hydrochloride | Adrenergic Receptor   | 90.0  | 0.15  | 56.3  | -1.08 | 108.9 | 0.44  | 91.8  | -0.03 |
| <b>Alisertib (MLN8237)</b>          | 1028486-01-2 | free base     | Aurora Kinase         | 91.9  | 0.23  | 73.8  | -0.44 | 71.1  | -1.16 | 60.7  | -1.02 |

|                               |             |                 |                               |       |       |       |       |       |       |       |       |
|-------------------------------|-------------|-----------------|-------------------------------|-------|-------|-------|-------|-------|-------|-------|-------|
| <b>Aliskiren Hemifumarate</b> | 173334-58-2 | fumarate        | RAAS                          | 87.6  | 0.05  | 66.7  | -0.70 | 91.6  | -0.29 | 124.8 | 1.01  |
| <b>Alizarin</b>               | 72-48-0     | free base       | P450 (e.g. CYP17)             | 94.8  | 0.36  | 51.8  | -1.25 | 118.4 | 0.85  | 123.8 | 0.98  |
| <b>Allopurinol</b>            | 315-30-0    | free base       | OX Receptor                   | 107.6 | 0.90  | 114.9 | 1.05  | 110.5 | 0.51  | 94.8  | 0.06  |
| <b>Almorexant HCl</b>         | 913358-93-7 | HCl             | OX Receptor                   | 114.8 | 1.20  | 67.7  | -0.67 | 106.7 | 0.35  | 100.2 | 0.23  |
| <b>Almotriptan Malate</b>     | 181183-52-8 | malate          | 5-HT Receptor                 | 134.3 | 2.03  | 114.4 | 1.03  | 97.0  | -0.06 | 92.4  | -0.01 |
| <b>Alogliptin</b>             | 850649-61-5 | free base       | DPP-4                         | 83.7  | -0.12 | 68.0  | -0.65 | 128.1 | 1.26  | 103.6 | 0.34  |
| <b>Aloxistatin</b>            | 88321-09-9  | free base       | Cysteine protease             | 72.4  | -0.59 | 117.1 | 1.13  | 99.5  | 0.04  | 69.1  | -0.75 |
| <b>Altrenogest</b>            | 850-52-2    | free base       | Estrogen/progestogen Receptor | 93.6  | 0.30  | 114.7 | 1.04  | 115.4 | 0.72  | 125.6 | 1.04  |
| <b>Alvelestat (AZD9668)</b>   | 848141-11-7 | free base       | Serine Protease               | 77.8  | -0.36 | 79.4  | -0.24 |       |       | 133.0 | 1.27  |
| <b>AM1241</b>                 | 444912-48-5 | free base       | Cannabinoid Receptor          | 101.5 | 0.64  | 114.8 | 1.05  | 110.4 | 0.51  | 84.0  | -0.28 |
| <b>AM251</b>                  | 183232-66-8 | free base       | Cannabinoid Receptor          | 89.7  | 0.14  | 92.4  | 0.23  | 108.3 | 0.42  | 116.8 | 0.76  |
| <b>Amantadine HCl</b>         | 665-66-7    | hydrochloride   | Dopamine Receptor             | 111.7 | 1.07  | 108.8 | 0.83  | 98.7  | 0.01  | 115.9 | 0.73  |
| <b>Ambroxol HCl</b>           | 23828-92-4  | hydrochloride   | Sodium Channel                | 89.6  | 0.14  | 93.1  | 0.26  | 87.3  | -0.47 | 117.7 | 0.79  |
| <b>Amfebutamone HCl</b>       | 31677-93-7  | hydrochloride   | Dopamine Receptor, AChR       | 105.8 | 0.82  | 109.7 | 0.86  | 138.5 | 1.70  | 111.9 | 0.60  |
| <b>AMG-458</b>                | 913376-83-7 | free base       | c-Met                         | 74.7  | -0.49 | 77.0  | -0.33 | 86.1  | -0.52 | 111.7 | 0.60  |
| <b>AMG-517</b>                | 659730-32-2 | free base       | TRPV                          | 80.7  | -0.24 | 93.4  | 0.27  |       |       | 120.2 | 0.87  |
| <b>AMG-900</b>                | 945595-80-2 | free base       | Aurora Kinase                 | 74.8  | -0.49 | 51.5  | -1.25 | 68.3  | -1.28 | 90.4  | -0.08 |
| <b>Aminoglutethimide</b>      | 125-84-8    | free base       | Aromatase                     | 129.1 | 1.81  | 99.9  | 0.50  | 104.4 | 0.25  | 72.7  | -0.64 |
| <b>Aminophylline</b>          | 317-34-0    | ethylenediamine | PDE                           | 84.7  | -0.07 | 112.8 | 0.97  | 100.6 | 0.09  | 93.6  | 0.03  |
| <b>Amiodarone HCl</b>         | 19774-82-4  | hydrochloride   | Autophagy, Potassium Channel  | 89.3  | 0.12  | 114.9 | 1.05  | 101.5 | 0.13  | 80.2  | -0.40 |
| <b>Amisulpride</b>            | 71675-85-9  | free base       | Dopamine Receptor             | 70.3  | -0.68 | 82.2  | -0.14 | 137.7 | 1.67  | 94.3  | 0.05  |
| <b>Amitriptyline HCl</b>      | 549-18-8    | hydrochloride   | 5-HT Receptor                 | 90.9  | 0.19  | 118.0 | 1.16  | 106.2 | 0.33  | 138.2 | 1.44  |
| <b>Amlodipine</b>             | 88150-42-9  | free base       | Calcium Channel               | 91.6  | 0.22  | 116.6 | 1.11  | 103.6 | 0.22  | 156.6 | 2.02  |
| <b>Amonafide</b>              | 69408-81-7  | free base       | Topoisomerase                 | 69.9  | -0.70 | 113.6 | 1.00  | 78.4  | -0.85 | 81.4  | -0.36 |
| <b>Ampiroxicam</b>            | 99464-64-9  | free base       | COX                           | 99.2  | 0.54  | 118.0 | 1.16  | 112.5 | 0.60  | 128.5 | 1.13  |
| <b>Amprenavir</b>             | 161814-49-9 | free base       | HIV Protease                  | 88.1  | 0.07  | 113.3 | 0.99  | 109.6 | 0.47  | 91.3  | -0.05 |
| <b>Amuvatinib (MP-470)</b>    | 850879-09-3 | free base       | FLT3,c-RET,PDGFR,c-Kit        | 97.7  | 0.48  | 81.8  | -0.15 | 122.3 | 1.01  | 58.0  | -1.10 |
| <b>Anacetrapib (MK-0859)</b>  | 875446-37-0 | free base       | CETP                          | 81.4  | -0.21 | 63.4  | -0.82 | 116.9 | 0.78  | 125.3 | 1.03  |

|                                 |              |               |                                              |       |       |       |       |       |       |       |       |
|---------------------------------|--------------|---------------|----------------------------------------------|-------|-------|-------|-------|-------|-------|-------|-------|
| <b>Anagrelide HCl</b>           | 58579-51-4   | hydrochloride | PDE                                          | 92.1  | 0.24  | 118.6 | 1.18  | 111.3 | 0.54  | 122.0 | 0.92  |
| <b>Anastrozole</b>              | 120511-73-1  | free base     | Aromatase                                    | 83.7  | -0.11 | 112.4 | 0.96  | 113.0 | 0.62  | 77.6  | -0.48 |
| <b>Andarine</b>                 | 401900-40-1  | free base     | Androgen Receptor                            | 101.7 | 0.65  | 117.3 | 1.14  | 115.2 | 0.71  | 57.1  | -1.13 |
| <b>Anidulafungin (LY303366)</b> | 166663-25-8  | free base     | Others                                       | 100.7 | 0.61  | 104.5 | 0.67  | 86.9  | -0.49 | 92.8  | 0.00  |
| <b>Aniracetam</b>               | 72432-10-1   | free base     | AMPA Receptor-kainate Receptor-NMDA Receptor | 96.8  | 0.44  | 73.1  | -0.47 | 119.5 | 0.89  | 94.1  | 0.04  |
| <b>AP26113</b>                  | 1197958-12-5 | free base     | ALK                                          | 54.9  | -1.33 | 60.9  | -0.91 | 64.6  | -1.44 | 108.9 | 0.51  |
| <b>Apatinib</b>                 | 811803-05-1  | sulfate       | VEGFR                                        | 113.1 | 1.13  | 113.6 | 1.00  | 100.1 | 0.07  | 92.9  | 0.00  |
| <b>Apigenin</b>                 | 520-36-5     | free base     | P450 (e.g. CYP17)                            | 108.5 | 0.93  | 107.3 | 0.77  | 82.6  | -0.67 | 119.0 | 0.83  |
| <b>Apixaban</b>                 | 503612-47-3  | free base     | Factor Xa                                    | 89.2  | 0.12  | 114.8 | 1.05  | 90.2  | -0.35 | 90.7  | -0.07 |
| <b>Apoptosis Activator 2</b>    | 79183-19-0   | free base     | Caspase                                      | 78.8  | -0.32 | 64.9  | -0.77 | 129.1 | 1.30  | 104.6 | 0.37  |
| <b>Apremilast (CC-10004)</b>    | 608141-41-9  | free base     | PDE                                          | 89.2  | 0.12  | 64.5  | -0.78 | 112.1 | 0.58  | 96.1  | 0.10  |
| <b>Aprepitant</b>               | 170729-80-3  | free base     | Substance P                                  | 90.6  | 0.18  | 104.5 | 0.67  | 117.4 | 0.80  | 71.9  | -0.66 |
| <b>AR-42</b>                    | 935881-37-1  | free base     | HDAC                                         | 26.9  | -2.52 | 39.1  | -1.70 | 46.4  | -2.21 | 0.2   | -2.93 |
| <b>AR-A014418</b>               | 487021-52-3  | free base     | GSK-3                                        | 78.5  | -0.33 | 116.7 | 1.12  | 129.3 | 1.31  | 73.5  | -0.61 |
| <b>Arecoline</b>                | 300-08-3     | HBr           | AChR                                         | 85.8  | -0.03 | 56.3  | -1.08 | 104.0 | 0.24  | 125.4 | 1.03  |
| <b>Aripiprazole</b>             | 129722-12-9  | free base     | 5-HT Receptor                                | 95.9  | 0.40  | 106.4 | 0.74  | 100.5 | 0.08  | 155.0 | 1.97  |
| <b>ARN-509</b>                  | 956104-40-8  | free base     | Androgen Receptor                            | 88.3  | 0.08  | 77.1  | -0.32 | 111.6 | 0.56  | 108.5 | 0.50  |
| <b>ARQ 621</b>                  | 1095253-39-6 | free base     | Kinesin                                      | 64.4  | -0.93 | 77.2  | -0.32 | 45.6  | -2.24 | 58.6  | -1.08 |
| <b>AS-252424</b>                | 900515-16-4  | free base     | PI3K                                         | 67.5  | -0.80 | 115.8 | 1.08  | 112.5 | 0.60  | 83.0  | -0.31 |
| <b>AS-604850</b>                | 648449-76-7  | free base     | PI3K                                         | 85.0  | -0.06 | 53.2  | -1.19 | 113.2 | 0.63  | 125.2 | 1.03  |
| <b>Asaraldehyde</b>             | 4460-86-0    | free base     | COX                                          | 103.9 | 0.74  | 70.0  | -0.58 | 118.5 | 0.85  | 117.0 | 0.77  |
| <b>Asenapine</b>                | 85650-56-2   | maleate       | 5-HT Receptor,Adrenergic Receptor            | 90.9  | 0.19  | 54.9  | -1.13 | 113.6 | 0.64  | 94.1  | 0.04  |
| <b>Asiatic Acid</b>             | 464-92-6     | free base     | p38 MAPK                                     | 108.7 | 0.94  | 69.8  | -0.59 | 89.5  | -0.38 | 114.3 | 0.68  |
| <b>Aspirin</b>                  | 50-78-2      | free base     | Proteasome                                   | 151.0 | 2.74  | 111.9 | 0.94  | 109.7 | 0.48  | 93.3  | 0.02  |
| <b>AST-1306</b>                 | 1050500-29-2 | mesylate      | EGFR                                         | 80.6  | -0.25 | 64.8  | -0.77 | 73.6  | -1.06 | 77.0  | -0.50 |
| <b>Astragaloside A</b>          | 83207-58-3   | free base     | TGF-beta/Smad                                | 104.7 | 0.77  | 102.9 | 0.61  | 82.9  | -0.66 | 114.7 | 0.69  |
| <b>Astragaloside A</b>          | 83207-58-3   | free base     | TGF-beta/Smad                                | 103.1 | 0.71  | 89.5  | 0.13  | 87.7  | -0.46 | 117.9 | 0.79  |
| <b>AT101</b>                    | 866541-93-7  | free base     | Bcl-2                                        | 75.5  | -0.46 | 113.6 | 1.00  | 118.6 | 0.85  | 112.1 | 0.61  |

|                                 |              |                    |                                 |       |       |       |       |       |       |       |       |
|---------------------------------|--------------|--------------------|---------------------------------|-------|-------|-------|-------|-------|-------|-------|-------|
| <b>AT13387</b>                  | 912999-49-6  | free base          | HSP (e.g. HSP90)                | 55.4  | -1.32 | 29.3  | -2.06 | 43.4  | -2.34 | 38.6  | -1.72 |
| <b>AT7519</b>                   | 844442-38-2  | free base          | CDK                             | 59.5  | -1.14 | 27.1  | -2.14 | 31.3  | -2.86 | 19.4  | -2.32 |
| <b>AT7867</b>                   | 857531-00-1  | free base          | S6 Kinase,Akt                   | 86.2  | -0.01 | 115.4 | 1.07  | 115.7 | 0.73  | 108.3 | 0.49  |
| <b>AT9283</b>                   | 896466-04-9  | free base          | JAK,Aurora Kinase,Bcr-Abl       | 77.0  | -0.40 | 109.8 | 0.87  | 60.3  | -1.62 | 88.1  | -0.15 |
| <b>Ataluren (PTC124)</b>        | 775304-57-9  | free base          | CFTR                            | 88.0  | 0.07  | 56.5  | -1.07 | 82.4  | -0.68 | 112.9 | 0.64  |
| <b>Atazanavir Sulfate</b>       | 229975-97-7  | sulfate            | HIV Protease                    | 76.4  | -0.43 | 94.9  | 0.32  | 98.3  | -0.01 | 93.1  | 0.01  |
| <b>Atglistatin</b>              | 1469924-27-3 | free base          | ATGL                            | 85.8  | -0.03 | 64.5  | -0.78 | 109.1 | 0.45  | 108.7 | 0.50  |
| <b>Atomoxetine HCl</b>          | 82248-59-7   | hydrochloride      | 5-HT Receptor                   | 85.3  | -0.05 | 62.0  | -0.87 | 117.2 | 0.79  | 140.4 | 1.51  |
| <b>Atorvastatin Calcium</b>     | 134523-03-8  | calcium            | HMG-CoA Reductase               | 92.2  | 0.24  | 107.5 | 0.78  | 95.1  | -0.14 | 111.2 | 0.58  |
| <b>Atropine</b>                 | 5908-99-6    | coordination<br>co | AChR                            | 112.5 | 1.10  | 94.8  | 0.32  | 86.6  | -0.51 | 105.7 | 0.41  |
| <b>Aurora A Inhibitor I</b>     | 1158838-45-9 | free base          | Aurora Kinase                   | 50.6  | -1.52 | 46.7  | -1.43 | 62.9  | -1.51 | 59.3  | -1.06 |
| <b>AUY922 (NVP-AUY922)</b>      | 747412-49-3  | free base          | HSP (e.g. HSP90)                | 40.6  | -1.94 | 36.3  | -1.81 | 34.5  | -2.72 | 47.8  | -1.43 |
| <b>Avagacestat (BMS-708163)</b> | 1146699-66-2 | free base          | Gamma-secretase,Beta<br>Amyloid | 130.5 | 1.87  | 91.9  | 0.21  | 110.4 | 0.51  | 93.9  | 0.03  |
| <b>Avanafil</b>                 | 330784-47-9  | free base          | PDE                             | 90.2  | 0.16  | 53.5  | -1.18 | 104.3 | 0.25  | 125.9 | 1.05  |
| <b>Avasimibe</b>                | 166518-60-1  | free base          | P450 (e.g. CYP17)               | 104.1 | 0.75  | 69.0  | -0.62 | 94.4  | -0.17 | 81.2  | -0.37 |
| <b>AVL-292</b>                  | 1202757-89-8 | free base          | BTK                             | 76.1  | -0.43 | 81.3  | -0.17 |       |       | 92.1  | -0.02 |
| <b>Axitinib</b>                 | 319460-85-0  | free base          | c-Kit,VEGFR,PDGFR               | 121.5 | 1.49  | 114.8 | 1.05  | 80.9  | -0.75 | 96.1  | 0.10  |
| <b>AZ 3146</b>                  | 1124329-14-1 | free base          | Kinesin                         | 69.2  | -0.73 | 90.1  | 0.15  | 139.0 | 1.72  | 132.3 | 1.25  |
| <b>AZ 628</b>                   | 878739-06-1  | free base          | Raf                             | 72.3  | -0.60 | 37.8  | -1.75 | 56.6  | -1.78 | 104.0 | 0.35  |
| <b>AZ 960</b>                   | 905586-69-8  | free base          | JAK                             | 61.7  | -1.05 | 66.5  | -0.71 | 42.6  | -2.37 | 79.8  | -0.41 |
| <b>AZ20</b>                     | 1233339-22-4 | free base          | ATM/ATR                         | 57.6  | -1.22 | 46.2  | -1.45 | 80.3  | -0.77 | 58.4  | -1.09 |
| <b>Azacitidine</b>              | 320-67-2     | free base          | DNA Methyltransferase           | 117.9 | 1.33  | 115.6 | 1.08  | 117.0 | 0.79  | 80.7  | -0.38 |
| <b>Azatadine dimaleate</b>      | 3978-86-7    | maleate            | Histamine Receptor              | 96.0  | 0.40  | 81.6  | -0.16 | 111.0 | 0.53  | 123.3 | 0.96  |
| <b>AZD1080</b>                  | 612487-72-6  | free base          | GSK-3                           | 77.0  | -0.40 | 67.0  | -0.69 |       |       | 104.9 | 0.38  |
| <b>AZD1208</b>                  | 1204144-28-4 | free base          | Pim                             | 55.7  | -1.30 | 79.5  | -0.24 |       |       | 45.3  | -1.51 |
| <b>AZD1480</b>                  | 935666-88-9  | free base          | JAK                             | 80.1  | -0.27 | 103.2 | 0.63  | 77.2  | -0.90 | 74.1  | -0.59 |
| <b>AZD1981</b>                  | 802904-66-1  | free base          | GPR                             | 117.7 | 1.32  | 113.7 | 1.01  | 102.2 | 0.16  | 115.5 | 0.72  |
| <b>AZD2014</b>                  | 1009298-59-2 | free base          | mTOR                            | 57.7  | -1.21 | 60.5  | -0.93 | 71.9  | -1.13 | 61.8  | -0.98 |

|                                            |              |               |                        |       |       |       |       |       |       |       |       |
|--------------------------------------------|--------------|---------------|------------------------|-------|-------|-------|-------|-------|-------|-------|-------|
| <b>AZD2461</b>                             | 1174043-16-3 | free base     | PARP                   | 78.0  | -0.36 | 72.6  | -0.49 | 82.7  | -0.67 | 120.3 | 0.87  |
| <b>AZD2461</b>                             | 1174043-16-3 | free base     | PARP                   | 85.8  | -0.03 | 58.4  | -1.00 | 77.3  | -0.90 | 121.2 | 0.90  |
| <b>AZD2858</b>                             | 486424-20-8  | free base     | GSK-3                  | 74.5  | -0.50 | 104.8 | 0.68  |       |       | 70.6  | -0.70 |
| <b>AZD3463</b>                             | 1356962-20-3 | free base     | ALK                    | 30.8  | -2.36 | 69.0  | -0.62 |       |       | 69.6  | -0.74 |
| <b>AZD3514</b>                             | 1240299-33-5 | free base     | Androgen Receptor      | 80.3  | -0.26 | 107.6 | 0.79  | 77.7  | -0.88 | 94.7  | 0.06  |
| <b>AZD3514</b>                             | 1240299-33-5 | free base     | Androgen Receptor      | 81.4  | -0.21 | 79.2  | -0.25 | 79.8  | -0.79 | 114.9 | 0.70  |
| <b>AZD4547</b>                             | 1035270-39-3 | free base     | FGFR                   | 87.9  | 0.06  | 114.1 | 1.02  | 98.4  | 0.00  | 117.5 | 0.78  |
| <b>AZD5363</b>                             | 1143532-39-1 | free base     | Akt                    | 48.2  | -1.62 | 80.8  | -0.19 | 109.7 | 0.48  | 128.7 | 1.14  |
| <b>AZD5438</b>                             | 602306-29-6  | free base     | CDK                    | 69.5  | -0.71 | 51.8  | -1.25 | 99.0  | 0.02  | 86.4  | -0.20 |
| <b>AZD6482</b>                             | 1173900-33-8 | free base     | PI3K                   | 71.5  | -0.63 | 115.6 | 1.08  | 98.1  | -0.01 | 93.7  | 0.03  |
| <b>AZD7545</b>                             | 252017-04-2  | free base     | PDHK                   | 78.8  | -0.32 | 99.8  | 0.50  | 103.6 | 0.22  | 109.3 | 0.52  |
| <b>AZD7762</b>                             | 860352-01-8  | free base     | Chk                    | 46.6  | -1.69 | 13.7  | -2.63 | 112.7 | 0.60  | 19.6  | -2.32 |
| <b>AZD8055</b>                             | 1009298-09-2 | free base     | mTOR                   | 49.7  | -1.56 | 50.9  | -1.28 | 46.1  | -2.22 | 40.6  | -1.65 |
| <b>AZD8330</b>                             | 869357-68-6  | free base     | MEK                    | 100.9 | 0.61  | 23.9  | -2.26 | 42.5  | -2.38 | 102.7 | 0.31  |
| <b>AZD8931 (Sapitinib)</b>                 | 848942-61-0  | free base     | HER2,EGFR              | 109.5 | 0.98  | 60.2  | -0.94 | 75.4  | -0.98 | 79.9  | -0.41 |
| <b>AZD9291</b>                             | 1421373-65-0 | free base     | EGFR                   | 90.8  | 0.19  | 92.4  | 0.23  | 96.9  | -0.06 | 47.9  | -1.42 |
| <b>Azelastine HCl</b>                      | 79307-93-0   | hydrochloride | Histamine Receptor     | 110.0 | 1.00  | 111.0 | 0.91  | 124.1 | 1.09  | 131.4 | 1.22  |
| <b>Azelnidipine</b>                        | 123524-52-7  | free base     | Calcium Channel        | 75.7  | -0.45 | 73.9  | -0.44 | 109.3 | 0.46  | 120.5 | 0.88  |
| <b>Azilsartan</b>                          | 147403-03-0  | free base     | RAAS                   | 90.8  | 0.19  | 55.9  | -1.09 | 116.4 | 0.76  | 112.9 | 0.64  |
| <b>Azilsartan Medoxomil</b>                | 863031-21-4  | free base     | RAAS                   | 92.6  | 0.26  | 119.9 | 1.23  | 109.9 | 0.49  | 124.7 | 1.01  |
| <b>Azithromycin</b>                        | 83905-01-5   | free base     | Autophagy              | 83.5  | -0.12 | 108.8 | 0.83  | 114.2 | 0.67  | 81.8  | -0.35 |
| <b>Baicalein</b>                           | 491-67-8     | free base     | P450 (e.g. CYP17)      | 84.5  | -0.08 | 60.3  | -0.94 | 89.2  | -0.39 | 117.5 | 0.78  |
| <b>Bambuterol HCl</b>                      | 81732-46-9   | Salt          | Adrenergic Receptor    | 87.7  | 0.05  | 61.1  | -0.91 | 82.3  | -0.69 | 127.7 | 1.11  |
| <b>BAPTA-AM</b>                            | 126150-97-8  | free base     | Others                 | 68.3  | -0.77 | 70.1  | -0.58 | 94.8  | -0.16 | 95.6  | 0.09  |
| <b>Barasertib (AZD1152-HQPA)</b>           | 722544-51-6  | free base     | Aurora Kinase          | 90.6  | 0.18  | 82.0  | -0.14 | 74.4  | -1.02 | 62.1  | -0.97 |
| <b>Bardoxolone Methyl</b>                  | 218600-53-4  | free base     | IκB/IKK                | 45.1  | -1.75 | 31.2  | -1.99 | 78.1  | -0.86 | 57.1  | -1.13 |
| <b>Baricitinib (LY3009104, INCB028050)</b> | 1187594-09-7 | free base     | JAK                    | 71.6  | -0.63 | 94.9  | 0.33  | 125.6 | 1.15  | 102.8 | 0.32  |
| <b>Batimastat (BB-94)</b>                  | 130370-60-4  | free base     | MMP                    | 71.7  | -0.62 | 67.9  | -0.66 |       |       | 106.4 | 0.43  |
| <b>BAY 11-7082</b>                         | 19542-67-7   | free base     | IκB/IKK,E2 conjugating | 76.0  | -0.44 | 57.1  | -1.05 | 117.6 | 0.81  | 94.0  | 0.04  |

|                                        |              |               |                               |       |       |       |       |       |       |       |       |
|----------------------------------------|--------------|---------------|-------------------------------|-------|-------|-------|-------|-------|-------|-------|-------|
| <b>Bazedoxifene HCl</b>                | 198480-56-7  | free base     | Estrogen/progestogen Receptor | 119.9 | 1.42  | 99.9  | 0.50  | 102.9 | 0.19  | 80.0  | -0.40 |
| <b>Belinostat (PXD101)</b>             | 414864-00-9  | free base     | HDAC                          | 35.8  | -2.14 | 67.9  | -0.66 | 63.3  | -1.49 | 2.1   | -2.87 |
| <b>Benazepril HCl</b>                  | 86541-74-4   | hydrochloride | RAAS                          | 88.1  | 0.07  | 82.2  | -0.14 | 109.8 | 0.48  | 91.3  | -0.05 |
| <b>Benidipine HCl</b>                  | 91599-74-5   | hydrochloride | Calcium Channel               | 86.6  | 0.01  | 91.9  | 0.22  | 87.6  | -0.46 | 97.6  | 0.15  |
| <b>Benserazide HCl</b>                 | 14919-77-8   | hydrochloride | Dopamine Receptor,Others      | 113.2 | 1.14  | 66.7  | -0.70 | 127.8 | 1.25  | 107.6 | 0.47  |
| <b>Benzotropine mesylate</b>           | 132-17-2     | mesylate      | Histamine Receptor            | 97.4  | 0.47  | 117.4 | 1.14  | 110.9 | 0.53  | 124.3 | 1.00  |
| <b>Bepotastine Besilate</b>            | 190786-44-8  | besilate      | Histamine Receptor            | 79.9  | -0.27 | 78.5  | -0.27 | 107.8 | 0.40  | 120.9 | 0.89  |
| <b>Betahistine 2HCl</b>                | 5579-84-0    | 2HCl          | Histamine Receptor            | 91.9  | 0.23  | 117.5 | 1.14  | 116.5 | 0.77  | 145.1 | 1.66  |
| <b>Beta-Lapachone</b>                  | 4707-32-8    | free base     | Topoisomerase                 | 91.4  | 0.21  | 103.0 | 0.62  |       |       | 86.3  | -0.21 |
| <b>Betaxolol</b>                       | 659-18-7     | free base     | Adrenergic Receptor           | 99.4  | 0.55  | 115.9 | 1.09  | 95.2  | -0.14 | 149.9 | 1.81  |
| <b>Bethanechol chloride</b>            | 590-63-6     | chloride      | AChR                          | 106.0 | 0.83  | 112.3 | 0.96  | 119.0 | 0.87  | 117.1 | 0.77  |
| <b>Betulinic acid</b>                  | 472-15-1     | free base     | Topoisomerase                 | 95.2  | 0.37  | 116.2 | 1.10  | 114.4 | 0.68  | 95.0  | 0.07  |
| <b>BGT226 (NVP-BGT226)</b>             | 1245537-68-1 | free base     | PI3K,mTOR                     | 16.1  | -2.98 | 14.1  | -2.61 | 36.0  | -2.65 | -1.1  | -2.97 |
| <b>BI 2536</b>                         | 755038-02-9  | free base     | PLK                           | 40.8  | -1.93 | 39.2  | -1.70 | 43.0  | -2.36 | 4.4   | -2.80 |
| <b>BIBR 1532</b>                       | 321674-73-1  | free base     | Telomerase                    | 102.3 | 0.67  | 116.5 | 1.11  | 121.2 | 0.97  | 62.0  | -0.98 |
| <b>Bicalutamide</b>                    | 90357-06-5   | free base     | Androgen Receptor             | 105.7 | 0.82  | 107.2 | 0.77  | 135.0 | 1.55  | 75.0  | -0.57 |
| <b>BI-D1870</b>                        | 501437-28-1  | free base     | S6 Kinase                     | 83.2  | -0.13 | 82.3  | -0.14 | 105.2 | 0.29  | 73.4  | -0.61 |
| <b>BIIB021</b>                         | 848695-25-0  | free base     | HSP (e.g. HSP90)              | 52.1  | -1.45 | 38.7  | -1.72 | 66.7  | -1.35 | 27.4  | -2.07 |
| <b>BIO</b>                             | 667463-62-9  | free base     | GSK-3                         | 61.8  | -1.04 | 91.4  | 0.19  |       |       | 132.2 | 1.25  |
| <b>Biperiden HCl</b>                   | 1235-82-1    | hydrochloride | AChR                          | 106.7 | 0.86  | 115.0 | 1.05  | 119.5 | 0.90  | 95.3  | 0.08  |
| <b>BIRB 796 (Doramapimod)</b>          | 285983-48-4  | free base     | p38 MAPK                      | 96.0  | 0.41  | 115.6 | 1.08  | 87.9  | -0.45 | 65.2  | -0.88 |
| <b>Birinapant</b>                      | 1260251-31-7 | free base     | IAP                           | 85.4  | -0.04 | 92.5  | 0.24  | 82.3  | -0.68 | 127.3 | 1.09  |
| <b>Bisoprolol fumarate</b>             | 104344-23-2  | free base     | Adrenergic Receptor           | 106.6 | 0.85  | 85.8  | -0.01 | 112.7 | 0.61  | 100.8 | 0.25  |
| <b>BIX 01294</b>                       | 1392399-03-9 | hydrochloride | Histone Methyltransferase     | 71.2  | -0.65 | 62.8  | -0.84 | 103.0 | 0.19  | 100.3 | 0.24  |
| <b>BIX 02188</b>                       | 1094614-84-2 | free base     | MEK                           | 84.0  | -0.10 | 115.8 | 1.08  | 114.4 | 0.68  | 95.2  | 0.08  |
| <b>BIX 02189</b>                       | 1094614-85-3 | free base     | MEK                           | 84.5  | -0.08 | 116.2 | 1.10  | 111.1 | 0.54  | 96.3  | 0.11  |
| <b>BKM120 (NVP-BKM120, Buparlisib)</b> | 944396-07-0  | free base     | PI3K                          | 75.8  | -0.45 | 98.2  | 0.44  | 76.4  | -0.94 | 63.3  | -0.93 |
| <b>BML-190</b>                         | 2854-32-2    | free base     | Cannabinoid Receptor          | 91.3  | 0.21  | 93.1  | 0.26  | 110.2 | 0.50  | 114.1 | 0.68  |

|                                         |              |                 |                           |       |       |       |       |       |       |       |       |
|-----------------------------------------|--------------|-----------------|---------------------------|-------|-------|-------|-------|-------|-------|-------|-------|
| <b>BMN 673</b>                          | 1207456-01-6 | free base       | PARP                      | 60.2  | -1.11 | 106.1 | 0.73  | 86.5  | -0.51 | 33.8  | -1.87 |
| <b>BMS-265246</b>                       | 582315-72-8  | free base       | CDK                       | 81.4  | -0.21 | 110.6 | 0.90  | 86.5  | -0.51 | 87.1  | -0.18 |
| <b>BMS-345541</b>                       | 445430-58-0  | free base       | IκB/IKK                   | 88.7  | 0.10  | 77.7  | -0.30 | 109.4 | 0.47  | 124.7 | 1.01  |
| <b>BMS-378806</b>                       | 357263-13-9  | free base       | gp120/CD4                 | 98.0  | 0.49  | 111.9 | 0.94  | 108.8 | 0.44  | 123.7 | 0.98  |
| <b>BMS-536924</b>                       | 468740-43-4  | free base       | IGF-1R                    | 33.2  | -2.25 | 80.2  | -0.21 | 53.2  | -1.92 | 110.3 | 0.56  |
| <b>BMS-707035</b>                       | 729607-74-3  | free base       | Integrase                 | 51.9  | -1.46 | 46.2  | -1.45 | 63.4  | -1.49 | 29.1  | -2.02 |
| <b>BMS-754807</b>                       | 1001350-96-4 | free base       | IGF-1R,Trk receptor,c-Met | 28.2  | -2.47 | 49.9  | -1.31 | 45.8  | -2.24 | 55.0  | -1.20 |
| <b>BMS-777607</b>                       | 1025720-94-8 | free base       | Axl,c-Met                 | 104.9 | 0.79  | 115.3 | 1.06  | 112.9 | 0.61  | 78.5  | -0.45 |
| <b>BMS-794833</b>                       | 1174046-72-0 | free base       | VEGFR,c-Met               | 100.8 | 0.61  | 50.5  | -1.29 | 138.8 | 1.71  | 98.9  | 0.19  |
| <b>BMS-833923</b>                       | 1059734-66-5 | free base       | Hedgehog/Smoothened       | 74.8  | -0.49 | 93.8  | 0.28  |       |       | 117.3 | 0.78  |
| <b>BMV 7378</b>                         | 21102-95-4   | dihydrochloride | 5-HT Receptor             | 69.5  | -0.72 | 91.2  | 0.19  | 137.7 | 1.67  | 91.8  | -0.03 |
| <b>Bortezomib (PS-341)</b>              | 179324-69-7  | free base       | Proteasome                | 5.2   | -3.44 | 2.4   | -3.04 | 27.5  | -3.01 | 3.6   | -2.83 |
| <b>Bosentan</b>                         | 147536-97-8  | free base       | Endothelin Receptor       | 84.3  | -0.09 | 71.7  | -0.52 | 78.6  | -0.84 | 129.2 | 1.15  |
| <b>Bosentan Hydrate</b>                 | 157212-55-0  | hydrate         | Endothelin Receptor       | 98.0  | 0.49  | 78.5  | -0.27 | 112.7 | 0.60  | 128.8 | 1.14  |
| <b>Bosutinib (SKI-606)</b>              | 380843-75-4  | free base       | Src                       | 80.9  | -0.23 | 94.6  | 0.31  | 142.3 | 1.86  | 127.3 | 1.09  |
| <b>Brefeldin A</b>                      | 20350-15-6   | free base       | ATPase,Autophagy          | 1.9   | -3.58 | 1.7   | -3.06 | 23.2  | -3.20 | 2.1   | -2.87 |
| <b>Brinzolamide</b>                     | 138890-62-7  | free base       | Carbonic Anhydrase        | 89.9  | 0.15  | 63.6  | -0.81 | 109.7 | 0.48  | 142.7 | 1.58  |
| <b>Brivanim (BMS-540215)</b>            | 649735-46-6  | free base       | FGFR,VEGFR                | 94.4  | 0.34  | 76.5  | -0.34 | 78.5  | -0.85 | 116.5 | 0.75  |
| <b>Brivanim Alaninate (BMS-582664)</b>  | 649735-63-7  | alaninate       | VEGFR,FGFR                | 97.0  | 0.45  | 88.2  | 0.08  | 92.7  | -0.25 | 74.5  | -0.58 |
| <b>BRL-15572</b>                        | 193611-72-2  | dihydrochloride | 5-HT Receptor             | 120.0 | 1.42  | 73.0  | -0.47 | 123.6 | 1.07  | 113.9 | 0.67  |
| <b>BRL-54443</b>                        | 57477-39-1   | free base       | 5-HT Receptor             | 102.2 | 0.67  | 93.3  | 0.27  | 127.7 | 1.24  | 84.6  | -0.26 |
| <b>Bromosporine</b>                     | N/A          | free base       | Epigenetic Reader Domain  | 49.5  | -1.56 | 69.9  | -0.59 |       |       | 62.4  | -0.96 |
| <b>Brompheniramine hydrogen maleate</b> | 980-71-2     | maleate         | Histamine Receptor        | 81.8  | -0.20 | 56.1  | -1.09 | 123.2 | 1.05  | 91.0  | -0.06 |
| <b>BS-181 HCl</b>                       | 1397219-81-6 | hydrochloride   | CDK                       | 99.9  | 0.57  | 47.1  | -1.42 | 106.1 | 0.33  | 93.2  | 0.01  |
| <b>BTB06584</b>                         | 219793-45-0  | free base       | Fo-ATPase                 | 131.0 | 1.89  | 109.3 | 0.85  | 98.8  | 0.01  | 130.4 | 1.19  |
| <b>Bufexamac</b>                        | 2438-72-4    | free base       | COX                       | 96.0  | 0.41  | 88.1  | 0.08  | 111.0 | 0.53  | 131.1 | 1.21  |
| <b>Bupivacaine HCl</b>                  | 18010-40-7   | hydrochloride   | cAMP                      | 118.6 | 1.36  | 82.2  | -0.14 | 120.6 | 0.94  | 113.5 | 0.65  |
| <b>Butein</b>                           | 487-52-5     | free base       | EGFR                      | 78.9  | -0.32 | 75.3  | -0.39 | 85.3  | -0.56 | 139.8 | 1.49  |



|                                         |              |               |                                  |       |       |       |       |       |       |       |       |
|-----------------------------------------|--------------|---------------|----------------------------------|-------|-------|-------|-------|-------|-------|-------|-------|
| <b>BV-6</b>                             | 1001600-56-1 | free base     | IAP                              | 62.1  | -1.03 | 83.0  | -0.11 | 105.3 | 0.29  | 113.0 | 0.64  |
| <b>BX-795</b>                           | 702675-74-9  | free base     | IκB/IKK,PDK-1                    | 69.6  | -0.71 | 68.6  | -0.63 | 117.0 | 0.79  | 65.8  | -0.86 |
| <b>BX-912</b>                           | 702674-56-4  | free base     | PDK-1                            | 93.0  | 0.28  | 84.5  | -0.06 | 93.2  | -0.22 | 54.0  | -1.23 |
| <b>BYL719</b>                           | 1217486-61-7 | free base     | PI3K                             | 54.1  | -1.37 | 111.9 | 0.94  | 85.0  | -0.57 | 107.0 | 0.45  |
| <b>C646</b>                             | 328968-36-1  | free base     | Histone Acetyltransferase        | 75.3  | -0.47 | 90.8  | 0.17  |       |       | 125.5 | 1.04  |
| <b>Cabozantinib (XL184, BMS-907351)</b> | 849217-68-1  | free base     | FLT3,Tie-2,c-Kit,c-Met,VEGFR,Axl | 123.9 | 1.59  | 109.6 | 0.86  | 132.4 | 1.44  | 89.1  | -0.12 |
| <b>Cabozantinib malate (XL184)</b>      | 1140909-48-3 | Malate        | VEGFR                            | 74.8  | -0.49 | 118.5 | 1.18  | 104.0 | 0.23  | 118.6 | 0.82  |
| <b>Caffeic Acid Phenethyl Ester</b>     | 104594-70-9  | free base     | NF-κB                            | 82.2  | -0.18 | 116.4 | 1.11  | 102.0 | 0.15  | 55.3  | -1.19 |
| <b>CAL-101 (Idelalisib, GS-1101)</b>    | 870281-82-6  | free base     | PI3K                             | 82.1  | -0.18 | 75.2  | -0.39 | 74.7  | -1.01 | 112.4 | 0.62  |
| <b>Camptothecin</b>                     | 7689-03-4    | free base     | Topoisomerase                    | 30.7  | -2.36 | 14.5  | -2.60 | 96.3  | -0.09 | 3.4   | -2.83 |
| <b>Canagliflozin</b>                    | 842133-18-0  | free base     | SGLT                             | 88.8  | 0.10  | 51.4  | -1.26 | 110.2 | 0.50  | 123.4 | 0.97  |
| <b>Candesartan</b>                      | 139481-59-7  | free base     | RAAS                             | 90.9  | 0.19  | 114.7 | 1.04  | 111.0 | 0.53  | 90.2  | -0.08 |
| <b>Candesartan Cilexetil</b>            | 145040-37-5  | free base     | RAAS                             | 121.6 | 1.49  | 93.2  | 0.26  | 111.4 | 0.55  | 111.8 | 0.60  |
| <b>Captopril</b>                        | 62571-86-2   | free base     | RAAS                             | 118.3 | 1.35  | 114.4 | 1.03  | 110.2 | 0.50  | 122.2 | 0.93  |
| <b>Carbamazepine</b>                    | 298-46-4     | free base     | Autophagy,Sodium Channel         | 117.8 | 1.33  | 113.9 | 1.01  | 104.2 | 0.25  | 93.1  | 0.01  |
| <b>Carfilzomib (PR-171)</b>             | 868540-17-4  | free base     | Proteasome                       | 22.9  | -2.69 | 1.7   | -3.06 | 23.2  | -3.20 | 2.2   | -2.87 |
| <b>Carteolol HCl</b>                    | 51781-21-6   | Salt          | Adrenergic Receptor              | 75.0  | -0.48 | 113.1 | 0.99  | 81.7  | -0.71 | 93.0  | 0.00  |
| <b>Carvedilol</b>                       | 72956-09-3   | free base     | Adrenergic Receptor              | 129.3 | 1.82  | 112.9 | 0.98  | 109.1 | 0.45  | 105.3 | 0.40  |
| <b>CAY10505</b>                         | 1218777-13-9 | free base     | PI3K                             | 76.2  | -0.43 | 57.6  | -1.03 | 110.6 | 0.51  | 123.2 | 0.96  |
| <b>CCT128930</b>                        | 885499-61-6  | free base     | Akt                              | 87.3  | 0.04  | 64.5  | -0.78 | 94.3  | -0.18 | 89.9  | -0.09 |
| <b>CCT129202</b>                        | 942947-93-5  | free base     | Aurora Kinase                    | 57.2  | -1.24 | 57.1  | -1.05 | 86.4  | -0.51 | 59.3  | -1.06 |
| <b>CCT137690</b>                        | 1095382-05-0 | free base     | Aurora Kinase                    | 64.5  | -0.93 | 57.3  | -1.04 | 68.0  | -1.29 | 97.1  | 0.14  |
| <b>Cediranib (AZD2171)</b>              | 288383-20-0  | free base     | VEGFR                            | 93.5  | 0.30  | 115.8 | 1.08  | 103.2 | 0.20  | 109.2 | 0.52  |
| <b>Celecoxib</b>                        | 169590-42-5  | free base     | COX                              | 106.7 | 0.86  | 79.4  | -0.24 | 103.3 | 0.21  | 83.1  | -0.31 |
| <b>CEP-18770 (Delanzomib)</b>           | 847499-27-8  | free base     | Proteasome                       | 3.5   | -3.51 | 3.4   | -3.00 | 33.6  | -2.75 | 1.3   | -2.90 |
| <b>CEP-32496</b>                        | 1188910-76-0 | free base     | CSF-1R,Raf                       | 81.7  | -0.20 | 57.8  | -1.02 | 85.4  | -0.56 | 67.8  | -0.79 |
| <b>CEP-33779</b>                        | 1257704-57-6 | free base     | JAK                              | 83.9  | -0.11 | 64.0  | -0.80 | 119.6 | 0.90  | 116.4 | 0.75  |
| <b>Cetirizine DiHCl</b>                 | 83881-52-1   | hydrochloride | Histamine Receptor               | 91.2  | 0.20  | 54.9  | -1.13 | 153.2 | 2.33  | 95.7  | 0.09  |

|                                 |              |               |                                     |        |       |       |       |       |       |       |       |
|---------------------------------|--------------|---------------|-------------------------------------|--------|-------|-------|-------|-------|-------|-------|-------|
| <b>CFTRinh-172</b>              | 307510-92-5  | free base     | CFTR                                | 78.5   | -0.33 | 50.4  | -1.29 |       |       | 91.6  | -0.04 |
| <b>CGI1746</b>                  | 910232-84-7  | free base     | BTK                                 | 77.1   | -0.39 | 82.6  | -0.12 | 107.5 | 0.38  | 107.6 | 0.47  |
| <b>CGK 733</b>                  | 905973-89-9  | free base     | ATM/ATR                             | 79.7   | -0.28 | 55.4  | -1.11 |       |       | 114.9 | 0.70  |
| <b>CGP 57380</b>                | 522629-08-9  | free base     | MNK                                 | 77.1   | -0.40 | 116.0 | 1.09  | 119.6 | 0.90  | 103.6 | 0.34  |
| <b>CGS 21680 HCl</b>            | 124431-80-7  | hydrochloride | 5-alpha Reductase                   | 117.80 | 1.33  | 60.4  | -0.93 | 92.5  | -0.26 | 120.7 | 0.88  |
| <b>CH5132799</b>                | 1007207-67-1 | free base     | mTOR,PI3K                           | 58.6   | -1.18 | 50.3  | -1.30 | 102.4 | 0.17  | 126.7 | 1.07  |
| <b>CH5138303</b>                | 959763-06-5  | free base     | HSP (e.g. HSP90)                    | 42.2   | -1.87 | 33.9  | -1.89 | 48.0  | -2.15 | 55.9  | -1.17 |
| <b>CHIR-124</b>                 | 405168-58-3  | free base     | Chk                                 | 53.0   | -1.42 | 30.2  | -2.03 | 144.9 | 1.97  | 53.2  | -1.25 |
| <b>CHIR-99021 (CT99021) HCl</b> | 252917-06-9  | hydrochloride | GSK-3                               | 84.2   | -0.10 | 50.3  | -1.30 | 116.0 | 0.75  | 119.7 | 0.85  |
| <b>Chloroambucil</b>            | 305-03-3     | free base     | DNA/RNA Synthesis                   | 85.8   | -0.03 | 118.1 | 1.17  | 100.8 | 0.10  | 102.7 | 0.31  |
| <b>Chlorpheniramine Maleate</b> | 113-92-8     | maleate       | Histamine Receptor                  | 105.1  | 0.79  | 117.5 | 1.14  | 112.5 | 0.60  | 94.2  | 0.04  |
| <b>Chlorpromazine HCl</b>       | 69-09-0      | hydrochloride | Potassium Channel,Dopamine Receptor | 105.2  | 0.80  | 79.8  | -0.23 | 117.9 | 0.83  | 90.5  | -0.07 |
| <b>Chlorprothixene</b>          | 113-59-7     | free base     | Dopamine Receptor                   | 105.9  | 0.83  | 112.8 | 0.97  | 105.5 | 0.30  | 108.2 | 0.49  |
| <b>Chrysophanic Acid</b>        | 481-74-3     | free base     | mTOR,EGFR                           | 137.7  | 2.17  | 110.4 | 0.89  | 86.0  | -0.53 | 124.8 | 1.01  |
| <b>CI994 (Tacedinaline)</b>     | 112522-64-2  | free base     | HDAC                                | 83.1   | -0.14 | 111.9 | 0.94  | 145.7 | 2.01  | 136.8 | 1.39  |
| <b>Ciclopirox ethanolamine</b>  | 41621-49-2   | ethanolamine  | ATPase                              | 117.0  | 1.30  | 111.8 | 0.94  | 111.2 | 0.54  | 102.3 | 0.30  |
| <b>Cilazapril Monohydrate</b>   | 92077-78-6   | monohydrate   | RAAS                                | 95.3   | 0.38  | 115.8 | 1.08  | 82.2  | -0.69 | 93.1  | 0.01  |
| <b>Cilengitide</b>              | 188968-51-6  | free base     | Integrin                            | 85.7   | -0.03 | 70.4  | -0.57 | 60.7  | -1.60 | 103.8 | 0.35  |
| <b>Cilnidipine</b>              | 132203-70-4  | free base     | Calcium Channel                     | 114.2  | 1.18  | 76.6  | -0.34 | 118.8 | 0.87  | 69.4  | -0.74 |
| <b>Cilomilast</b>               | 153259-65-5  | free base     | PDE                                 | 91.7   | 0.22  | 66.3  | -0.72 | 132.1 | 1.43  | 67.3  | -0.81 |
| <b>Cilostazol</b>               | 73963-72-1   | free base     | PDE                                 | 74.2   | -0.52 | 60.4  | -0.93 | 117.4 | 0.80  | 93.2  | 0.01  |
| <b>Cimetidine</b>               | 51481-61-9   | free base     | Histamine Receptor                  | 94.4   | 0.34  | 107.3 | 0.77  | 123.3 | 1.06  | 121.0 | 0.89  |
| <b>Cinacalcet HCl</b>           | 364782-34-3  | hydrochloride | CaSR                                | 102.0  | 0.66  | 77.5  | -0.31 | 108.7 | 0.43  | 85.6  | -0.23 |
| <b>Ciprofibrate</b>             | 52214-84-3   | free base     | PPAR                                | 125.4  | 1.65  | 90.1  | 0.15  | 112.5 | 0.60  | 111.7 | 0.60  |
| <b>Ciproxifan</b>               | 184025-18-1  | maleate       | Histamine Receptor                  | 91.6   | 0.22  | 46.8  | -1.43 | 128.1 | 1.26  | 109.5 | 0.53  |
| <b>Cisatracurium Besylate</b>   | 96946-42-8   | besylate      | Adrenergic Receptor                 | 124.9  | 1.63  | 106.8 | 0.76  | 83.7  | -0.63 | 108.1 | 0.48  |
| <b>CK-636</b>                   | 442632-72-6  | free base     | Arp2/3                              | 98.1   | 0.49  | 116.9 | 1.12  | 100.8 | 0.10  | 83.5  | -0.30 |
| <b>Clarithromycin</b>           | 81103-11-9   | free base     | P450 (e.g. CYP17)                   | 101.7  | 0.65  | 55.7  | -1.10 | 115.2 | 0.71  | 123.6 | 0.98  |

|                                 |              |               |                                |       |       |       |       |       |       |       |       |
|---------------------------------|--------------|---------------|--------------------------------|-------|-------|-------|-------|-------|-------|-------|-------|
| <b>Clemastine Fumarate</b>      | 14976-57-9   | free base     | Histamine Receptor             | 106.5 | 0.85  | 117.1 | 1.13  | 110.4 | 0.51  | 97.9  | 0.16  |
| <b>Clevidipine Butyrate</b>     | 167221-71-8  | free base     | Calcium Channel                | 98.6  | 0.52  | 112.7 | 0.97  | 101.1 | 0.11  | 101.5 | 0.27  |
| <b>Clinofibrate</b>             | 30299-08-2   | free base     | RAAS                           | 100.8 | 0.61  | 113.9 | 1.01  | 126.6 | 1.20  | 110.3 | 0.56  |
| <b>Clomifene citrate</b>        | 50-41-9      | citrate       | Estrogen/progestogen Receptor  | 75.6  | -0.46 | 51.1  | -1.27 | 137.2 | 1.65  | 128.3 | 1.12  |
| <b>Clomipramine HCl</b>         | 17321-77-6   | hydrochloride | 5-HT Receptor                  | 95.8  | 0.40  | 49.6  | -1.32 | 109.6 | 0.47  | 123.3 | 0.96  |
| <b>Clonidine HCl</b>            | 4205-91-8    | hydrochloride | Adrenergic Receptor, Autophagy | 109.7 | 0.99  | 109.0 | 0.83  | 121.3 | 0.97  | 115.8 | 0.73  |
| <b>Clopidogrel</b>              | 120202-66-6  | sulfate       | P2 Receptor                    | 98.9  | 0.53  | 60.2  | -0.94 | 150.6 | 2.21  | 77.5  | -0.48 |
| <b>Clozapine</b>                | 5786-21-0    | free base     | 5-HT Receptor                  | 108.6 | 0.94  | 66.8  | -0.70 | 123.4 | 1.06  | 96.4  | 0.11  |
| <b>CNX-2006</b>                 | 1375465-09-0 | free base     | EGFR                           | 72.9  | -0.57 | 76.0  | -0.37 |       |       | 120.9 | 0.89  |
| <b>CNX-774</b>                  | 1202759-32-7 | free base     | BTK                            | 85.1  | -0.05 | 85.1  | -0.03 |       |       | 108.5 | 0.50  |
| <b>CO-1686 (AVL-301)</b>        | 1374640-70-6 | free base     | EGFR                           | 64.0  | -0.95 | 116.4 | 1.10  | 96.5  | -0.08 | 76.4  | -0.52 |
| <b>Cobicistat (GS-9350)</b>     | 1004316-88-4 | free base     | P450 (e.g. CYP17)              | 77.4  | -0.38 | 115.6 | 1.08  | 121.4 | 0.97  | 96.0  | 0.10  |
| <b>CORM-3</b>                   | 475473-26-8  | free base     | Others                         | 78.0  | -0.36 | 71.6  | -0.52 | 81.8  | -0.71 | 80.8  | -0.38 |
| <b>Costunolide</b>              | 553-21-9     | free base     | Telomerase                     | 75.1  | -0.48 | 115.0 | 1.05  | 128.1 | 1.26  | 106.6 | 0.44  |
| <b>CP-673451</b>                | 343787-29-1  | free base     | PDGFR                          | 96.2  | 0.41  | 115.2 | 1.06  | 162.6 | 2.72  | 100.7 | 0.25  |
| <b>CP-724714</b>                | 537705-08-1  | free base     | EGFR,HER2                      | 97.6  | 0.48  | 106.1 | 0.73  | 116.6 | 0.77  | 87.0  | -0.18 |
| <b>CP-91149</b>                 | 186392-40-5  | free base     | Phosphorylase                  | 101.9 | 0.66  | 81.9  | -0.15 | 124.4 | 1.10  | 125.1 | 1.02  |
| <b>CPI-203</b>                  | 1446144-04-2 | free base     | Epigenetic Reader Domain       | 26.6  | -2.53 | 48.8  | -1.35 | 61.2  | -1.58 | 5.5   | -2.77 |
| <b>CPI-613</b>                  | 95809-78-2   | free base     | Dehydrogenase                  | 105.5 | 0.81  | 65.8  | -0.73 | 115.6 | 0.73  | 112.3 | 0.62  |
| <b>Crenolanib (CP-868596)</b>   | 670220-88-9  | free base     | PDGFR                          | 66.1  | -0.86 | 48.4  | -1.37 | 163.6 | 2.77  | 137.3 | 1.41  |
| <b>Crizotinib (PF-02341066)</b> | 877399-52-5  | free base     | c-Met,ALK                      | 58.4  | -1.19 | 95.6  | 0.35  | 102.7 | 0.18  | 84.3  | -0.27 |
| <b>CRT0044876</b>               | 6960-45-8    | free base     | APE                            | 81.8  | -0.20 | 104.0 | 0.66  | 78.0  | -0.87 | 69.2  | -0.75 |
| <b>Cryptotanshinone</b>         | 35825-57-1   | free base     | STAT                           | 106.1 | 0.83  | 49.5  | -1.33 | 97.5  | -0.04 | 91.1  | -0.05 |
| <b>CTEP (RO4956371)</b>         | 871362-31-1  | free base     | GluR                           | 96.8  | 0.44  | 114.7 | 1.04  | 114.5 | 0.68  | 116.7 | 0.76  |
| <b>CUDC-101</b>                 | 1012054-59-9 | free base     | HDAC,HER2,EGFR                 | 7.9   | -3.33 | 48.6  | -1.36 | 36.2  | -2.64 | 0.3   | -2.93 |
| <b>CUDC-907</b>                 | 1339928-25-4 | free base     | PI3K,HDAC                      | 73.1  | -0.57 | 114.9 | 1.05  | 104.6 | 0.26  | 94.7  | 0.06  |
| <b>CW069</b>                    |              | free base     | Microtubule Associat           | 76.9  | -0.40 | 116.1 | 1.10  | 95.5  | -0.12 | 75.2  | -0.56 |
| <b>CX-6258 HCl</b>              | 1353859-00-3 | Salt          | Pim                            | 58.2  | -1.20 | 75.4  | -0.39 | 66.6  | -1.35 | 11.4  | -2.58 |

|                                         |              |               |                                  |       |       |       |       |       |       |       |       |
|-----------------------------------------|--------------|---------------|----------------------------------|-------|-------|-------|-------|-------|-------|-------|-------|
| <b>CX-6258 HCl</b>                      | 1353859-00-3 | Salt          | Pim                              | 64.7  | -0.92 | 106.5 | 0.75  | 68.6  | -1.27 | 26.4  | -2.11 |
| <b>CYC116</b>                           | 693228-63-6  | free base     | Aurora Kinase,VEGFR              | 98.4  | 0.51  | 81.1  | -0.18 | 92.2  | -0.27 | 86.0  | -0.22 |
| <b>Cyclizine 2HCl</b>                   | 5897-18-7    | hydrochloride | Histamine Receptor               | 132.2 | 1.94  | 118.5 | 1.18  | 95.6  | -0.12 | 124.5 | 1.00  |
| <b>Cyclobenzaprine HCl</b>              | 6202-23-9    | Salt          | Others                           | 77.0  | -0.40 | 117.4 | 1.14  | 81.2  | -0.73 | 101.8 | 0.28  |
| <b>Cyproheptadine HCl</b>               | 969-33-5     | hydrochloride | Histamine Receptor               | 100.1 | 0.58  | 110.7 | 0.90  | 97.3  | -0.05 | 122.7 | 0.95  |
| <b>Cyproterone Acetate</b>              | 427-51-0     | acetate       | Androgen Receptor                | 103.4 | 0.72  | 115.8 | 1.08  | 106.2 | 0.33  | 94.6  | 0.06  |
| <b>CYT387</b>                           | 1056634-68-4 | free base     | JAK                              | 90.3  | 0.17  | 57.8  | -1.03 | 96.8  | -0.07 | 102.3 | 0.30  |
| <b>CYT997 (Lexibulin)</b>               | 917111-44-5  | free base     | Microtubule Associat             | 55.5  | -1.31 | 52.5  | -1.22 | 43.3  | -2.34 | 27.7  | -2.06 |
| <b>CZC24832</b>                         | 1159824-67-5 | free base     | PI3K                             | 84.4  | -0.08 | 106.1 | 0.73  | 82.1  | -0.69 | 100.5 | 0.24  |
| <b>Dabrafenib (GSK2118436)</b>          | 1195765-45-7 | free base     | Raf                              | 96.4  | 0.42  | 113.9 | 1.01  | 197.9 | 4.22  | 128.4 | 1.13  |
| <b>Daclatasvir (BMS-790052)</b>         | 1009119-64-5 | free base     | HCV Protease                     | 149.9 | 2.69  | 106.5 | 0.75  | 116.7 | 0.78  | 60.9  | -1.01 |
| <b>Dacomitinib (PF299804, PF299)</b>    | 1110813-31-4 | free base     | EGFR                             | 113.4 | 1.14  | 114.1 | 1.02  | 101.9 | 0.14  | 87.5  | -0.17 |
| <b>Dalcatrapib (JTT-705, RO4607381)</b> | 211513-37-0  | free base     | CETP                             | 69.3  | -0.72 | 115.3 | 1.07  | 121.7 | 0.99  | 139.4 | 1.48  |
| <b>Danoprevir (ITMN-191)</b>            | 850876-88-9  | free base     | HCV Protease                     | 120.2 | 1.43  | 114.2 | 1.02  | 104.6 | 0.26  | 107.3 | 0.46  |
| <b>Danusertib (PHA-739358)</b>          | 827318-97-8  | free base     | c-RET,FGFR,Bcr-Abl,Aurora Kinase |       |       | 71.1  | -0.54 | 41.3  | -2.43 | 61.0  | -1.01 |
| <b>Dapagliflozin</b>                    | 461432-26-8  | free base     | SGLT                             | 117.4 | 1.31  | 91.9  | 0.21  | 109.6 | 0.47  | 93.2  | 0.01  |
| <b>Dapivirine (TMC120)</b>              | 244767-67-7  | free base     | Reverse Transcriptase            | 82.9  | -0.15 | 57.1  | -1.05 | 127.4 | 1.23  | 121.5 | 0.91  |
| <b>Dapoxetine HCl</b>                   | 129938-20-1  | hydrochloride | 5-HT Receptor                    | 100.2 | 0.59  | 60.2  | -0.94 | 106.2 | 0.33  | 133.9 | 1.30  |
| <b>DAPT (GSI-IX)</b>                    | 208255-80-5  | free base     | Gamma-secretase,Beta Amyloid     | 110.0 | 1.00  | 79.4  | -0.24 | 81.5  | -0.72 | 116.7 | 0.76  |
| <b>Darapladib (SB-480848)</b>           | 356057-34-6  | free base     | Phospholipase (e.g.              | 86.3  | 0.00  | 65.3  | -0.75 | 100.4 | 0.08  | 124.4 | 1.00  |
| <b>Darifenacin HBr</b>                  | 133099-07-7  | HBr           | AChR                             | 93.2  | 0.29  | 53.4  | -1.18 | 114.1 | 0.66  | 113.8 | 0.66  |
| <b>Darunavir Ethanolate</b>             | 635728-49-3  | ethanolate    | HIV Protease                     | 88.0  | 0.07  | 114.7 | 1.05  | 94.4  | -0.17 | 97.1  | 0.14  |
| <b>Dasatinib</b>                        | 302962-49-8  | free base     | Bcr-Abl,c-Kit,Src                | 110.5 | 1.02  | 117.1 | 1.13  | 115.3 | 0.72  | 93.6  | 0.02  |
| <b>Daunorubicin HCl</b>                 | 23541-50-6   | hydrochloride | Telomerase                       | 25.9  | -2.57 | 65.0  | -0.76 | 117.3 | 0.80  | 12.1  | -2.56 |
| <b>DBeQ</b>                             | 177355-84-9  | free base     | p97                              | 77.2  | -0.39 | 109.0 | 0.83  |       |       | 77.4  | -0.49 |
| <b>DCC-2036 (Rebastinib)</b>            | 1020172-07-9 | free base     | Bcr-Abl                          | 69.1  | -0.73 | 62.7  | -0.85 | 83.4  | -0.64 | 124.1 | 0.99  |
| <b>Decamethonium Bromide</b>            | 541-22-0     | bromide       | AChR                             | 93.5  | 0.30  | 116.6 | 1.11  | 112.4 | 0.59  | 89.1  | -0.12 |
| <b>Decitabine</b>                       | 2353-33-5    | free base     | DNA Methyltransferase            | 90.2  | 0.16  | 102.1 | 0.58  | 104.4 | 0.25  | 58.6  | -1.08 |

|                                          |              |               |                               |       |       |       |       |       |       |       |       |
|------------------------------------------|--------------|---------------|-------------------------------|-------|-------|-------|-------|-------|-------|-------|-------|
| <b>Degrasyn (WP1130)</b>                 | 856243-80-6  | free base     | DUB,Bcr-Abl                   | 102.3 | 0.67  | 93.0  | 0.26  | 92.6  | -0.25 | 77.6  | -0.48 |
| <b>Dehydroepiandrosterone (DHEA)</b>     | 53-43-0      | free base     | Androgen Receptor             | 109.2 | 0.97  | 102.7 | 0.61  | 125.8 | 1.16  | 127.8 | 1.11  |
| <b>Deltarasin</b>                        | 1440898-61-2 | free base     | PDE                           | 85.4  | -0.04 | 92.8  | 0.25  |       |       | 86.9  | -0.19 |
| <b>Demeclocycline HCl</b>                | 64-73-3      | Salt          | Others                        | 67.8  | -0.79 | 117.3 | 1.14  | 77.0  | -0.91 | 107.4 | 0.46  |
| <b>Desloratadine</b>                     | 100643-71-8  | free base     | Histamine Receptor            | 115.8 | 1.24  | 116.0 | 1.09  | 109.3 | 0.46  | 95.0  | 0.07  |
| <b>Desvenlafaxine</b>                    | 93413-62-8   | free base     | 5-HT Receptor                 | 97.9  | 0.49  | 67.2  | -0.68 | 90.4  | -0.34 | 126.3 | 1.06  |
| <b>Desvenlafaxine Succinate</b>          | 386750-22-7  | succinate     | 5-HT Receptor                 | 155.8 | 2.94  | 117.8 | 1.16  | 100.2 | 0.07  | 122.2 | 0.93  |
| <b>Detomidine HCl</b>                    | 90038-01-0   | hydrochloride | Adrenergic Receptor           | 121.2 | 1.47  | 114.8 | 1.05  | 94.5  | -0.17 | 125.9 | 1.05  |
| <b>Dexamethasone (DHAP)</b>              | 50-02-2      | free base     | Autophagy,IL Receptor         | 81.8  | -0.20 | 115.5 | 1.07  | 160.5 | 2.64  | 68.3  | -0.78 |
| <b>Dexmedetomidine</b>                   | 113775-47-6  | free base     | Adrenergic Receptor           | 89.9  | 0.15  | 118.1 | 1.17  | 115.9 | 0.74  | 124.9 | 1.02  |
| <b>Dibucaine HCl</b>                     | 61-12-1      | free base     | Sodium Channel                | 76.2  | -0.43 | 118.0 | 1.16  | 101.0 | 0.11  | 137.9 | 1.43  |
| <b>Diclofenac Sodium</b>                 | 15307-79-6   | sodium        | COX                           | 93.1  | 0.28  | 117.5 | 1.14  | 104.6 | 0.26  | 105.3 | 0.39  |
| <b>Dicoumarol</b>                        | 66-76-2      | free base     | Others                        | 74.6  | -0.50 | 79.7  | -0.23 | 77.6  | -0.89 | 128.0 | 1.12  |
| <b>Didanosine</b>                        | 69655-05-6   | free base     | Reverse Transcriptase         | 95.4  | 0.38  | 114.6 | 1.04  | 79.4  | -0.81 | 98.6  | 0.18  |
| <b>Dienogest</b>                         | 65928-58-7   | free base     | Estrogen/progestogen Receptor | 93.0  | 0.28  | 86.3  | 0.01  | 108.3 | 0.42  | 92.4  | -0.01 |
| <b>Digoxin</b>                           | 20830-75-5   | free base     | Sodium Channel                | 40.0  | -1.97 | 15.9  | -2.55 | 22.6  | -3.22 | 16.0  | -2.43 |
| <b>Dinaciclib (SCH727965)</b>            | 779353-01-4  | free base     | CDK                           | 51.5  | -1.48 | 24.7  | -2.23 | 26.3  | -3.07 | 14.6  | -2.48 |
| <b>Diphenamil Methylsulfate</b>          | 62-97-5      | methylsulfate | AChR                          | 92.6  | 0.26  | 50.3  | -1.30 | 102.1 | 0.16  | 123.8 | 0.98  |
| <b>Diphenidol HCl</b>                    | 3254-89-5    | Salt          | AChR                          | 88.3  | 0.08  | 68.3  | -0.64 | 90.1  | -0.36 | 106.2 | 0.42  |
| <b>Divalproex Sodium</b>                 | 76584-70-8   | sodium        | Autophagy                     | 98.9  | 0.53  | 110.1 | 0.88  | 102.9 | 0.19  | 93.1  | 0.01  |
| <b>DMH1</b>                              | 1206711-16-1 | free base     | BMP                           | 85.5  | -0.04 | 69.4  | -0.61 |       |       | 135.1 | 1.34  |
| <b>DMXAA (Vadimezan)</b>                 | 117570-53-3  | free base     | VDA                           | 96.5  | 0.43  | 115.0 | 1.05  | 104.9 | 0.27  | 81.6  | -0.35 |
| <b>Dolutegravir (GSK1349572)</b>         | 1051375-16-6 | free base     | Integrase                     | 75.6  | -0.46 | 112.7 | 0.97  | 124.0 | 1.08  | 121.6 | 0.91  |
| <b>Domperidone</b>                       | 57808-66-9   | free base     | Dopamine Receptor             | 113.9 | 1.16  | 116.4 | 1.11  | 123.8 | 1.08  | 116.1 | 0.74  |
| <b>Dopamine HCl</b>                      | 62-31-7      | hydrochloride | Dopamine Receptor             | 100.8 | 0.61  | 59.3  | -0.97 | 118.0 | 0.83  | 124.2 | 0.99  |
| <b>Dovitinib (TKI-258) Dilactic Acid</b> | 852433-84-2  | dilactic Acid | PDGFR,FGFR,c-Kit,FLT3,VEGFR   | 52.4  | -1.44 | 57.8  | -1.02 | 95.1  | -0.14 | 17.9  | -2.37 |
| <b>Dovitinib (TKI-258, CHIR-258)</b>     | 405169-16-6  | citrate       | FGFR,FLT3,c-Kit,VEGFR,PDGFR   | 66.7  | -0.84 | 83.4  | -0.10 | 87.0  | -0.49 | 110.8 | 0.57  |
| <b>Doxazosin Mesylate</b>                | 77883-43-3   | mesylate      | Adrenergic Receptor           | 78.9  | -0.32 | 53.0  | -1.20 | 115.1 | 0.71  | 105.9 | 0.41  |

|                                        |              |               |                                     |       |       |       |       |       |       |       |       |
|----------------------------------------|--------------|---------------|-------------------------------------|-------|-------|-------|-------|-------|-------|-------|-------|
| <b>Doxorubicin (Adriamycin)</b>        | 25316-40-9   | hydrochloride | Autophagy,Topoisomerase             | 10.7  | -3.21 | 44.5  | -1.51 | 71.7  | -1.14 | 4.4   | -2.80 |
| <b>Doxycycline HCl</b>                 | 10592-13-9   | hydrochloride | MMP,Others                          | 90.9  | 0.19  | 107.9 | 0.80  | 83.3  | -0.64 | 120.5 | 0.88  |
| <b>Drospirenone</b>                    | 67392-87-4   | free base     | Estrogen/progestogen Receptor       | 103.4 | 0.72  | 115.5 | 1.07  | 100.0 | 0.07  | 85.4  | -0.24 |
| <b>Droxinostat</b>                     | 99873-43-5   | free base     | HDAC                                | 103.9 | 0.74  | 114.0 | 1.02  | 110.1 | 0.49  | 98.0  | 0.16  |
| <b>Duloxetine HCl</b>                  | 136434-34-9  | hydrochloride | 5-HT Receptor                       | 103.5 | 0.72  | 112.3 | 0.96  | 95.2  | -0.14 | 97.0  | 0.13  |
| <b>Dutasteride</b>                     | 164656-23-9  | free base     | 5-alpha Reductase                   | 97.6  | 0.47  | 89.3  | 0.12  | 107.9 | 0.40  | 95.8  | 0.10  |
| <b>Dynasore</b>                        | 304448-55-3  | free base     | Dynamain                            | 73.6  | -0.54 | 65.1  | -0.76 | 76.7  | -0.92 | 88.1  | -0.15 |
| <b>Dyphylline</b>                      | 479-18-5     | free base     | PDE                                 | 98.8  | 0.53  | 116.6 | 1.11  | 111.6 | 0.56  | 79.3  | -0.43 |
| <b>E-64</b>                            | 66701-25-5   | free base     | Cathepsin K                         | 85.2  | -0.05 | 65.2  | -0.75 | 100.8 | 0.10  | 131.3 | 1.22  |
| <b>Edoxaban</b>                        | 480449-70-5  | free base     | Factor Xa                           | 154.8 | 2.90  | 107.2 | 0.77  | 107.8 | 0.40  | 94.1  | 0.04  |
| <b>EHop-016</b>                        | 1380432-32-5 | free base     | Rac                                 | 100.0 | 0.57  | 115.1 | 1.06  | 104.6 | 0.26  | 84.4  | -0.27 |
| <b>EHT 1864</b>                        | 754240-09-0  | Salt          | Rho                                 | 84.1  | -0.10 | 95.6  | 0.35  | 107.4 | 0.38  | 67.4  | -0.81 |
| <b>Elesclomol (STA-4783)</b>           | 488832-69-5  | free base     | HSP (e.g. HSP90)                    | 96.8  | 0.44  | 117.1 | 1.13  | 89.3  | -0.39 | 71.0  | -0.69 |
| <b>Eletriptan HBr</b>                  | 177834-92-3  | HBr           | 5-HT Receptor                       | 92.6  | 0.26  | 117.8 | 1.16  | 114.7 | 0.69  | 101.3 | 0.27  |
| <b>Elvitegravir (GS-9137, JTK-303)</b> | 697761-98-1  | free base     | Integrase                           | 94.5  | 0.34  | 116.3 | 1.10  | 106.1 | 0.32  | 105.3 | 0.39  |
| <b>Embelin</b>                         | 550-24-3     | free base     | IAP                                 | 100.4 | 0.59  | 116.5 | 1.11  | 89.4  | -0.39 | 129.0 | 1.15  |
| <b>Empagliflozin (BI 10773)</b>        | 864070-44-0  | free base     | SGLT                                | 91.9  | 0.23  | 70.7  | -0.56 | 108.0 | 0.40  | 96.7  | 0.12  |
| <b>Emtricitabine</b>                   | 143491-57-0  | free base     | Reverse Transcriptase               | 97.0  | 0.45  | 114.5 | 1.03  | 87.3  | -0.47 | 91.7  | -0.03 |
| <b>Enalapril Maleate</b>               | 76095-16-4   | maleate       | RAAS                                | 93.6  | 0.30  | 113.1 | 0.98  | 103.5 | 0.22  | 92.2  | -0.02 |
| <b>Enalaprilat Dihydrate</b>           | 84680-54-6   | dihydrate     | RAAS                                | 85.0  | -0.06 | 115.0 | 1.05  | 87.3  | -0.47 | 93.5  | 0.02  |
| <b>ENMD-2076</b>                       | 934353-76-1  | tartaric acid | Aurora Kinase,FLT3,VEGFR            | 62.2  | -1.02 | 100.2 | 0.52  | 71.5  | -1.14 | 81.1  | -0.37 |
| <b>Entacapone</b>                      | 130929-57-6  | free base     | Histone Methyltransferase           | 94.8  | 0.36  | 84.9  | -0.04 | 91.7  | -0.29 | 123.3 | 0.96  |
| <b>Entinostat (MS-275)</b>             | 209783-80-2  | free base     | HDAC                                | 50.1  | -1.54 | 94.5  | 0.31  | 106.0 | 0.32  | 2.1   | -2.87 |
| <b>Enzalutamide (MDV3100)</b>          | 915087-33-1  | free base     | Androgen Receptor                   | 98.7  | 0.52  | 93.0  | 0.26  | 113.5 | 0.64  | 65.0  | -0.88 |
| <b>Enzastaurin (LY317615)</b>          | 170364-57-5  | free base     | PKC                                 | 71.3  | -0.64 | 74.7  | -0.41 | 72.3  | -1.11 | 119.5 | 0.85  |
| <b>Epiandrosterone</b>                 | 481-29-8     | free base     | Androgen Receptor,Estrogen Receptor | 85.1  | -0.06 | 113.6 | 1.00  | 106.3 | 0.33  | 113.2 | 0.64  |
| <b>Epinephrine Bitartrate</b>          | 51-42-3      | bitartrate    | Adrenergic Receptor                 | 88.5  | 0.09  | 106.4 | 0.74  | 127.0 | 1.21  | 99.4  | 0.21  |
| <b>Epinephrine HCl</b>                 | 55-31-2      | hydrochloride | Adrenergic Receptor                 | 84.7  | -0.07 | 58.8  | -0.99 | 115.4 | 0.72  | 111.6 | 0.60  |

|                                |              |               |                               |       |       |       |       |       |       |       |       |
|--------------------------------|--------------|---------------|-------------------------------|-------|-------|-------|-------|-------|-------|-------|-------|
| <b>Epirubicin HCl</b>          | 56390-09-1   | hydrochloride | Topoisomerase                 | 15.6  | -3.00 | 53.5  | -1.18 | 67.3  | -1.32 | 3.5   | -2.83 |
| <b>EPZ004777</b>               | 1338466-77-5 | free base     | Histone Methyltransferase     | 79.6  | -0.29 | 67.9  | -0.66 | 110.6 | 0.52  | 69.6  | -0.73 |
| <b>EPZ5676</b>                 | 1380288-87-8 | free base     | Histone Methyltransferase     | 103.6 | 0.73  | 73.8  | -0.44 | 99.4  | 0.04  | 88.4  | -0.14 |
| <b>EPZ-6438</b>                | 1403254-99-8 | free base     | Histone Methyltransferase     | 67.6  | -0.80 | 113.8 | 1.01  |       |       | 82.2  | -0.34 |
| <b>Equol</b>                   | 531-95-3     | free base     | Estrogen/progestogen Receptor | 117.9 | 1.33  | 93.7  | 0.28  | 97.8  | -0.03 | 110.4 | 0.56  |
| <b>Erastin</b>                 | 571203-78-6  | free base     | Ferroptosis                   | 159.8 | 3.11  | 90.0  | 0.15  |       |       | 93.3  | 0.02  |
| <b>Erlotinib HCl (OSI-744)</b> | 183319-69-9  | hydrochloride | Autophagy,EGFR                | 86.6  | 0.01  | 68.4  | -0.64 | 92.8  | -0.24 | 114.0 | 0.67  |
| <b>Escitalopram Oxalate</b>    | 219861-08-2  | oxalate       | 5-HT Receptor                 | 80.2  | -0.26 | 117.2 | 1.13  | 106.7 | 0.35  | 128.9 | 1.14  |
| <b>ESI-09</b>                  | 263707-16-0  | free base     | Others                        | 107.3 | 0.88  | 92.8  | 0.25  | 105.7 | 0.31  | 83.2  | -0.31 |
| <b>Esomeprazole Sodium</b>     | 161796-78-7  | free base     | ATPase                        | 108.8 | 0.95  | 115.1 | 1.06  | 88.1  | -0.44 | 118.9 | 0.83  |
| <b>Estradiol Benzoate</b>      | 50-50-0      | free base     | Others                        | 132.1 | 1.93  | 116.2 | 1.10  | 106.6 | 0.35  | 42.1  | -1.61 |
| <b>Estradiol Cypionate</b>     | 313-06-4     | free base     | Estrogen/progestogen          | 88.4  | 0.08  | 117.5 | 1.14  | 107.7 | 0.39  | 158.2 | 2.07  |
| <b>Estradiol valerate</b>      | 979-32-8     | free base     | Estrogen/progestogen Receptor | 96.3  | 0.42  | 97.6  | 0.42  | 111.2 | 0.54  | 87.8  | -0.16 |
| <b>Estriol</b>                 | 50-27-1      | free base     | Estrogen/progestogen Receptor | 81.3  | -0.21 | 117.5 | 1.14  | 123.6 | 1.07  | 108.4 | 0.49  |
| <b>Estrone</b>                 | 53-16-7      | free base     | Estrogen/progestogen Receptor | 98.8  | 0.53  | 114.2 | 1.03  | 96.9  | -0.07 | 90.9  | -0.06 |
| <b>Ethinodiol diacetate</b>    | 297-76-7     | free base     | Estrogen/progestogen Receptor | 115.5 | 1.23  | 115.4 | 1.07  | 110.4 | 0.51  | 126.6 | 1.07  |
| <b>Etizolam</b>                | 40054-69-1   | free base     | Others                        | 104.3 | 0.76  | 118.3 | 1.17  | 100.0 | 0.07  | 122.0 | 0.92  |
| <b>Etodolac</b>                | 41340-25-4   | free base     | COX                           | 95.8  | 0.40  | 52.3  | -1.22 | 138.3 | 1.69  | 77.3  | -0.49 |
| <b>Etomidate</b>               | 33125-97-2   | free base     | GABA Receptor                 | 99.9  | 0.57  | 66.9  | -0.69 | 115.6 | 0.73  | 99.7  | 0.22  |
| <b>Etoposide</b>               | 33419-42-0   | free base     | Topoisomerase                 | 75.9  | -0.45 | 69.7  | -0.59 | 89.7  | -0.37 | 11.8  | -2.57 |
| <b>ETP-46464</b>               | 1345675-02-6 | free base     | mTOR,ATM/ATR                  | 61.8  | -1.04 | 57.3  | -1.04 | 87.8  | -0.45 | 75.1  | -0.56 |
| <b>Etravirine (TMC125)</b>     | 269055-15-4  | free base     | Reverse Transcriptase         | 119.7 | 1.41  | 115.3 | 1.07  | 115.0 | 0.70  | 98.3  | 0.17  |
| <b>EUK 134</b>                 | 81065-76-1   | free base     | Beta Amyloid                  | 64.8  | -0.92 | 114.7 | 1.04  | 83.8  | -0.62 | 104.4 | 0.37  |
| <b>Evacetrapib (LY2484595)</b> | 1186486-62-3 | free base     | CETP                          | 81.9  | -0.19 | 70.3  | -0.57 | 106.9 | 0.36  | 78.2  | -0.46 |
| <b>Everolimus (RAD001)</b>     | 159351-69-6  | free base     | mTOR                          | 90.1  | 0.15  | 84.0  | -0.07 | 64.7  | -1.44 | 64.2  | -0.91 |
| <b>EX 527 (Selisistat)</b>     | 49843-98-3   | free base     | Sirtuin                       | 89.0  | 0.11  | 51.4  | -1.26 | 105.4 | 0.29  | 94.9  | 0.07  |
| <b>Exemestane</b>              | 107868-30-4  | free base     | Aromatase                     | 96.5  | 0.43  | 102.2 | 0.59  | 120.5 | 0.94  | 94.7  | 0.06  |

|                                |              |               |                      |       |       |       |       |       |       |       |       |
|--------------------------------|--------------|---------------|----------------------|-------|-------|-------|-------|-------|-------|-------|-------|
| <b>Famotidine</b>              | 76824-35-6   | free base     | Histamine Receptor   | 98.1  | 0.50  | 116.0 | 1.09  | 103.3 | 0.20  | 99.6  | 0.22  |
| <b>Fasudil (HA-1077) HCl</b>   | 105628-07-7  | hydrochloride | ROCK, Autophagy      | 161.3 | 3.17  | 116.0 | 1.09  | 109.0 | 0.45  | 98.1  | 0.17  |
| <b>Felodipine</b>              | 72509-76-3   | free base     | Calcium Channel      | 93.3  | 0.29  | 71.1  | -0.54 | 106.8 | 0.35  | 149.7 | 1.80  |
| <b>Ferrostatin-1 (Fer-1)</b>   | 347174-05-4  | free base     | Ferroptosis          | 72.9  | -0.57 | 112.9 | 0.98  |       |       | 111.6 | 0.59  |
| <b>Fesoterodine Fumarate</b>   | 286930-03-8  | fumarate      | AChR                 | 108.6 | 0.94  | 59.9  | -0.95 | 90.8  | -0.32 | 80.9  | -0.38 |
| <b>Fexofenadine HCl</b>        | 153439-40-8  | hydrochloride | Histamine Receptor   | 87.6  | 0.05  | 116.9 | 1.12  | 108.6 | 0.43  | 94.9  | 0.07  |
| <b>FG-4592</b>                 | 808118-40-3  | free base     | HIF                  | 111.8 | 1.08  | 105.4 | 0.71  | 92.0  | -0.27 | 111.0 | 0.58  |
| <b>FH535</b>                   | 108409-83-2  | free base     | Wnt/beta-catenin     | 103.7 | 0.73  | 114.7 | 1.04  | 100.8 | 0.10  | 87.9  | -0.16 |
| <b>Filgotinib (GLPG0634)</b>   | 1206161-97-8 | free base     | JAK                  | 69.6  | -0.71 | 64.0  | -0.80 | 83.3  | -0.64 | 123.8 | 0.98  |
| <b>Finasteride</b>             | 98319-26-7   | free base     | 5-alpha Reductase    | 84.5  | -0.08 | 106.1 | 0.73  | 118.3 | 0.84  | 64.4  | -0.90 |
| <b>Fingolimod (FTY720) HCl</b> | 162359-56-0  | hydrochloride | S1P Receptor         | 75.2  | -0.47 | 86.3  | 0.01  | 78.5  | -0.85 | 128.8 | 1.14  |
| <b>Flavopiridol HCl</b>        | 131740-09-5  | hydrochloride | CDK                  | 54.1  | -1.37 | 20.7  | -2.37 | 31.6  | -2.84 | 21.8  | -2.25 |
| <b>Flavoxate HCl</b>           | 3717-88-2    | hydrochloride | AChR                 | 91.5  | 0.21  | 96.9  | 0.40  | 96.6  | -0.08 | 121.7 | 0.92  |
| <b>FLI-06</b>                  | 313967-18-9  | free base     | Notch                | 82.8  | -0.15 | 116.7 | 1.12  | 110.4 | 0.51  | 99.9  | 0.23  |
| <b>Flumazenil</b>              | 78755-81-4   | free base     | GABA Receptor        | 78.2  | -0.35 | 114.6 | 1.04  | 111.4 | 0.55  | 95.4  | 0.08  |
| <b>Flumequine</b>              | 42835-25-6   | free base     | Topoisomerase        | 114.1 | 1.17  | 114.8 | 1.05  | 117.2 | 0.79  | 142.0 | 1.56  |
| <b>Flunarizine 2HCl</b>        | 30484-77-6   | 2HCl          | Calcium Channel      | 97.3  | 0.46  | 115.5 | 1.07  | 105.6 | 0.30  | 131.4 | 1.22  |
| <b>Flunixin Meglumine</b>      | 42461-84-7   | meglumine     | COX                  | 102.2 | 0.67  | 109.9 | 0.87  | 91.9  | -0.28 | 95.6  | 0.09  |
| <b>Fluoxetine HCl</b>          | 56296-78-7   | hydrochloride | 5-HT Receptor        | 86.0  | -0.02 | 116.0 | 1.09  | 92.8  | -0.24 | 70.1  | -0.72 |
| <b>Flutamide</b>               | 13311-84-7   | free base     | Androgen Receptor    | 100.2 | 0.58  | 117.1 | 1.13  | 82.9  | -0.66 | 127.8 | 1.11  |
| <b>Fluvastatin Sodium</b>      | 93957-55-2   | sodium        | HMG-CoA Reductase    | 101.3 | 0.63  | 116.7 | 1.11  | 102.9 | 0.19  | 86.7  | -0.19 |
| <b>Fluvoxamine maleate</b>     | 61718-82-9   | maleate       | 5-HT Receptor        | 100.9 | 0.62  | 49.3  | -1.33 | 87.6  | -0.46 | 78.5  | -0.45 |
| <b>Foretinib (GSK1363089)</b>  | 849217-64-7  | free base     | VEGFR,c-Met          | 48.0  | -1.63 | 76.2  | -0.35 | 65.5  | -1.40 | 67.1  | -0.81 |
| <b>Formestane</b>              | 566-48-3     | free base     | Aromatase            | 117.1 | 1.30  | 94.9  | 0.32  | 90.6  | -0.33 | 88.1  | -0.15 |
| <b>Formoterol Hemifumarate</b> | 43229-80-7   | fumarate      | Adrenergic Receptor  | 106.2 | 0.84  | 115.7 | 1.08  | 109.5 | 0.47  | 91.5  | -0.04 |
| <b>Forskolin</b>               | 66575-29-9   | free base     | cAMP                 | 123.6 | 1.58  | 90.9  | 0.18  | 90.7  | -0.33 | 128.0 | 1.12  |
| <b>Fostamatinib (R788)</b>     | 901119-35-5  | free base     | Syk                  | 68.1  | -0.78 | 57.2  | -1.05 | 108.5 | 0.43  | 92.9  | 0.00  |
| <b>FPH2 (BRD-9424)</b>         | 957485-64-2  | free base     | Others               | 84.1  | -0.10 | 96.6  | 0.39  | 104.0 | 0.23  | 83.2  | -0.30 |
| <b>Fulvestrant</b>             | 129453-61-8  | free base     | Estrogen/progestogen | 108.2 | 0.92  | 83.2  | -0.10 | 128.1 | 1.26  | 103.1 | 0.32  |



|                               |              |             | Receptor                            |       |       |       |       |       |       |       |       |
|-------------------------------|--------------|-------------|-------------------------------------|-------|-------|-------|-------|-------|-------|-------|-------|
| <b>Gabexate Mesylate</b>      | 56974-61-9   | mesylate    | Proteasome                          | 101.1 | 0.62  | 115.6 | 1.08  | 93.5  | -0.21 | 98.7  | 0.19  |
| <b>Galeterone</b>             | 851983-85-2  | free base   | P450 (e.g. CYP17),Androgen Receptor | 94.8  | 0.36  | 65.1  | -0.76 | 104.6 | 0.26  | 118.4 | 0.81  |
| <b>Gallamine Triethiodide</b> | 65-29-2      | Iodine salt | AChR                                | 90.8  | 0.19  | 116.9 | 1.12  | 113.6 | 0.64  | 101.8 | 0.28  |
| <b>Ganetespib (STA-9090)</b>  | 888216-25-9  | free base   | HSP (e.g. HSP90)                    | 57.0  | -1.25 | 31.9  | -1.97 | 49.4  | -2.09 | 39.6  | -1.69 |
| <b>GDC-0068</b>               | 1001264-89-6 | free base   | Akt                                 | 64.6  | -0.92 | 110.2 | 0.88  | 89.5  | -0.38 | 106.0 | 0.42  |
| <b>GDC-0152</b>               | 873652-48-3  | free base   | IAP                                 | 85.7  | -0.03 | 115.4 | 1.07  | 82.9  | -0.66 | 115.8 | 0.73  |
| <b>GDC-0349</b>               | 1207360-89-1 | free base   | mTOR                                | 54.1  | -1.37 | 101.1 | 0.55  | 65.3  | -1.41 | 105.7 | 0.41  |
| <b>GDC-0879</b>               | 905281-76-7  | free base   | Raf                                 | 121.1 | 1.47  | 115.1 | 1.06  | 151.1 | 2.24  | 98.3  | 0.17  |
| <b>GDC-0941</b>               | 957054-30-7  | free base   | PI3K                                | 57.3  | -1.24 | 84.1  | -0.07 | 74.1  | -1.03 | 83.3  | -0.30 |
| <b>GDC-0980 (RG7422)</b>      | 1032754-93-0 | free base   | mTOR,PI3K                           | 55.6  | -1.31 | 43.7  | -1.54 | 78.7  | -0.84 | 76.6  | -0.51 |
| <b>Gefitinib (ZD1839)</b>     | 184475-35-2  | free base   | EGFR                                | 86.6  | 0.01  | 116.5 | 1.11  | 96.6  | -0.08 | 118.1 | 0.80  |
| <b>Geldanamycin</b>           | 30562-34-6   | free base   | HSP (e.g. HSP90),Autophagy          | 37.4  | -2.08 | 38.8  | -1.72 | 49.0  | -2.10 | 41.5  | -1.63 |
| <b>Gemcitabine</b>            | 95058-81-4   | free base   | Autophagy,DNA/RNA Synthesis         | 75.6  | -0.46 | 81.8  | -0.15 | 65.2  | -1.41 | 16.5  | -2.42 |
| <b>Genistein</b>              | 446-72-0     | free base   | Topoisomerase,EGFR                  | 83.2  | -0.14 | 116.5 | 1.11  | 125.8 | 1.16  | 68.8  | -0.76 |
| <b>Gestodene</b>              | 60282-87-3   | free base   | Estrogen/progestogen Receptor       | 88.1  | 0.07  | 55.9  | -1.09 | 92.8  | -0.24 | 68.4  | -0.77 |
| <b>GF109203X</b>              | 133052-90-1  | free base   | PKC                                 | 67.5  | -0.80 | 74.6  | -0.41 |       |       | 91.7  | -0.04 |
| <b>Gimeracil</b>              | 103766-25-2  | free base   | Dehydrogenase                       | 98.3  | 0.50  | 115.9 | 1.09  | 85.8  | -0.54 | 95.1  | 0.07  |
| <b>Ginkgolide A</b>           | 15291-75-5   | free base   | GABA Receptor                       | 100.2 | 0.58  | 116.1 | 1.09  | 103.2 | 0.20  | 89.4  | -0.11 |
| <b>Ginkgolide B</b>           | 15291-77-7   | free base   | PAFR                                | 99.3  | 0.55  | 116.8 | 1.12  | 106.7 | 0.35  | 98.4  | 0.18  |
| <b>Givinostat (ITF2357)</b>   | 732302-99-7  | chloride    | HDAC                                | 44.6  | -1.77 | 37.8  | -1.75 | 46.5  | -2.21 | -0.4  | -2.95 |
| <b>Gliclazide</b>             | 21187-98-4   | free base   | Potassium Channel                   | 83.2  | -0.14 | 69.3  | -0.61 | 97.5  | -0.04 | 109.7 | 0.54  |
| <b>Glimepiride</b>            | 93479-97-1   | free base   | DPP-4                               | 86.3  | -0.01 | 96.2  | 0.37  | 134.3 | 1.52  | 104.4 | 0.37  |
| <b>Gliquidone</b>             | 33342-05-1   | free base   | Potassium Channel                   | 98.3  | 0.50  | 80.1  | -0.22 | 112.1 | 0.58  | 130.5 | 1.19  |
| <b>GNE-0877</b>               | 1374828-69-9 | free base   | LRRK2                               | 83.9  | -0.10 | 116.0 | 1.09  | 98.1  | -0.02 | 142.0 | 1.56  |
| <b>GNE-7915</b>               | 1351761-44-8 | free base   | LRRK2                               | 109.4 | 0.97  | 54.5  | -1.14 | 98.9  | 0.02  | 76.2  | -0.53 |
| <b>GNE-9605</b>               | 1536200-31-3 | free base   | LRRK2                               | 82.2  | -0.18 | 111.2 | 0.92  | 115.4 | 0.72  | 78.2  | -0.46 |

|                            |              |               |                      |       |       |       |       |       |       |       |       |
|----------------------------|--------------|---------------|----------------------|-------|-------|-------|-------|-------|-------|-------|-------|
| <b>GNF-2</b>               | 778270-11-4  | free base     | Bcr-Abl              | 82.0  | -0.19 | 49.4  | -1.33 | 102.7 | 0.18  | 98.1  | 0.17  |
| <b>GNF-5</b>               | 778277-15-9  | free base     | Bcr-Abl              | 85.4  | -0.04 | 60.7  | -0.92 | 72.4  | -1.11 | 82.8  | -0.32 |
| <b>Go 6983</b>             | 133053-19-7  | free base     | PKC                  | 71.2  | -0.64 | 44.4  | -1.51 | 79.8  | -0.79 | 98.0  | 0.16  |
| <b>Golgicide A</b>         | 1139889-93-2 | free base     | ATPase               | 86.6  | 0.01  | 117.1 | 1.13  | 93.6  | -0.21 | 101.1 | 0.26  |
| <b>Golvatinib (E7050)</b>  | 928037-13-2  | free base     | VEGFR,c-Met          | 72.6  | -0.59 | 65.1  | -0.76 | 115.9 | 0.74  | 95.1  | 0.07  |
| <b>GS-9973</b>             | 1229208-44-9 | free base     | Syk                  | 95.3  | 0.38  | 78.9  | -0.26 | 110.7 | 0.52  | 121.6 | 0.91  |
| <b>GSK J4 HCl</b>          | 1373423-53-0 | hydrochloride | Histone demethylases | 102.2 | 0.67  | 89.1  | 0.11  | 80.0  | -0.78 | 43.6  | -1.56 |
| <b>GSK1059615</b>          | 958852-01-2  | free base     | PI3K,mTOR            | 45.2  | -1.75 | 47.8  | -1.39 | 81.7  | -0.71 | 42.0  | -1.61 |
| <b>GSK1292263</b>          | 1032823-75-8 | free base     | GPR                  | 108.6 | 0.94  | 96.1  | 0.37  | 95.1  | -0.14 | 110.1 | 0.55  |
| <b>GSK1838705A</b>         | 1116235-97-2 | free base     | IGF-1R,ALK           | 42.4  | -1.86 | 48.3  | -1.37 | 91.2  | -0.31 | 96.4  | 0.11  |
| <b>GSK1904529A</b>         | 1089283-49-7 | free base     | IGF-1R               | 90.2  | 0.16  | 62.8  | -0.84 | 81.6  | -0.72 | 127.7 | 1.10  |
| <b>GSK2126458 (GSK458)</b> | 1086062-66-9 | free base     | PI3K,mTOR            | 33.2  | -2.26 | 32.1  | -1.96 | 55.3  | -1.83 | 14.7  | -2.47 |
| <b>GSK2334470</b>          | 1227911-45-6 | free base     | PDK-1                | 75.9  | -0.44 | 99.4  | 0.49  |       |       | 75.4  | -0.55 |
| <b>GSK256066</b>           | 801312-28-7  | free base     | PDE                  | 93.1  | 0.28  | 46.8  | -1.43 | 133.9 | 1.50  | 94.0  | 0.04  |
| <b>GSK2606414</b>          | 1337531-36-8 | free base     | PERK                 | 77.4  | -0.38 | 63.8  | -0.81 | 101.3 | 0.12  | 75.4  | -0.55 |
| <b>GSK2636771</b>          | 1372540-25-4 | free base     | PI3K                 | 81.9  | -0.19 | 73.7  | -0.45 | 102.9 | 0.19  | 77.8  | -0.47 |
| <b>GSK2656157</b>          | 1337532-29-2 | free base     | PERK                 | 81.2  | -0.22 | 65.5  | -0.75 | 75.6  | -0.97 | 113.0 | 0.64  |
| <b>GSK2656157</b>          | 1337532-29-2 | free base     | PERK                 | 73.6  | -0.54 | 87.7  | 0.06  | 80.2  | -0.78 | 116.5 | 0.75  |
| <b>GSK3787</b>             | 188591-46-0  | free base     | PPAR                 | 88.0  | 0.07  | 110.5 | 0.89  | 105.8 | 0.31  | 75.0  | -0.57 |
| <b>GSK429286A</b>          | 864082-47-3  | free base     | ROCK                 | 117.0 | 1.30  | 106.4 | 0.74  | 112.9 | 0.61  | 86.7  | -0.19 |
| <b>GSK461364</b>           | 929095-18-1  | free base     | PLK                  | 76.3  | -0.43 | 49.7  | -1.32 | 58.9  | -1.68 | 45.2  | -1.51 |
| <b>GSK690693</b>           | 937174-76-0  | free base     | Akt                  | 71.1  | -0.65 | 111.2 | 0.92  | 89.8  | -0.37 | 120.1 | 0.86  |
| <b>GSK923295</b>           | 1088965-37-0 | free base     | Kinesin              | 68.2  | -0.77 | 85.4  | -0.02 |       |       | 72.8  | -0.63 |
| <b>Guanabenz Acetate</b>   | 23256-50-0   | acetate       | Adrenergic Receptor  | 82.0  | -0.19 | 117.0 | 1.13  | 113.1 | 0.62  | 119.0 | 0.83  |
| <b>GW0742</b>              | 317318-84-6  | free base     | PPAR                 | 71.8  | -0.62 | 66.5  | -0.71 | 112.1 | 0.58  | 156.2 | 2.01  |
| <b>GW2580</b>              | 870483-87-7  | free base     | CSF-1R               | 82.1  | -0.18 | 83.9  | -0.08 | 100.8 | 0.10  | 84.6  | -0.26 |
| <b>GW3965 HCl</b>          | 405911-17-3  | hydrochloride | Liver X Receptor     | 80.6  | -0.24 | 92.5  | 0.24  | 117.0 | 0.79  | 108.8 | 0.51  |
| <b>GW4064</b>              | 278779-30-9  | free base     | FXR                  | 90.0  | 0.15  | 115.5 | 1.07  | 115.1 | 0.71  | 118.5 | 0.81  |
| <b>GW5074</b>              | 220904-83-6  | free base     | Raf                  | 93.3  | 0.29  | 90.0  | 0.15  | 113.6 | 0.64  | 99.7  | 0.22  |

|                                  |              |               |                                  |       |       |       |       |       |       |       |       |
|----------------------------------|--------------|---------------|----------------------------------|-------|-------|-------|-------|-------|-------|-------|-------|
| <b>GW788388</b>                  | 452342-67-5  | free base     | TGF-beta/Smad                    | 82.0  | -0.19 | 114.6 | 1.04  | 135.8 | 1.59  | 104.9 | 0.38  |
| <b>GW842166X</b>                 | 666260-75-9  | free base     | Cannabinoid Receptor             | 92.7  | 0.27  | 114.5 | 1.04  | 117.5 | 0.81  | 119.7 | 0.85  |
| <b>GW9508</b>                    | 885101-89-3  | free base     | GPR                              | 83.5  | -0.12 | 64.4  | -0.78 | 79.6  | -0.80 | 142.9 | 1.59  |
| <b>GW9662</b>                    | 22978-25-2   | free base     | PPAR                             | 86.1  | -0.01 | 70.2  | -0.57 | 108.6 | 0.43  | 107.7 | 0.47  |
| <b>GZD824</b>                    | 1421783-64-3 | mesylate      | Bcr-Abl                          | 57.5  | -1.22 | 66.9  | -0.70 |       |       | 106.8 | 0.44  |
| <b>H 89 2HCl</b>                 | 130964-39-5  | 2HCl          | PKA                              | 92.5  | 0.26  | 62.9  | -0.84 | 100.3 | 0.08  | 84.2  | -0.27 |
| <b>HA14-1</b>                    | 65673-63-4   | free base     | Bcl-2                            | 56.7  | -1.26 | 49.7  | -1.32 | 63.0  | -1.51 | 118.1 | 0.80  |
| <b>HER2-Inhibitor-1</b>          | 937265-83-3  | free base     | HER2,EGFR                        | 111.1 | 1.05  | 93.4  | 0.27  | 111.3 | 0.55  | 137.5 | 1.42  |
| <b>Hesperadin</b>                | 422513-13-1  | free base     | Aurora Kinase                    | 53.9  | -1.38 | 52.0  | -1.24 | 43.7  | -2.32 | 70.5  | -0.71 |
| <b>Hesperetin</b>                | 520-33-2     | free base     | Histamine Receptor,TGF-beta/Smad | 114.9 | 1.20  | 54.0  | -1.16 | 100.0 | 0.06  | 88.2  | -0.14 |
| <b>Hexestrol</b>                 | 84-16-2      | free base     | Estrogen/progestogen Receptor    | 97.2  | 0.46  | 117.3 | 1.14  | 124.3 | 1.10  | 129.9 | 1.17  |
| <b>Histamine 2HCl</b>            | 56-92-8      | hydrochloride | Histamine Receptor               | 91.9  | 0.23  | 81.8  | -0.15 | 82.3  | -0.69 | 90.2  | -0.08 |
| <b>HJC0350</b>                   | 885434-70-8  | free base     | Others                           | 106.0 | 0.83  | 97.7  | 0.43  | 102.0 | 0.15  | 105.5 | 0.40  |
| <b>HMN-214</b>                   | 173529-46-9  | free base     | PLK                              | 57.5  | -1.22 | 77.6  | -0.31 | 70.7  | -1.18 | 46.4  | -1.47 |
| <b>HO-3867</b>                   | 1172133-28-6 | free base     | STAT                             | 111.3 | 1.06  | 96.1  | 0.37  | 111.8 | 0.56  | 56.9  | -1.14 |
| <b>Homatropine Bromide</b>       | 51-56-9      | bromide       | AChR                             | 96.8  | 0.44  | 64.4  | -0.78 | 116.7 | 0.77  | 94.9  | 0.07  |
| <b>Homatropine Methylbromide</b> | 80-49-9      | Methylbromide | AChR                             | 88.3  | 0.08  | 89.5  | 0.13  | 107.8 | 0.40  | 128.1 | 1.12  |
| <b>Honokiol</b>                  | 35354-74-6   | free base     | MEK,Akt                          | 107.4 | 0.89  | 62.3  | -0.86 | 99.2  | 0.03  | 82.1  | -0.34 |
| <b>HS-173</b>                    | 1276110-06-5 | free base     | PI3K                             | 91.2  | 0.20  | 57.3  | -1.05 | 69.5  | -1.23 | 48.3  | -1.41 |
| <b>HSP990 (NVP-HSP990)</b>       | 934343-74-5  | free base     | HSP (e.g. HSP90)                 | 50.2  | -1.53 | 32.0  | -1.96 |       |       | 38.9  | -1.71 |
| <b>Hydroxyzine 2HCl</b>          | 2192-20-3    | hydrochloride | Histamine Receptor               | 112.8 | 1.12  | 115.0 | 1.06  | 115.5 | 0.72  | 94.9  | 0.06  |
| <b>Hyoscyamine</b>               | 101-31-5     | free base     | AChR                             | 88.1  | 0.07  | 112.9 | 0.98  | 102.4 | 0.17  | 119.2 | 0.84  |
| <b>I-BET151 (GSK1210151A)</b>    | 1300031-49-5 | free base     | Epigenetic Reader Domain         | 41.9  | -1.89 | 89.1  | 0.11  | 77.7  | -0.88 | 44.2  | -1.54 |
| <b>I-BET-762</b>                 | 1260907-17-2 | free base     | Epigenetic Reader Domain         | 51.0  | -1.50 | 55.0  | -1.13 |       |       | 43.6  | -1.56 |
| <b>Ibrutinib (PCI-32765)</b>     | 936563-96-1  | free base     | BTK                              | 79.4  | -0.30 | 47.2  | -1.41 | 117.8 | 0.82  | 117.7 | 0.79  |
| <b>Ibuprofen</b>                 | 15687-27-1   | free base     | COX                              | 124.3 | 1.61  | 81.4  | -0.17 | 108.2 | 0.41  | 78.6  | -0.45 |
| <b>Ibutilide Fumarate</b>        | 122647-32-9  | fumarate      | Sodium Channel                   | 150.6 | 2.72  | 110.7 | 0.90  | 98.4  | 0.00  | 105.0 | 0.38  |
| <b>Icariin</b>                   | 489-32-7     | free base     | PDE                              | 108.0 | 0.92  | 73.1  | -0.47 | 93.2  | -0.22 | 115.4 | 0.72  |

|                                     |              |                |                      |       |       |       |       |       |       |       |       |
|-------------------------------------|--------------|----------------|----------------------|-------|-------|-------|-------|-------|-------|-------|-------|
| <b>ICG-001</b>                      | 780757-88-2  | free base      | Wnt/beta-catenin     | 75.7  | -0.45 | 67.1  | -0.69 | 109.7 | 0.48  | 49.8  | -1.36 |
| <b>Icotinib</b>                     | 610798-31-7  | free base      | EGFR                 | 82.4  | -0.17 | 114.8 | 1.05  | 95.3  | -0.13 | 97.0  | 0.13  |
| <b>Idarubicin HCl</b>               | 57852-57-0   | hydrochloride  | Topoisomerase        | 4.8   | -3.46 | 4.9   | -2.95 | 23.3  | -3.19 | 2.1   | -2.87 |
| <b>IEM 1754 dihydrobroMide</b>      | 162831-31-4  | dihydrobroMide | GluR,5-HT Receptor   | 76.2  | -0.43 | 60.2  | -0.94 | 121.8 | 0.99  | 99.5  | 0.21  |
| <b>Ifenprodil Tartrate</b>          | 23210-58-4   | tartrate       | GluR                 | 103.4 | 0.72  | 115.8 | 1.08  | 104.8 | 0.27  | 117.4 | 0.78  |
| <b>IKK-16 (IKK Inhibitor VII)</b>   | 873225-46-8  | free base      | IkB/IKK              | 90.8  | 0.18  | 47.7  | -1.39 | 113.9 | 0.65  | 84.6  | -0.26 |
| <b>Ilomastat (GM6001, Galardin)</b> | 142880-36-2  | free base      | MMP                  | 80.9  | -0.23 | 113.5 | 1.00  |       |       | 86.9  | -0.19 |
| <b>IM-12</b>                        | 1129669-05-1 | free base      | GSK-3                | 81.4  | -0.21 | 70.6  | -0.56 | 101.0 | 0.11  | 112.3 | 0.62  |
| <b>Imatinib (STI571)</b>            | 152459-95-5  | free base      | PDGFR                | 88.9  | 0.10  | 52.2  | -1.23 | 156.4 | 2.46  | 116.2 | 0.74  |
| <b>Imatinib Mesylate (STI571)</b>   | 220127-57-1  | mesylate       | c-Kit,Bcr-Abl,PDGFR  | 91.2  | 0.20  | 116.9 | 1.12  | 102.5 | 0.17  | 121.2 | 0.90  |
| <b>IMD 0354</b>                     | 978-62-1     | free base      | IkB/IKK              | 65.7  | -0.88 | 57.2  | -1.05 | 113.1 | 0.62  | 77.8  | -0.47 |
| <b>Imidapril HCl</b>                | 89396-94-1   | free base      | RAAS                 | 126.9 | 1.72  | 114.3 | 1.03  | 94.5  | -0.17 | 122.2 | 0.93  |
| <b>INCB024360</b>                   | 914471-09-3  | free base      | IDO                  | 89.4  | 0.13  | 106.9 | 0.76  | 75.7  | -0.97 | 88.0  | -0.15 |
| <b>Indacaterol Maleate</b>          | 753498-25-8  | maleate        | Adrenergic Receptor  | 94.5  | 0.34  | 109.1 | 0.84  | 103.7 | 0.22  | 119.6 | 0.85  |
| <b>Indirubin</b>                    | 479-41-4     | free base      | GSK-3                | 104.9 | 0.78  | 72.8  | -0.48 | 89.7  | -0.37 | 102.3 | 0.30  |
| <b>INH1</b>                         | 313553-47-8  | free base      | Microtubule Associat | 101.3 | 0.63  | 79.2  | -0.25 | 87.3  | -0.47 | 100.7 | 0.25  |
| <b>INH6</b>                         | 1001753-24-7 | free base      | Microtubule Associat | 85.5  | -0.04 | 92.1  | 0.22  | 99.7  | 0.05  | 88.3  | -0.14 |
| <b>Iniparib (BSI-201)</b>           | 160003-66-7  | free base      | PARP                 | 92.9  | 0.28  | 101.2 | 0.55  | 94.7  | -0.16 | 92.2  | -0.02 |
| <b>INK 128 (MLN0128)</b>            | 1224844-38-5 | free base      | mTOR                 | 38.0  | -2.05 | 39.3  | -1.70 | 35.2  | -2.69 | 28.9  | -2.02 |
| <b>INO-1001</b>                     | 3544-24-9    | free base      | PARP                 | 108.9 | 0.95  | 117.4 | 1.14  | 111.7 | 0.56  | 92.6  | -0.01 |
| <b>IOWH032</b>                      | 1191252-49-9 | free base      | CFTR                 | 80.4  | -0.26 | 93.8  | 0.28  | 82.0  | -0.70 | 103.2 | 0.33  |
| <b>IOX1</b>                         | 5852-78-8    | free base      | Histone demethylases | 74.9  | -0.49 | 104.0 | 0.66  |       |       | 88.2  | -0.15 |
| <b>IOX2</b>                         | 931398-72-0  | free base      | HIF                  | 92.0  | 0.24  | 110.4 | 0.89  | 99.0  | 0.02  | 107.4 | 0.46  |
| <b>IPA-3</b>                        | 42521-82-4   | free base      | PAK                  | 84.1  | -0.10 | 75.8  | -0.37 |       |       | 80.1  | -0.40 |
| <b>IPI-145 (INK1197)</b>            | 1201438-56-3 | free base      | PI3K                 | 81.3  | -0.22 | 114.8 | 1.05  | 98.5  | 0.00  | 110.6 | 0.56  |
| <b>IPI-145 (INK1197)</b>            | 1201438-56-3 | free base      | PI3K                 | 89.3  | 0.12  | 100.2 | 0.52  | 91.8  | -0.28 | 111.5 | 0.59  |
| <b>Irinotecan</b>                   | 97682-44-5   | free base      | Topoisomerase        | 56.7  | -1.26 | 99.2  | 0.48  | 108.9 | 0.44  | 28.6  | -2.03 |
| <b>Irinotecan HCl Trihydrate</b>    | 136572-09-3  | hydrate        | Topoisomerase        | 66.3  | -0.85 | 49.1  | -1.34 | 93.8  | -0.20 | 77.8  | -0.48 |

|                                  |              |               |                     |       |       |       |       |       |       |       |       |
|----------------------------------|--------------|---------------|---------------------|-------|-------|-------|-------|-------|-------|-------|-------|
| <b>Irsogladine</b>               | 57381-26-7   | free base     | PDE,AChR            | 106.4 | 0.85  | 115.5 | 1.07  | 98.2  | -0.01 | 84.2  | -0.27 |
| <b>Isoprenaline HCl</b>          | 51-30-9      | hydrochloride | Adrenergic Receptor | 76.2  | -0.43 | 116.2 | 1.10  | 120.7 | 0.94  | 104.0 | 0.35  |
| <b>Isotretinoin</b>              | 4759-48-2    | free base     | Hydroxylase         | 91.2  | 0.20  | 63.4  | -0.82 | 121.2 | 0.96  | 93.1  | 0.01  |
| <b>Ispinesib (SB-715992)</b>     | 336113-53-2  | free base     | Kinesin             | 46.3  | -1.70 | 91.6  | 0.21  | 45.9  | -2.23 | 32.4  | -1.91 |
| <b>Isradipine</b>                | 75695-93-1   | free base     | Calcium Channel     | 87.6  | 0.05  | 115.5 | 1.07  | 110.7 | 0.52  | 73.6  | -0.61 |
| <b>IU1</b>                       | 314245-33-5  | free base     | DUB                 | 89.3  | 0.12  | 108.7 | 0.82  |       |       | 121.7 | 0.91  |
| <b>Ivabradine HCl</b>            | 148849-67-6  | hydrochloride | Adrenergic Receptor | 98.3  | 0.50  | 75.4  | -0.38 | 88.9  | -0.41 | 129.4 | 1.16  |
| <b>Ivacaftor (VX-770)</b>        | 873054-44-5  | free base     | CFTR                | 98.4  | 0.51  | 113.0 | 0.98  | 113.9 | 0.66  | 95.7  | 0.09  |
| <b>IWP-2</b>                     | 686770-61-6  | free base     | Wnt/beta-catenin    | 129.7 | 1.83  | 88.1  | 0.07  |       |       | 114.5 | 0.69  |
| <b>IWP-L6</b>                    | 1427782-89-5 | free base     | Wnt/beta-catenin    | 79.2  | -0.31 | 54.3  | -1.15 | 97.9  | -0.03 | 79.1  | -0.44 |
| <b>IWR-1-endo</b>                | 1127442-82-3 | free base     | Wnt/beta-catenin    | 106.0 | 0.83  | 100.2 | 0.52  |       |       | 113.7 | 0.66  |
| <b>JNJ-1661010</b>               | 681136-29-8  | free base     | FAAH                | 93.5  | 0.30  | 113.4 | 0.99  | 124.3 | 1.10  | 113.4 | 0.65  |
| <b>JNJ-26854165 (Serdemetan)</b> | 881202-45-5  | free base     | p53,E3 Ligase       | 105.6 | 0.81  | 108.5 | 0.82  | 130.6 | 1.36  | 86.7  | -0.19 |
| <b>JNJ-38877605</b>              | 943540-75-8  | free base     | c-Met               | 130.2 | 1.86  | 111.7 | 0.93  | 113.9 | 0.65  | 64.2  | -0.91 |
| <b>JNJ-7706621</b>               | 443797-96-4  | free base     | CDK,Aurora Kinase   | 71.9  | -0.62 | 74.2  | -0.43 | 82.9  | -0.66 | 56.0  | -1.17 |
| <b>JNJ-7777120</b>               | 459168-41-3  | free base     | Histamine Receptor  | 91.1  | 0.20  | 99.7  | 0.50  | 101.8 | 0.14  | 97.2  | 0.14  |
| <b>JNK Inhibitor IX</b>          | 312917-14-9  | free base     | JNK                 | 61.3  | -1.06 | 49.7  | -1.32 | 45.2  | -2.26 | 33.8  | -1.87 |
| <b>JNK-IN-8</b>                  | 1410880-22-6 | free base     | JNK                 | 91.8  | 0.23  | 71.2  | -0.54 | 79.7  | -0.80 | 120.4 | 0.87  |
| <b>JSH-23</b>                    | 749886-87-1  | free base     | NF-κB               | 80.6  | -0.25 | 102.8 | 0.61  | 99.6  | 0.05  | 115.5 | 0.72  |
| <b>JTC-801</b>                   | 244218-51-7  | hydrochloride | Opioid Receptor     | 83.8  | -0.11 | 61.3  | -0.90 | 124.1 | 1.09  | 135.7 | 1.36  |
| <b>K02288</b>                    | 1431985-92-0 | free base     | TGF-beta/Smad       | 74.2  | -0.52 | 116.4 | 1.11  | 125.4 | 1.15  | 79.8  | -0.41 |
| <b>Ketanserin</b>                | 74050-98-9   | free base     | 5-HT Receptor       | 116.3 | 1.27  | 106.9 | 0.76  | 96.5  | -0.09 | 84.9  | -0.25 |
| <b>Ketoconazole</b>              | 65277-42-1   | free base     | P450 (e.g. CYP17)   | 99.4  | 0.55  | 74.6  | -0.42 | 111.3 | 0.55  | 69.1  | -0.75 |
| <b>Ketoprofen</b>                | 22071-15-4   | free base     | COX                 | 83.2  | -0.14 | 115.3 | 1.06  | 99.5  | 0.04  | 78.8  | -0.44 |
| <b>Ketorolac</b>                 | 74103-07-4   | tromethamine  | COX                 | 84.3  | -0.09 | 115.1 | 1.06  | 89.4  | -0.39 | 94.0  | 0.04  |
| <b>Ketotifen Fumarate</b>        | 34580-14-8   | fumarate      | Histamine Receptor  | 98.9  | 0.53  | 115.4 | 1.07  | 101.3 | 0.12  | 147.0 | 1.72  |
| <b>Ki16198</b>                   | 355025-13-7  | free base     | LPA Receptor        | 101.2 | 0.63  | 73.0  | -0.47 | 97.5  | -0.04 | 94.9  | 0.07  |
| <b>Ki16425</b>                   | 355025-24-0  | free base     | LPA Receptor        | 93.8  | 0.31  | 55.9  | -1.09 | 104.7 | 0.27  | 89.1  | -0.12 |
| <b>Ki8751</b>                    | 228559-41-9  | free base     | PDGFR,c-Kit,VEGFR   | 71.3  | -0.64 | 50.8  | -1.28 | 53.3  | -1.92 | 35.0  | -1.83 |

|                                         |              |           |                              |       |       |       |       |       |       |       |       |
|-----------------------------------------|--------------|-----------|------------------------------|-------|-------|-------|-------|-------|-------|-------|-------|
| <b>KN-62</b>                            | 127191-97-3  | free base | Others                       | 121.2 | 1.47  | 105.8 | 0.72  | 105.2 | 0.29  | 103.3 | 0.33  |
| <b>KN-93 Phosphate</b>                  | 1188890-41-6 | free base | Others                       | 86.7  | 0.01  | 76.1  | -0.36 | 97.4  | -0.05 | 83.9  | -0.28 |
| <b>KPT-185</b>                          | 1333151-73-7 | free base | CRM1                         | 58.5  | -1.18 | 38.5  | -1.73 |       |       | 3.7   | -2.82 |
| <b>KPT-276</b>                          | 1421919-75-6 | free base | CRM1                         | 68.7  | -0.75 | 76.9  | -0.33 |       |       | 7.8   | -2.69 |
| <b>KPT-330</b>                          | 1393477-72-9 | free base | CRM1                         | 59.6  | -1.13 | 49.7  | -1.32 |       |       | 3.6   | -2.83 |
| <b>K-Ras(G12C) inhibitor 6</b>          | N/A          | free base | Ras                          | 105.9 | 0.83  | 116.9 | 1.12  | 100.5 | 0.08  | 84.3  | -0.27 |
| <b>K-Ras(G12C) inhibitor 9</b>          | 1469337-91-4 | free base | Rho                          | 116.1 | 1.26  | 88.8  | 0.10  | 109.7 | 0.48  | 99.6  | 0.21  |
| <b>KRN 633</b>                          | 286370-15-8  | free base | PDGFR,VEGFR                  | 80.4  | -0.26 | 116.0 | 1.09  | 133.5 | 1.49  | 97.8  | 0.16  |
| <b>KU-0063794</b>                       | 938440-64-3  | free base | mTOR                         | 70.6  | -0.67 | 96.5  | 0.38  | 94.0  | -0.19 | 59.1  | -1.07 |
| <b>KU-55933 (ATM Kinase Inhibitor)</b>  | 587871-26-9  | free base | ATM/ATR                      | 100.4 | 0.59  | 99.2  | 0.48  | 104.5 | 0.25  | 88.0  | -0.15 |
| <b>KU-60019</b>                         | 925701-49-1  | free base | ATM/ATR                      | 96.9  | 0.45  | 115.1 | 1.06  | 122.3 | 1.01  | 79.0  | -0.44 |
| <b>KW-2449</b>                          | 1000669-72-6 | free base | Aurora Kinase,Bcr-Abl,FLT3   | 85.6  | -0.03 | 55.1  | -1.12 | 91.7  | -0.29 | 74.2  | -0.59 |
| <b>KW-2478</b>                          | 819812-04-9  | free base | HSP (e.g. HSP90)             | 53.9  | -1.38 | 62.3  | -0.86 | 49.5  | -2.08 | 53.7  | -1.24 |
| <b>KX2-391</b>                          | 897016-82-9  | free base | Src                          | 45.9  | -1.72 | 50.2  | -1.30 | 59.7  | -1.65 | 26.7  | -2.09 |
| <b>KY02111</b>                          | 1118807-13-8 | free base | Wnt/beta-catenin             | 88.7  | 0.10  | 88.2  | 0.08  |       |       | 117.7 | 0.79  |
| <b>Labetalol HCl</b>                    | 32780-64-6   | Salt      | Adrenergic Receptor          | 84.8  | -0.07 | 82.4  | -0.13 | 80.3  | -0.77 | 93.6  | 0.03  |
| <b>Lacidipine</b>                       | 103890-78-4  | free base | Calcium Channel              | 80.6  | -0.25 | 116.2 | 1.10  | 87.9  | -0.45 | 123.0 | 0.96  |
| <b>L-Adrenaline</b>                     | 51-43-4      | free base | Adrenergic Receptor          | 105.1 | 0.79  | 50.8  | -1.28 | 134.2 | 1.52  | 117.5 | 0.78  |
| <b>Lafutidine</b>                       | 118288-08-7  | free base | Histamine Receptor           | 100.1 | 0.58  | 116.3 | 1.10  | 96.6  | -0.08 | 141.7 | 1.55  |
| <b>Lamivudine</b>                       | 134678-17-4  | free base | Reverse Transcriptase        | 107.6 | 0.90  | 114.9 | 1.05  | 109.2 | 0.45  | 76.5  | -0.52 |
| <b>Lamotrigine</b>                      | 84057-84-1   | free base | Sodium Channel,5-HT Receptor | 114.9 | 1.21  | 119.2 | 1.21  | 110.6 | 0.52  | 115.3 | 0.71  |
| <b>Lansoprazole</b>                     | 103577-45-3  | free base | Proton Pump                  | 78.8  | -0.32 | 70.8  | -0.55 | 101.8 | 0.14  | 94.9  | 0.07  |
| <b>Lapatinib (GW-572016) Ditosylate</b> | 388082-77-7  | ditosylat | HER2,EGFR                    | 95.7  | 0.39  | 115.7 | 1.08  | 93.2  | -0.22 | 109.2 | 0.52  |
| <b>LAQ824 (Dacinostat)</b>              | 404951-53-7  | free base | HDAC                         | 2.3   | -3.56 | 21.6  | -2.34 | 17.2  | -3.45 | 1.9   | -2.88 |
| <b>Laquinimod</b>                       | 248281-84-7  | free base | Others                       | 109.5 | 0.98  | 109.0 | 0.84  | 95.9  | -0.11 | 106.0 | 0.42  |
| <b>LB42708</b>                          | 226929-39-1  | free base | Ftase                        | 72.3  | -0.60 | 57.8  | -1.03 | 60.4  | -1.62 | 77.6  | -0.48 |
| <b>LDC000067</b>                        | 1073485-20-7 | free base | CDK                          | 95.9  | 0.40  | 115.4 | 1.07  | 92.2  | -0.27 | 77.1  | -0.50 |
| <b>LDE225 (NVP-LDE225,Erismodegib)</b>  | 956697-53-3  | free base | Hedgehog/Smoothened          | 81.3  | -0.21 | 81.4  | -0.17 | 93.4  | -0.22 | 117.1 | 0.77  |

|                                     |              |               |                           |       |       |       |       |       |       |       |       |
|-------------------------------------|--------------|---------------|---------------------------|-------|-------|-------|-------|-------|-------|-------|-------|
| <b>LDK378</b>                       | 1032900-25-6 | free base     | ALK                       | 65.0  | -0.91 | 80.1  | -0.21 | 72.2  | -1.11 | 120.3 | 0.87  |
| <b>LDN-212854</b>                   | 1432597-26-6 | free base     | BMP                       | 76.8  | -0.41 | 109.5 | 0.85  |       |       | 110.0 | 0.54  |
| <b>LDN-57444</b>                    | 668467-91-2  | free base     | DUB                       | 81.3  | -0.22 | 64.9  | -0.77 |       |       | 112.5 | 0.62  |
| <b>LEE011</b>                       | 1211441-98-3 | free base     | CDK                       | 67.0  | -0.82 | 115.8 | 1.08  | 67.3  | -1.32 | 115.8 | 0.73  |
| <b>Lenalidomide (CC-5013)</b>       | 191732-72-6  | free base     | TNF-alpha                 | 98.0  | 0.49  | 88.3  | 0.08  | 76.8  | -0.92 | 117.0 | 0.77  |
| <b>Lenvatinib (E7080)</b>           | 417716-92-8  | free base     | VEGFR                     | 106.7 | 0.86  | 116.9 | 1.12  | 98.2  | -0.01 | 61.9  | -0.98 |
| <b>Letrozole</b>                    | 112809-51-5  | free base     | Aromatase                 | 94.1  | 0.33  | 77.5  | -0.31 | 131.6 | 1.41  | 110.1 | 0.55  |
| <b>Leupeptin Hemisulfate</b>        | 103476-89-7  | free base     | Serine Protease           | 77.0  | -0.40 | 83.5  | -0.09 | 97.8  | -0.03 | 82.9  | -0.32 |
| <b>Levodropropizine</b>             | 99291-25-5   | free base     | Histamine Receptor        | 109.5 | 0.98  | 117.4 | 1.14  | 102.4 | 0.17  | 62.7  | -0.95 |
| <b>Levosulpiride</b>                | 23672-07-3   | free base     | Dopamine Receptor         | 106.1 | 0.83  | 98.6  | 0.46  | 92.8  | -0.24 | 134.5 | 1.32  |
| <b>LGK-974</b>                      | 1243244-14-5 | free base     | Wnt/beta-catenin          | 68.5  | -0.76 | 70.6  | -0.56 |       |       | 141.6 | 1.55  |
| <b>LGX818</b>                       | 1269440-17-6 | free base     | RAF                       | 86.0  | -0.02 | 62.1  | -0.87 |       |       | 120.8 | 0.89  |
| <b>Licofelone</b>                   | 156897-06-2  | free base     | COX                       | 115.5 | 1.23  | 112.5 | 0.96  | 84.6  | -0.59 | 116.3 | 0.74  |
| <b>Lidocaine</b>                    | 137-58-6     | free base     | Histamine Receptor        | 82.6  | -0.16 | 53.9  | -1.17 | 89.2  | -0.39 | 88.0  | -0.15 |
| <b>Linagliptin</b>                  | 668270-12-0  | free base     | DPP-4                     | 97.3  | 0.46  | 64.8  | -0.77 | 116.9 | 0.78  | 117.9 | 0.79  |
| <b>Linifanib (ABT-869)</b>          | 796967-16-3  | free base     | CSF-1R,PDGFR,VEGFR        | 102.5 | 0.68  | 109.2 | 0.84  | 84.3  | -0.60 | 122.0 | 0.92  |
| <b>Lomeguatrib</b>                  | 192441-08-0  | free base     | DNA Methyltransferase     | 75.5  | -0.46 | 70.5  | -0.56 | 102.9 | 0.19  | 130.5 | 1.19  |
| <b>Lomitapide</b>                   | 182431-12-5  | free base     | Others                    | 77.1  | -0.39 | 66.6  | -0.71 | 102.6 | 0.18  | 131.0 | 1.21  |
| <b>Lonafarnib</b>                   | 193275-84-2  | free base     | Transferase               | 94.5  | 0.34  | 105.9 | 0.72  | 94.4  | -0.17 | 92.4  | -0.01 |
| <b>Loperamide HCl</b>               | 34552-83-5   | hydrochloride | Opioid Receptor,Autophagy | 103.3 | 0.71  | 115.2 | 1.06  | 121.7 | 0.99  | 123.2 | 0.96  |
| <b>Lopinavir</b>                    | 192725-17-0  | free base     | HIV Protease              | 100.6 | 0.60  | 50.5  | -1.29 | 122.8 | 1.03  | 75.0  | -0.57 |
| <b>Loratadine</b>                   | 79794-75-5   | free base     | Histamine Receptor        | 85.8  | -0.03 | 51.1  | -1.27 | 125.9 | 1.17  | 81.8  | -0.35 |
| <b>Lorcaserin HCl</b>               | 846589-98-8  | hydrochloride | 5-HT Receptor             | 103.2 | 0.71  | 112.4 | 0.96  | 94.9  | -0.15 | 89.8  | -0.10 |
| <b>Lornoxicam</b>                   | 70374-39-9   | free base     | COX                       | 99.0  | 0.53  | 115.4 | 1.07  | 101.1 | 0.11  | 127.9 | 1.11  |
| <b>Losartan Potassium (DuP 753)</b> | 124750-99-8  | potassium     | RAAS                      | 82.9  | -0.15 | 109.5 | 0.85  | 121.6 | 0.98  | 86.2  | -0.21 |
| <b>Losmapimod (GW856553X)</b>       | 585543-15-3  | free base     | p38 MAPK                  | 75.3  | -0.47 | 62.1  | -0.87 |       |       | 105.0 | 0.39  |
| <b>Lovastatin</b>                   | 75330-75-5   | free base     | HMG-CoA Reductase         | 84.6  | -0.08 | 63.3  | -0.82 | 91.6  | -0.29 | 124.5 | 1.00  |
| <b>Loxistatin Acid (E-64C)</b>      | 76684-89-4   | free base     | Cysteine protease         | 93.3  | 0.29  | 116.7 | 1.12  | 90.9  | -0.32 | 85.3  | -0.24 |
| <b>Lumiracoxib</b>                  | 220991-20-8  | free base     | COX                       | 101.9 | 0.66  | 67.2  | -0.68 | 114.1 | 0.66  | 104.2 | 0.36  |

|                                       |              |                 |                                     |       |       |       |       |       |       |       |       |
|---------------------------------------|--------------|-----------------|-------------------------------------|-------|-------|-------|-------|-------|-------|-------|-------|
| <b>Luteolin</b>                       | 491-70-3     | free base       | PDE                                 | 113.9 | 1.16  | 110.2 | 0.88  | 99.8  | 0.06  | 82.3  | -0.33 |
| <b>LY2157299</b>                      | 700874-72-2  | free base       | TGF-beta/Smad                       | 100.1 | 0.58  | 54.8  | -1.14 | 100.2 | 0.07  | 118.0 | 0.80  |
| <b>LY2228820</b>                      | 862507-23-1  | mesylate        | p38 MAPK                            | 111.0 | 1.04  | 114.4 | 1.03  | 105.0 | 0.28  | 63.5  | -0.93 |
| <b>LY2603618</b>                      | 911222-45-2  | free base       | Chk                                 | 63.9  | -0.95 | 40.7  | -1.65 | 127.6 | 1.24  | 35.2  | -1.83 |
| <b>LY2784544</b>                      | 1229236-86-5 | free base       | JAK                                 | 82.7  | -0.16 | 53.5  | -1.18 | 65.9  | -1.38 | 77.1  | -0.50 |
| <b>LY2811376</b>                      | 1194044-20-6 | free base       | Beta Amyloid,Gamma-secretase        | 90.7  | 0.18  | 104.0 | 0.65  | 85.4  | -0.56 | 82.4  | -0.33 |
| <b>LY2835219</b>                      | 1231930-82-7 | mesylate        | CDK                                 | 57.3  | -1.23 | 71.6  | -0.52 |       |       | 76.9  | -0.50 |
| <b>LY294002</b>                       | 154447-36-6  | free base       | Autophagy,PI3K                      | 109.0 | 0.96  | 115.9 | 1.09  | 100.8 | 0.10  | 88.6  | -0.13 |
| <b>LY411575</b>                       | 209984-57-6  | free base       | Gamma-secretase                     | 115.5 | 1.23  | 64.6  | -0.78 | 111.0 | 0.53  | 108.4 | 0.50  |
| <b>M344</b>                           | 251456-60-7  | free base       | HDAC                                | 35.4  | -2.16 | 48.2  | -1.38 | 74.0  | -1.04 | 2.9   | -2.85 |
| <b>Macitentan</b>                     | 441798-33-0  | free base       | Endothelin Receptor                 | 81.2  | -0.22 | 61.0  | -0.91 | 105.3 | 0.29  | 129.2 | 1.15  |
| <b>Manidipine</b>                     | 89226-50-6   | free base       | Calcium Channel                     | 94.6  | 0.34  | 115.8 | 1.08  | 148.5 | 2.13  | 125.6 | 1.04  |
| <b>Manidipine 2HCl</b>                | 89226-75-5   | dihydrochloride | Calcium Channel                     | 99.1  | 0.54  | 112.7 | 0.97  | 122.4 | 1.02  | 117.9 | 0.79  |
| <b>Maprotiline HCl</b>                | 10347-81-6   | hydrochloride   | Adrenergic Receptor                 | 96.3  | 0.42  | 109.9 | 0.87  | 111.5 | 0.56  | 123.1 | 0.96  |
| <b>Maraviroc</b>                      | 376348-65-1  | free base       | CCR                                 | 91.4  | 0.21  | 114.6 | 1.04  | 109.8 | 0.48  | 98.9  | 0.19  |
| <b>Masitinib (AB1010)</b>             | 790299-79-5  | free base       | PDGFR,c-Kit                         | 102.8 | 0.69  | 114.5 | 1.04  | 81.2  | -0.73 | 96.7  | 0.12  |
| <b>MC1568</b>                         | 852475-26-4  | free base       | HDAC                                | 140.8 | 2.30  | 94.8  | 0.32  | 114.8 | 0.69  | 74.3  | -0.59 |
| <b>Mdivi-1</b>                        | 338967-87-6  | free base       | Dynamin                             | 79.3  | -0.30 | 61.8  | -0.88 |       |       | 101.1 | 0.26  |
| <b>ME0328</b>                         | 1445251-22-8 | free base       | PARP                                | 102.9 | 0.70  | 116.3 | 1.10  | 92.8  | -0.24 | 89.8  | -0.10 |
| <b>Meclofenamate Sodium</b>           | 6385-02-0    | free base       | COX                                 | 106.8 | 0.86  | 117.2 | 1.14  | 93.1  | -0.23 | 97.1  | 0.14  |
| <b>Medetomidine HCl</b>               | 86347-15-1   | hydrochloride   | Adrenergic Receptor                 | 90.4  | 0.17  | 119.1 | 1.20  | 104.1 | 0.24  | 113.1 | 0.64  |
| <b>Medroxyprogesterone acetate</b>    | 71-58-9      | free base       | Estrogen/progestogen Receptor       | 89.4  | 0.13  | 114.8 | 1.05  | 123.9 | 1.08  | 93.0  | 0.01  |
| <b>Mefenamic Acid</b>                 | 61-68-7      | free base       | COX                                 | 97.8  | 0.48  | 107.9 | 0.80  | 100.8 | 0.10  | 113.7 | 0.66  |
| <b>Mefloquine HCl</b>                 | 51773-92-3   | Salt            | Others                              | 83.5  | -0.12 | 81.0  | -0.18 | 78.7  | -0.84 | 139.9 | 1.49  |
| <b>Megestrol Acetate</b>              | 595-33-5     | acetate         | Estrogen Receptor,Androgen Receptor | 83.6  | -0.12 | 61.7  | -0.88 | 106.6 | 0.34  | 82.2  | -0.34 |
| <b>MEK162 (ARRY-162, ARRY-438162)</b> | 606143-89-9  | free base       | MEK                                 | 91.3  | 0.21  | 53.8  | -1.17 | 50.7  | -2.03 | 82.4  | -0.33 |
| <b>Memantine HCl</b>                  | 41100-52-1   | hydrochloride   | AMPA Receptor-kainate               | 96.4  | 0.42  | 116.9 | 1.12  | 101.4 | 0.13  | 124.8 | 1.01  |



|                                |              |                 | Receptor-NMDA Receptor        |       |       |       |       |       |       |       |       |
|--------------------------------|--------------|-----------------|-------------------------------|-------|-------|-------|-------|-------|-------|-------|-------|
| <b>Methazolamide</b>           | 554-57-4     | free base       | Carbonic Anhydrase            | 84.4  | -0.09 | 118.3 | 1.17  | 109.4 | 0.46  | 126.3 | 1.06  |
| <b>Methotrexate</b>            | 59-05-2      | free base       | DHFR                          | 82.3  | -0.17 | 63.3  | -0.82 | 97.1  | -0.06 | 75.6  | -0.54 |
| <b>Methscopolamine</b>         | 155-41-9     | bromide         | AChR                          | 120.3 | 1.43  | 104.1 | 0.66  | 104.7 | 0.26  | 126.8 | 1.08  |
| <b>Metoclopramide HCl</b>      | 7232-21-5    | Salt            | Dopamine Receptor             | 100.4 | 0.59  | 82.9  | -0.11 | 82.9  | -0.66 | 132.1 | 1.24  |
| <b>Metoprolol Tartrate</b>     | 392-17-7     | tartrate        | Adrenergic Receptor           | 93.8  | 0.31  | 71.8  | -0.52 | 116.2 | 0.75  | 94.6  | 0.06  |
| <b>MG-132</b>                  | 133407-82-6  | free base       | Proteasome                    | 2.4   | -3.56 | 4.0   | -2.98 | 33.5  | -2.76 | 13.4  | -2.52 |
| <b>MGCD-265</b>                | 875337-44-3  | free base       | Tie-2,VEGFR,c-Met             | 99.5  | 0.56  | 51.5  | -1.25 | 149.6 | 2.17  | 78.0  | -0.47 |
| <b>MI-2 (MALT1 inhibitor)</b>  | 1047953-91-2 | free base       | Others                        | 83.4  | -0.13 | 65.3  | -0.75 | 91.9  | -0.28 | 61.9  | -0.98 |
| <b>Mianserin HCl</b>           | 21535-47-7   | hydrochloride   | Histamine Receptor            | 122.4 | 1.52  | 64.8  | -0.77 | 109.3 | 0.46  | 76.1  | -0.53 |
| <b>Mifepristone</b>            | 84371-65-3   | free base       | Estrogen/progestogen Receptor | 98.5  | 0.51  | 85.9  | 0.00  | 117.5 | 0.81  | 98.6  | 0.18  |
| <b>Miliciclib (PHA-848125)</b> | 802539-81-7  | free base       | CDK                           | 65.1  | -0.90 | 66.2  | -0.72 | 66.8  | -1.35 | 72.8  | -0.63 |
| <b>Milrinone</b>               | 78415-72-2   | free base       | ATPase,PDE                    | 96.5  | 0.43  | 116.6 | 1.11  | 125.7 | 1.16  | 129.3 | 1.16  |
| <b>Mirabegron</b>              | 223673-61-8  | free base       | Adrenergic Receptor           | 92.1  | 0.24  | 87.2  | 0.04  | 109.5 | 0.47  | 123.5 | 0.97  |
| <b>MK-0752</b>                 | 471905-41-6  | free base       | Gamma-secretase,Beta Amyloid  | 114.4 | 1.19  | 91.4  | 0.20  | 114.0 | 0.66  | 116.1 | 0.74  |
| <b>MK-1775</b>                 | 955365-80-7  | free base       | Wee1                          | 86.8  | 0.02  | 24.7  | -2.23 | 94.7  | -0.16 | 34.7  | -1.84 |
| <b>MK-2048</b>                 | 869901-69-9  | free base       | Integrase                     | 79.1  | -0.31 | 114.2 | 1.03  | 134.1 | 1.51  | 103.8 | 0.35  |
| <b>MK-2206 2HCl</b>            | 1032350-13-2 | dihydrochloride | Akt                           | 54.4  | -1.35 | 113.2 | 0.99  | 94.3  | -0.18 | 99.7  | 0.22  |
| <b>MK-2461</b>                 | 917879-39-1  | free base       | c-Met,PDGFR,FGFR              | 77.3  | -0.39 | 114.4 | 1.03  | 105.9 | 0.31  | 115.4 | 0.71  |
| <b>MK-2866 (GTX-024)</b>       | 841205-47-8  | free base       | Androgen Receptor             | 118.0 | 1.34  | 116.1 | 1.09  | 115.2 | 0.71  | 66.5  | -0.83 |
| <b>MK-5108 (VX-689)</b>        | 1010085-13-8 | free base       | Aurora Kinase                 | 44.6  | -1.77 | 51.6  | -1.25 | 68.8  | -1.26 | 89.2  | -0.11 |
| <b>MK-801 (Dizocilpine)</b>    | 77086-21-6   | free base       | GluR                          | 84.8  | -0.07 | 49.5  | -1.33 | 114.3 | 0.67  | 107.0 | 0.45  |
| <b>MK-8245</b>                 | 1030612-90-8 | free base       | Dehydrogenase                 | 104.1 | 0.75  | 57.0  | -1.05 | 105.0 | 0.28  | 96.8  | 0.13  |
| <b>MK-8745</b>                 | 885325-71-3  | free base       | Aurora Kinase                 | 116.0 | 1.25  | 103.9 | 0.65  | 58.5  | -1.70 | 90.8  | -0.06 |
| <b>MK-8776 (SCH 900776)</b>    | 891494-63-6  | free base       | CDK,Chk                       | 68.1  | -0.78 | 52.7  | -1.21 | 123.4 | 1.06  | 50.0  | -1.36 |
| <b>ML130 (Nodinitib-1)</b>     | 799264-47-4  | free base       | NOD1                          | 89.1  | 0.11  | 74.7  | -0.41 | 103.2 | 0.20  | 102.3 | 0.30  |
| <b>ML133 HCl</b>               | 1222781-70-5 | hydrochloride   | Potassium Channel             | 70.9  | -0.66 | 61.9  | -0.88 | 127.7 | 1.24  | 134.1 | 1.31  |
| <b>ML167</b>                   | 1285702-20-6 | free base       | CDK                           | 90.4  | 0.17  | 65.0  | -0.76 | 101.2 | 0.11  | 112.2 | 0.61  |

|                                                                       |              |                 |                           |       |       |       |       |       |       |       |       |
|-----------------------------------------------------------------------|--------------|-----------------|---------------------------|-------|-------|-------|-------|-------|-------|-------|-------|
| <b>ML323</b>                                                          | 1572414-83-5 | free base       | DUB                       | 63.9  | -0.95 | 51.6  | -1.25 | 101.7 | 0.14  | 80.4  | -0.39 |
| <b>ML347</b>                                                          | 1062368-49-3 | free base       | BMP                       | 73.4  | -0.55 | 55.8  | -1.10 |       |       | 128.2 | 1.12  |
| <b>MLN2238</b>                                                        | 1072833-77-2 | free base       | Proteasome                | 4.2   | -3.48 | 4.0   | -2.98 | 52.5  | -1.95 | 2.8   | -2.85 |
| <b>MLN8054</b>                                                        | 869363-13-3  | free base       | Aurora Kinase             | 60.2  | -1.11 | 73.2  | -0.47 | 64.4  | -1.45 | 66.6  | -0.83 |
| <b>MLN9708</b>                                                        | 1201902-80-8 | free base       | Proteasome                | 3.7   | -3.50 | 4.2   | -2.97 | 52.2  | -1.96 | 2.4   | -2.86 |
| <b>MM-102</b>                                                         | 1417329-24-8 | free base       | Histone Methyltransferase | 80.3  | -0.26 | 115.5 | 1.07  | 103.1 | 0.20  | 103.3 | 0.33  |
| <b>MNS (3,4-Methylenedioxy-<math>\beta</math>-nitrostyrene, MDBN)</b> | 1485-00-3    | free base       | p97                       | 106.3 | 0.84  | 116.9 | 1.12  | 95.3  | -0.14 | 124.0 | 0.99  |
| <b>Mocetinostat (MGCD0103)</b>                                        | 726169-73-9  | free base       | HDAC                      | 38.4  | -2.03 | 66.8  | -0.70 | 91.4  | -0.30 | 0.0   | -2.94 |
| <b>Moclobemide (Ro 111163)</b>                                        | 71320-77-9   | free base       | MAO                       | 94.8  | 0.36  | 80.9  | -0.19 | 114.5 | 0.68  | 111.5 | 0.59  |
| <b>Moexipril HCl</b>                                                  | 82586-52-5   | hydrochloride   | RAAS                      | 119.1 | 1.38  | 114.0 | 1.02  | 102.6 | 0.17  | 130.3 | 1.19  |
| <b>Mosapride Citrate</b>                                              | 112885-42-4  | citrate         | 5-HT Receptor             | 86.1  | -0.01 | 72.8  | -0.48 | 105.0 | 0.28  | 103.9 | 0.35  |
| <b>Motesanib Diphosphate (AMG-706)</b>                                | 857876-30-3  | diphosphate     | VEGFR,PDGFR,c-Kit         | 96.1  | 0.41  | 116.0 | 1.09  | 107.7 | 0.39  | 133.3 | 1.28  |
| <b>Moxifloxacin HCl</b>                                               | 186826-86-8  | hydrochloride   | Topoisomerase             | 83.8  | -0.11 | 64.8  | -0.77 | 110.3 | 0.50  | 96.1  | 0.11  |
| <b>MPEP</b>                                                           | 96206-92-7   | free base       | GluR                      | 92.9  | 0.28  | 79.9  | -0.22 | 104.5 | 0.26  | 106.9 | 0.45  |
| <b>MPI-0479605</b>                                                    | 1246529-32-7 | free base       | Kinesin                   | 99.5  | 0.55  | 98.4  | 0.45  | 84.3  | -0.60 | 87.8  | -0.16 |
| <b>MRS 2578</b>                                                       | 711019-86-2  | free base       | P2 Receptor               | 93.0  | 0.28  | 92.6  | 0.24  | 107.8 | 0.40  | 104.5 | 0.37  |
| <b>Mubritinib (TAK 165)</b>                                           | 366017-09-6  | free base       | HER2                      | 37.7  | -2.06 | 45.8  | -1.46 | 96.0  | -0.11 | 80.2  | -0.40 |
| <b>Mupirocin</b>                                                      | 12650-69-0   | free base       | DNA/RNA Synthesis         | 106.4 | 0.85  | 118.4 | 1.18  | 96.4  | -0.09 | 125.0 | 1.02  |
| <b>Mycophenolate Mofetil</b>                                          | 128794-94-5  | free base       | Dehydrogenase             | 55.7  | -1.30 | 63.2  | -0.83 | 86.4  | -0.51 | 31.1  | -1.96 |
| <b>N6022</b>                                                          | 1208315-24-5 | free base       | Others                    | 75.5  | -0.46 | 67.9  | -0.66 | 74.7  | -1.01 | 73.2  | -0.62 |
| <b>Nabumetone</b>                                                     | 42924-53-8   | free base       | COX                       | 99.5  | 0.55  | 116.7 | 1.12  | 102.1 | 0.15  | 119.3 | 0.84  |
| <b>Nafamostat Mesylate</b>                                            | 82956-11-4   | mesylate        | Proteasome                | 83.9  | -0.11 | 82.8  | -0.11 | 85.5  | -0.55 | 90.4  | -0.08 |
| <b>Naftopidil</b>                                                     | 57149-07-2   | free base       | Adrenergic Receptor       | 122.9 | 1.55  | 111.6 | 0.93  | 83.3  | -0.64 | 85.9  | -0.22 |
| <b>Naftopidil DiHCl</b>                                               | 57149-08-3   | dihydrochloride | Adrenergic Receptor       | 86.4  | 0.00  | 51.2  | -1.26 | 118.3 | 0.84  | 74.5  | -0.58 |
| <b>Naloxone HCl</b>                                                   | 357-08-4     | hydrochloride   | Opioid Receptor           | 79.1  | -0.31 | 118.6 | 1.19  | 109.7 | 0.48  | 147.6 | 1.73  |
| <b>Naltrexone HCl</b>                                                 | 16676-29-2   | hydrochloride   | Opioid Receptor           | 107.2 | 0.88  | 95.0  | 0.33  | 117.8 | 0.82  | 98.2  | 0.17  |
| <b>Naphazoline HCl</b>                                                | 550-99-2     | hydrochloride   | Adrenergic Receptor       | 95.7  | 0.40  | 116.1 | 1.09  | 114.9 | 0.70  | 93.6  | 0.02  |
| <b>Naproxen</b>                                                       | 26159-34-2   | sodium          | COX                       | 91.2  | 0.20  | 115.1 | 1.06  | 105.9 | 0.32  | 75.0  | -0.56 |

|                                        |              |               |                           |       |       |       |       |       |       |       |       |
|----------------------------------------|--------------|---------------|---------------------------|-------|-------|-------|-------|-------|-------|-------|-------|
| <b>Naratriptan</b>                     | 143388-64-1  | free base     | 5-HT Receptor             | 87.3  | 0.04  | 68.1  | -0.65 | 110.5 | 0.51  | 99.2  | 0.20  |
| <b>Naringenin</b>                      | 480-41-1     | free base     | P450 (e.g. CYP17)         | 108.8 | 0.95  | 77.7  | -0.30 | 91.7  | -0.29 | 105.9 | 0.42  |
| <b>Nateglinide</b>                     | 105816-04-4  | free base     | Potassium Channel         | 75.5  | -0.46 | 47.6  | -1.40 | 135.7 | 1.58  | 107.2 | 0.46  |
| <b>Nebivolol</b>                       | 152520-56-4  | hydrochloride | Adrenergic Receptor       | 98.1  | 0.50  | 113.6 | 1.00  | 101.9 | 0.14  | 92.4  | -0.01 |
| <b>Necrostatin-1</b>                   | 4311-88-0    | free base     | TNF-alpha                 | 88.0  | 0.07  | 79.9  | -0.22 | 97.7  | -0.03 | 76.4  | -0.52 |
| <b>Nefiracetam</b>                     | 77191-36-7   | free base     | GABA Receptor             | 91.8  | 0.23  | 116.4 | 1.10  | 106.6 | 0.35  | 143.9 | 1.62  |
| <b>Nelfinavir Mesylate</b>             | 159989-65-8  | Salt          | HIV Protease              | 83.8  | -0.11 | 116.9 | 1.12  | 79.4  | -0.81 | 103.5 | 0.34  |
| <b>Nevirapine</b>                      | 129618-40-2  | free base     | Reverse Transcriptase     | 118.9 | 1.38  | 115.6 | 1.08  | 99.4  | 0.04  | 93.1  | 0.01  |
| <b>Nexturastat A</b>                   | 1403783-31-2 | free base     | HDAC                      | 67.7  | -0.79 | 109.3 | 0.85  | 103.0 | 0.19  | 138.2 | 1.44  |
| <b>NH125</b>                           | 278603-08-0  | free base     | ELF2                      | 69.6  | -0.71 | 59.9  | -0.95 | 113.9 | 0.66  | 22.4  | -2.23 |
| <b>Nicorandil</b>                      | 65141-46-0   | free base     | Potassium Channel         | 99.9  | 0.57  | 116.6 | 1.11  | 103.4 | 0.21  | 131.0 | 1.21  |
| <b>Niflumic acid</b>                   | 4394-00-7    | free base     | GABA Receptor             | 127.3 | 1.73  | 113.9 | 1.01  | 113.8 | 0.65  | 95.0  | 0.07  |
| <b>Nilotinib (AMN-107)</b>             | 641571-10-0  | free base     | Bcr-Abl                   | 75.6  | -0.46 | 88.9  | 0.11  | 120.8 | 0.95  | 79.8  | -0.41 |
| <b>Nilvadipine</b>                     | 75530-68-6   | free base     | Calcium Channel           | 78.9  | -0.32 | 105.7 | 0.72  | 117.1 | 0.79  | 102.3 | 0.30  |
| <b>Nimesulide</b>                      | 51803-78-2   | free base     | COX                       | 93.0  | 0.28  | 115.9 | 1.09  | 84.7  | -0.59 | 97.5  | 0.15  |
| <b>Nimodipine</b>                      | 66085-59-4   | free base     | Calcium Channel,Autophagy | 108.1 | 0.92  | 116.2 | 1.10  | 103.1 | 0.20  | 115.1 | 0.71  |
| <b>Nintedanib (BIBF 1120)</b>          | 656247-17-5  | free base     | VEGFR,PDGFR,FGFR          | 82.7  | -0.16 | 112.6 | 0.97  | 88.5  | -0.42 | 119.2 | 0.84  |
| <b>Nitrendipine</b>                    | 39562-70-4   | free base     | Calcium Channel,Autophagy | 79.0  | -0.32 | 50.0  | -1.31 | 117.0 | 0.79  | 98.4  | 0.18  |
| <b>Nizatidine</b>                      | 76963-41-2   | free base     | Histamine Receptor        | 121.6 | 1.49  | 101.6 | 0.57  | 103.6 | 0.22  | 124.8 | 1.01  |
| <b>NLG919</b>                          | 1402836-58-1 | free base     | IDO                       | 81.7  | -0.20 | 94.5  | 0.31  |       |       | 129.0 | 1.15  |
| <b>NMDA (N-Methyl-D-aspartic acid)</b> | 6384-92-5    | free base     | GluR                      | 85.5  | -0.04 | 76.5  | -0.35 | 86.1  | -0.53 | 121.3 | 0.90  |
| <b>NMS-873</b>                         | 1418013-75-8 | free base     | p97                       | 31.4  | -2.33 | 45.1  | -1.49 | 149.9 | 2.18  | 36.0  | -1.80 |
| <b>NMS-E973</b>                        | 1253584-84-7 | free base     | HSP90                     | 51.4  | -1.48 | 42.0  | -1.60 | 44.5  | -2.29 | 36.2  | -1.79 |
| <b>NMS-P937 (NMS1286937)</b>           | 1034616-18-6 | free base     | PLK                       | 60.8  | -1.09 | 50.5  | -1.29 |       |       | 38.5  | -1.72 |
| <b>Nocodazole</b>                      | 31430-18-9   | free base     | Microtubule associated    | 48.9  | -1.59 | 85.1  | -0.03 | 65.6  | -1.39 | 27.2  | -2.08 |
| <b>NPS-2143</b>                        | 284035-33-2  | free base     | CaSR                      | 106.7 | 0.86  | 113.9 | 1.02  | 106.3 | 0.33  | 104.2 | 0.36  |
| <b>NSC 23766</b>                       | 1177865-17-6 | hydrochloride | Rac                       | 76.0  | -0.44 | 60.9  | -0.91 | 108.8 | 0.44  | 143.5 | 1.60  |
| <b>NSC 319726</b>                      | 71555-25-4   | free base     | p53                       | 52.5  | -1.44 | 47.5  | -1.40 |       |       | 9.3   | -2.65 |
| <b>NSC 405020</b>                      | 7497-07-6    | free base     | MMP                       | 72.0  | -0.61 | 114.3 | 1.03  | 93.7  | -0.20 | 85.5  | -0.23 |

|                                        |                         |               |                                       |       |       |       |       |       |       |       |       |
|----------------------------------------|-------------------------|---------------|---------------------------------------|-------|-------|-------|-------|-------|-------|-------|-------|
| <b>NSC697923</b>                       | 343351-67-7             | free base     | E2                                    | 91.4  | 0.21  | 77.4  | -0.31 |       |       | 47.0  | -1.45 |
| <b>NU6027</b>                          | 220036-08-8             | free base     | CDK                                   | 67.4  | -0.80 | 86.5  | 0.02  |       |       | 88.8  | -0.13 |
| <b>NU7441 (KU-57788)</b>               | 503468-95-9             | free base     | DNA-PK,PI3K                           | 88.0  | 0.07  | 60.5  | -0.93 | 126.9 | 1.21  | 92.8  | 0.00  |
| <b>Nutlin-3</b>                        | 890090-75-2             | free base     | E3 Ligase ,Mdm2                       | 73.1  | -0.56 | 92.0  | 0.22  | 68.8  | -1.26 | 98.6  | 0.18  |
| <b>Nutlin-3a</b>                       | 675576-98-4             | free base     | Mdm2                                  | 59.7  | -1.13 | 66.7  | -0.70 | 81.6  | -0.72 | 83.7  | -0.29 |
| <b>Nutlin-3b</b>                       | 675576-97-3             | free base     | Mdm2                                  | 72.0  | -0.61 | 67.8  | -0.66 | 94.2  | -0.18 | 78.8  | -0.44 |
| <b>NVP-ADW742</b>                      | 475488-23-4             | free base     | IGF-1R                                | 50.5  | -1.52 | 93.3  | 0.27  | 69.6  | -1.23 | 85.6  | -0.23 |
| <b>NVP-AEW541</b>                      | 475489-16-8             | free base     | IGF-1R                                | 48.8  | -1.59 | 55.0  | -1.13 | 76.2  | -0.95 | 102.1 | 0.29  |
| <b>NVP-BHG712</b>                      | 940310-85-0             | free base     | Raf,Src,Bcr-Abl,VEGFR,Ephrin receptor | 105.2 | 0.80  | 57.6  | -1.03 | 94.2  | -0.18 | 79.6  | -0.42 |
| <b>NVP-BSK805 2HCI</b>                 | 1092499-93-8            | hydrochloride | JAK                                   | 77.4  | -0.38 | 55.0  | -1.13 | 137.0 | 1.64  | 120.0 | 0.86  |
| <b>NVP-BVU972</b>                      | 1185763-69-2            | free base     | c-Met                                 | 76.2  | -0.43 | 115.4 | 1.07  | 112.3 | 0.59  | 115.2 | 0.71  |
| <b>Obatoclox Mesylate (GX15-070)</b>   | 803712-79-0             | mesylate      | Bcl-2,Autophagy                       | 31.0  | -2.35 | 56.4  | -1.08 | 105.8 | 0.31  | 25.4  | -2.14 |
| <b>OC000459</b>                        | 851723-84-7,950688-14-9 | free base     | GPR                                   | 87.7  | 0.05  | 50.6  | -1.29 | 122.9 | 1.04  | 81.5  | -0.36 |
| <b>Odanacatib (MK-0822)</b>            | 603139-19-1             | free base     | Cathepsin K                           | 131.3 | 1.90  | 113.2 | 0.99  | 107.8 | 0.40  | 68.2  | -0.78 |
| <b>OG-L002</b>                         | 1357302-64-7            | free base     | Histone demethylases                  | 70.3  | -0.68 | 74.6  | -0.42 |       |       | 109.5 | 0.53  |
| <b>Olanzapine</b>                      | 132539-06-1             | free base     | 5-HT Receptor,Dopamine Receptor       | 80.0  | -0.27 | 55.4  | -1.11 | 120.5 | 0.94  | 103.8 | 0.35  |
| <b>Olaparib (AZD2281, Ku-0059436)</b>  | 763113-22-0             | free base     | PARP                                  | 89.1  | 0.11  | 109.6 | 0.86  | 109.7 | 0.48  | 102.2 | 0.30  |
| <b>Oligomycin A</b>                    | 579-13-5                | free base     | ATPase                                | 28.5  | -2.45 | 93.9  | 0.29  | 110.6 | 0.52  | 13.8  | -2.50 |
| <b>Olmesartan Medoxomil</b>            | 144689-63-4             | free base     | RAAS                                  | 93.1  | 0.28  | 116.0 | 1.09  | 87.6  | -0.46 | 72.0  | -0.66 |
| <b>Olopatadine HCl</b>                 | 140462-76-6             | hydrochloride | Histamine Receptor                    | 84.0  | -0.10 | 70.1  | -0.58 | 135.0 | 1.55  | 88.5  | -0.14 |
| <b>Omecamtiv mecarbil (CK-1827452)</b> | 873697-71-3             | free base     | ATPase                                | 103.8 | 0.74  | 69.2  | -0.61 | 123.3 | 1.05  | 128.6 | 1.13  |
| <b>Omeprazole</b>                      | 73590-58-6              | free base     | Autophagy,Proton Pump                 | 84.7  | -0.07 | 116.3 | 1.10  | 108.7 | 0.44  | 82.9  | -0.32 |
| <b>Ondansetron HCl</b>                 | 99614-01-4              | hydrochloride | 5-HT Receptor                         | 93.1  | 0.28  | 114.6 | 1.04  | 108.9 | 0.44  | 101.3 | 0.27  |
| <b>ONX-0914 (PR-957)</b>               | 960374-59-8             | free base     | Proteasome                            | 9.7   | -3.25 | 3.4   | -3.00 |       |       | 0.6   | -2.92 |
| <b>Oprozomib (ONX 0912)</b>            | 935888-69-0             | free base     | Proteasome                            | 8.7   | -3.29 | 2.8   | -3.02 | 34.5  | -2.72 | 5.4   | -2.77 |
| <b>Optovin</b>                         | 348575-88-2             | free base     | Others                                | 72.0  | -0.61 | 113.1 | 0.98  | 98.8  | 0.01  | 113.8 | 0.66  |
| <b>Org 27569</b>                       | 868273-06-7             | free base     | Cannabinoid Receptor                  | 130.9 | 1.88  | 104.9 | 0.69  | 122.0 | 1.00  | 94.0  | 0.04  |
| <b>Orphenadrine Citrate</b>            | 4682-36-4               | citrate       | AChR                                  | 100.4 | 0.59  | 116.1 | 1.09  | 100.5 | 0.08  | 77.5  | -0.48 |

|                                     |              |               |                      |       |       |       |       |       |       |       |       |
|-------------------------------------|--------------|---------------|----------------------|-------|-------|-------|-------|-------|-------|-------|-------|
| <b>OSI-027</b>                      | 936890-98-1  | free base     | mTOR                 | 68.5  | -0.76 | 69.3  | -0.61 | 81.7  | -0.71 | 75.6  | -0.54 |
| <b>OSI-420</b>                      | 183320-51-6  | hydrochloride | EGFR                 | 106.9 | 0.87  | 55.3  | -1.11 | 87.7  | -0.46 | 109.1 | 0.52  |
| <b>OSI-906 (Linsitinib)</b>         | 867160-71-2  | free base     | IGF-1R               | 45.9  | -1.71 | 62.5  | -0.85 | 58.1  | -1.71 | 110.7 | 0.57  |
| <b>OSI-930</b>                      | 728033-96-3  | free base     | c-Kit,CSF-1R,VEGFR   | 101.9 | 0.65  | 71.5  | -0.53 | 171.1 | 3.08  | 91.2  | -0.05 |
| <b>Ospemifene</b>                   | 128607-22-7  | free base     | Estrogen/progestogen | 81.9  | -0.19 | 117.4 | 1.14  | 88.1  | -0.44 | 109.6 | 0.53  |
| <b>OSU-03012 (AR-12)</b>            | 742112-33-0  | free base     | PDK-1                | 226.7 | 5.94  | 109.3 | 0.85  | 96.0  | -0.10 | 96.4  | 0.11  |
| <b>Otilonium Bromide</b>            | 26095-59-0   | free base     | AChR                 | 89.3  | 0.12  | 103.1 | 0.62  | 116.3 | 0.76  | 104.4 | 0.37  |
| <b>OTX015</b>                       | 202590-98-5  | free base     | BET                  | 30.8  | -2.36 | 47.9  | -1.39 | 51.0  | -2.02 | 12.2  | -2.55 |
| <b>Ouabain</b>                      | 630-60-4     | free base     | Sodium Channel       | 41.0  | -1.92 | 12.1  | -2.69 | 25.7  | -3.09 | 20.6  | -2.29 |
| <b>Oxcarbazepine</b>                | 28721-07-5   | free base     | Sodium Channel       | 80.7  | -0.24 | 54.5  | -1.15 | 126.6 | 1.20  | 99.9  | 0.23  |
| <b>Oxiracetam</b>                   | 62613-82-5   | free base     | Others               | 76.8  | -0.41 | 78.1  | -0.29 | 84.2  | -0.61 | 103.3 | 0.33  |
| <b>Oxybutynin chloride</b>          | 1508-65-2    | chloride      | AChR                 | 89.3  | 0.12  | 119.2 | 1.21  | 98.6  | 0.01  | 119.7 | 0.85  |
| <b>Oxymetazoline HCl</b>            | 2315-02-8    | hydrochloride | Adrenergic Receptor  | 77.4  | -0.38 | 49.8  | -1.32 | 119.5 | 0.89  | 142.2 | 1.56  |
| <b>Ozagrel</b>                      | 82571-53-7   | free base     | Factor Xa            | 91.6  | 0.22  | 58.4  | -1.00 | 148.5 | 2.13  | 137.9 | 1.43  |
| <b>P22077</b>                       | 1247819-59-5 | free base     | DUB                  | 70.3  | -0.68 | 73.4  | -0.46 |       |       | 123.1 | 0.96  |
| <b>P276-00</b>                      | 920113-03-7  | hydrochloride | CDK                  | 24.7  | -2.61 | 32.3  | -1.95 | 70.2  | -1.20 | 27.6  | -2.07 |
| <b>P5091 (P005091)</b>              | 882257-11-6  | free base     | DUB                  | 72.3  | -0.60 | 85.2  | -0.03 |       |       | 93.8  | 0.03  |
| <b>PAC-1</b>                        | 315183-21-2  | free base     | Caspase              | 89.5  | 0.13  | 114.0 | 1.02  | 112.3 | 0.59  | 114.7 | 0.69  |
| <b>Pacritinib (SB1518)</b>          | 937272-79-2  | free base     | JAK                  | 75.0  | -0.48 | 67.3  | -0.68 | 103.5 | 0.21  | 91.4  | -0.04 |
| <b>Palbociclib (PD-0332991) HCl</b> | 827022-32-2  | hydrochloride | CDK                  | 105.6 | 0.81  | 103.0 | 0.62  | 68.0  | -1.29 | 54.2  | -1.22 |
| <b>Palomid 529 (P529)</b>           | 914913-88-5  | free base     | mTOR                 | 90.8  | 0.19  | 79.7  | -0.23 | 77.4  | -0.90 | 106.5 | 0.43  |
| <b>Pancuronium dibromide</b>        | 15500-66-0   | bromide       | AChR                 | 97.2  | 0.46  | 111.3 | 0.92  | 122.7 | 1.03  | 118.4 | 0.81  |
| <b>Panobinostat (LBH589)</b>        | 404950-80-7  | free base     | HDAC                 | 2.4   | -3.56 | 22.2  | -2.32 | 13.8  | -3.60 | 2.4   | -2.87 |
| <b>Paroxetine HCl</b>               | 78246-49-8   | hydrochloride | AChR,5-HT Receptor   | 140.9 | 2.31  | 112.9 | 0.98  | 111.1 | 0.54  | 121.9 | 0.92  |
| <b>Pazopanib</b>                    | 444731-52-6  | free base     | PDGFR,c-Kit,VEGFR    | 122.9 | 1.55  | 116.5 | 1.11  | 157.6 | 2.51  | 117.6 | 0.78  |
| <b>Pazopanib HCl (GW786034 HCl)</b> | 635702-64-6  | hydrochloride | VEGFR,PDGFR,c-Kit    | 83.1  | -0.14 | 113.3 | 0.99  | 122.8 | 1.03  | 110.1 | 0.55  |
| <b>PCI-24781 (Abexinostat)</b>      | 783355-60-2  | free base     | HDAC                 | 2.6   | -3.55 | 21.5  | -2.35 | 19.5  | -3.36 | 2.5   | -2.86 |
| <b>PCI-34051</b>                    | 950762-95-5  | free base     | HDAC                 | 98.1  | 0.49  | 113.3 | 0.99  | 106.5 | 0.34  | 95.4  | 0.08  |
| <b>PD 151746</b>                    | 179461-52-0  | free base     | Cysteine Protease    | 73.6  | -0.54 | 107.1 | 0.77  | 91.6  | -0.29 | 125.0 | 1.02  |

|                                      |              |                 |                   |       |       |       |       |       |       |       |       |
|--------------------------------------|--------------|-----------------|-------------------|-------|-------|-------|-------|-------|-------|-------|-------|
| <b>PD0325901</b>                     | 391210-10-9  | free base       | MEK               | 84.9  | -0.06 | 30.8  | -2.01 | 50.3  | -2.05 | 109.6 | 0.53  |
| <b>PD123319</b>                      | 130663-39-7  | free base       | RAAS              | 82.7  | -0.16 | 61.6  | -0.89 |       |       | 95.2  | 0.08  |
| <b>PD128907 HCl</b>                  | 112960-16-4  | hydrochloride   | Dopamine Receptor | 94.9  | 0.36  | 106.9 | 0.76  | 81.2  | -0.73 | 83.5  | -0.29 |
| <b>PD168393</b>                      | 194423-15-9  | free base       | EGFR              | 93.0  | 0.28  | 63.4  | -0.82 | 69.1  | -1.25 | 90.1  | -0.09 |
| <b>PD168393</b>                      | 194423-15-9  | free base       | EGFR              | 72.4  | -0.59 | 102.6 | 0.60  | 74.5  | -1.02 | 98.0  | 0.16  |
| <b>PD173074</b>                      | 219580-11-7  | free base       | VEGFR,FGFR        | 96.3  | 0.42  | 103.3 | 0.63  | 97.1  | -0.06 | 61.4  | -1.00 |
| <b>PD173955</b>                      | 260415-63-2  | free base       | BCR-ABL           | 64.5  | -0.93 | 101.5 | 0.56  | 100.0 | 0.06  | 54.7  | -1.21 |
| <b>PD184352 (CI-1040)</b>            | 212631-79-3  | free base       | MEK               | 93.8  | 0.31  | 57.3  | -1.04 | 44.2  | -2.31 | 91.5  | -0.04 |
| <b>PD318088</b>                      | 391210-00-7  | free base       | MEK               | 87.7  | 0.05  | 30.3  | -2.02 | 51.5  | -1.99 | 82.7  | -0.32 |
| <b>PD98059</b>                       | 167869-21-8  | free base       | MEK               | 77.5  | -0.38 | 109.0 | 0.84  | 122.1 | 1.01  | 75.3  | -0.55 |
| <b>Pefloxacin Mesylate Dihydrate</b> | 149676-40-4  | Mesylate        | Topoisomerase     | 89.2  | 0.12  | 85.3  | -0.03 | 82.4  | -0.68 | 117.8 | 0.79  |
| <b>Pelitinib (EKB-569)</b>           | 257933-82-7  | free base       | EGFR              | 74.4  | -0.51 | 54.7  | -1.14 | 112.2 | 0.58  | 75.7  | -0.54 |
| <b>Pergolide mesylate</b>            | 66104-23-2   | mesylate        | Dopamine Receptor | 92.2  | 0.25  | 118.4 | 1.18  | 101.8 | 0.14  | 125.3 | 1.03  |
| <b>PF-00562271</b>                   | 939791-38-5  | benzenesulfonic | FAK               | 62.6  | -1.01 | 107.3 | 0.78  | 101.5 | 0.13  | 89.1  | -0.12 |
| <b>PF-04217903</b>                   | 956905-27-4  | free base       | c-Met             | 110.8 | 1.03  | 115.1 | 1.06  | 87.2  | -0.48 | 121.9 | 0.92  |
| <b>PF-04620110</b>                   | 1109276-89-2 | free base       | Transferase       | 75.3  | -0.47 | 97.2  | 0.41  |       |       | 105.2 | 0.39  |
| <b>PF-04691502</b>                   | 1013101-36-4 | free base       | Akt,mTOR,PI3K     | 38.5  | -2.03 | 36.7  | -1.79 | 68.9  | -1.25 | 48.8  | -1.39 |
| <b>PF-04929113 (SNX-5422)</b>        | 908115-27-5  | free base       | HSP (e.g. HSP90)  | 50.3  | -1.53 | 29.2  | -2.07 | 40.3  | -2.47 | 52.3  | -1.28 |
| <b>PF-2545920</b>                    | 1292799-56-4 | free base       | PDE               | 112.9 | 1.12  | 62.2  | -0.87 | 118.5 | 0.85  | 116.2 | 0.74  |
| <b>PF-3758309</b>                    | 898044-15-0  | free base       | PAK               | 66.5  | -0.84 | 36.4  | -1.80 |       |       | 16.8  | -2.41 |
| <b>PF-3845</b>                       | 1196109-52-0 | free base       | FAAH              | 89.2  | 0.12  | 111.8 | 0.94  | 131.5 | 1.40  | 100.0 | 0.23  |
| <b>PF-4708671</b>                    | 1255517-76-0 | free base       | S6 Kinase         | 100.3 | 0.59  | 100.9 | 0.54  | 108.1 | 0.41  | 106.9 | 0.45  |
| <b>PF-477736</b>                     | 952021-60-2  | free base       | Chk               | 60.4  | -1.10 | 19.2  | -2.43 | 106.3 | 0.33  | 30.6  | -1.97 |
| <b>PF-4981517</b>                    | 1390637-82-7 | free base       | P450 (e.g. CYP17) | 107.0 | 0.87  | 98.4  | 0.45  | 100.5 | 0.09  | 96.2  | 0.11  |
| <b>PF-5274857</b>                    | 1373615-35-0 | free base       | Hedgehog/Smoothed | 116.5 | 1.28  | 98.4  | 0.45  | 111.0 | 0.53  | 115.6 | 0.72  |
| <b>PF-543</b>                        | 1415562-82-1 | free base       | S1P Receptor      | 88.2  | 0.08  | 77.4  | -0.31 |       |       | 121.0 | 0.89  |
| <b>PF-562271</b>                     | 717907-75-0  | free base       | FAK               | 70.1  | -0.69 | 51.6  | -1.25 | 115.7 | 0.73  | 92.0  | -0.03 |
| <b>PF-562271 HCl</b>                 | N/A          | hydrochloride   | FAK               | 73.1  | -0.56 | 77.8  | -0.30 | 83.3  | -0.64 | 87.5  | -0.17 |

|                                                               |              |               |                               |       |       |       |       |       |       |       |       |
|---------------------------------------------------------------|--------------|---------------|-------------------------------|-------|-------|-------|-------|-------|-------|-------|-------|
| <b>PF-573228</b>                                              | 869288-64-2  | free base     | FAK                           | 105.0 | 0.79  | 107.6 | 0.78  | 104.0 | 0.24  | 111.4 | 0.59  |
| <b>PFI-1 (PF-6405761)</b>                                     | 1403764-72-6 | free base     | Epigenetic Reader Domain      | 87.1  | 0.03  | 94.9  | 0.32  | 87.7  | -0.46 | 60.5  | -1.02 |
| <b>PFK15</b>                                                  | 4382-63-2    | free base     | Others                        | 80.9  | -0.23 | 67.5  | -0.67 | 77.2  | -0.90 | 109.2 | 0.52  |
| <b>PH-797804</b>                                              | 586379-66-0  | free base     | p38 MAPK                      | 81.2  | -0.22 | 114.3 | 1.03  | 118.8 | 0.86  | 91.8  | -0.03 |
| <b>PHA-665752</b>                                             | 477575-56-7  | free base     | c-Met                         | 92.9  | 0.28  | 115.7 | 1.08  | 115.7 | 0.73  | 109.7 | 0.53  |
| <b>PHA-680632</b>                                             | 398493-79-3  | free base     | Aurora Kinase                 | 71.6  | -0.63 | 54.6  | -1.14 | 65.5  | -1.40 | 53.7  | -1.24 |
| <b>PHA-767491</b>                                             | 845714-00-3  | free base     | CDK                           | 97.6  | 0.48  | 72.8  | -0.48 | 107.9 | 0.40  | 114.4 | 0.68  |
| <b>PHA-793887</b>                                             | 718630-59-2  | free base     | CDK                           | 67.1  | -0.82 | 91.9  | 0.21  | 63.9  | -1.47 | 18.0  | -2.37 |
| <b>Phenacetin</b>                                             | 62-44-2      | free base     | COX                           | 113.7 | 1.16  | 65.3  | -0.75 | 130.6 | 1.37  | 123.2 | 0.96  |
| <b>Phenformin HCl</b>                                         | 834-28-6     | hydrochloride | AMPK                          | 81.7  | -0.20 | 115.5 | 1.07  | 126.1 | 1.17  | 122.1 | 0.93  |
| <b>Phenoxybenzamine HCl</b>                                   | 63-92-3      | hydrochloride | Adrenergic Receptor           | 109.5 | 0.98  | 115.8 | 1.08  | 118.3 | 0.84  | 120.9 | 0.89  |
| <b>Phentolamine Mesylate</b>                                  | 65-28-1      | mesylate      | Adrenergic Receptor           | 96.3  | 0.42  | 115.9 | 1.09  | 103.0 | 0.19  | 107.0 | 0.45  |
| <b>Phenylephrine HCl</b>                                      | 61-76-7      | hydrochloride | Adrenergic Receptor           | 94.4  | 0.34  | 49.6  | -1.32 | 118.8 | 0.86  | 141.8 | 1.55  |
| <b>Phenytoin</b>                                              | 57-41-0      | free base     | Sodium Channel                | 80.9  | -0.23 | 58.1  | -1.01 | 102.6 | 0.17  | 139.6 | 1.48  |
| <b>Phenytoin sodium</b>                                       | 630-93-3     | sodium        | Sodium Channel                | 83.2  | -0.14 | 115.7 | 1.08  | 105.9 | 0.32  | 124.4 | 1.00  |
| <b>Phosphoramidon Disodium Salt</b>                           | 164204-38-0  | Salt          | Others                        | 78.0  | -0.36 | 73.6  | -0.45 | 126.1 | 1.17  | 74.1  | -0.59 |
| <b>PHT-427</b>                                                | 1191951-57-1 | free base     | PDK-1,Akt                     | 87.7  | 0.05  | 59.1  | -0.98 | 111.2 | 0.54  | 97.7  | 0.15  |
| <b>PI-103</b>                                                 | 371935-74-9  | free base     | PI3K, Autophagy, DNA-PK, mTOR | 38.9  | -2.01 | 49.0  | -1.35 | 58.0  | -1.72 | 55.3  | -1.19 |
| <b>PI-1840</b>                                                | 1401223-22-0 | free base     | Proteasome                    | 90.2  | 0.16  | 107.1 | 0.77  | 101.3 | 0.12  | 104.2 | 0.36  |
| <b>Piceatannol</b>                                            | 10083-24-6   | free base     | Syk                           | 102.6 | 0.69  | 64.9  | -0.77 | 127.2 | 1.22  | 120.4 | 0.87  |
| <b>Pifithrin-<math>\alpha</math> (PFT<math>\alpha</math>)</b> | 63208-82-2   | HBr           | p53, Autophagy                | 100.5 | 0.60  | 77.2  | -0.32 | 107.4 | 0.38  | 110.0 | 0.54  |
| <b>Pifithrin-<math>\mu</math></b>                             | 64984-31-2   | free base     | p53                           | 106.0 | 0.83  | 74.3  | -0.43 | 128.3 | 1.27  | 108.0 | 0.48  |
| <b>PIK-293</b>                                                | 900185-01-5  | free base     | PI3K                          | 108.7 | 0.94  | 62.9  | -0.84 | 88.6  | -0.42 | 110.7 | 0.57  |
| <b>PIK-294</b>                                                | 900185-02-6  | free base     | PI3K                          | 111.6 | 1.07  | 57.6  | -1.03 | 79.7  | -0.80 | 82.4  | -0.33 |
| <b>PIK-75</b>                                                 | 372196-77-5  | hydrochloride | PI3K, DNA-PK                  | 49.3  | -1.57 | 36.8  | -1.79 | 31.7  | -2.84 | 11.9  | -2.56 |
| <b>PIK-93</b>                                                 | 593960-11-3  | free base     | PI3K                          | 64.8  | -0.91 | 73.7  | -0.45 | 113.9 | 0.66  | 85.4  | -0.23 |
| <b>Pimasertib (AS-703026)</b>                                 | 1236699-92-5 | free base     | MEK                           | 99.7  | 0.56  | 29.6  | -2.05 | 57.1  | -1.76 | 76.3  | -0.52 |
| <b>Pimobendan</b>                                             | 74150-27-9   | free base     | PDE                           | 77.7  | -0.37 | 113.1 | 0.99  | 105.7 | 0.31  | 79.0  | -0.44 |

|                                 |              |               |                               |       |       |       |       |       |       |       |       |
|---------------------------------|--------------|---------------|-------------------------------|-------|-------|-------|-------|-------|-------|-------|-------|
| <b>Pioglitazone HCl</b>         | 112529-15-4  | hydrochloride | P450 (e.g. CYP17)             | 100.3 | 0.59  | 116.9 | 1.12  | 99.9  | 0.06  | 123.1 | 0.96  |
| <b>Pirarubicin</b>              | 72496-41-4   | free base     | Topoisomerase                 | 8.8   | -3.29 | 48.7  | -1.35 | 71.3  | -1.15 | 4.4   | -2.80 |
| <b>Pirfenidone</b>              | 53179-13-8   | free base     | TGF-beta/Smad                 | 82.9  | -0.15 | 53.4  | -1.18 | 100.2 | 0.07  | 109.0 | 0.51  |
| <b>Piroxicam</b>                | 36322-90-4   | free base     | COX                           | 107.7 | 0.90  | 114.1 | 1.02  | 108.3 | 0.42  | 73.1  | -0.62 |
| <b>PJ34</b>                     | 344458-19-1  | hydrochloride | PARP                          | 81.9  | -0.19 | 63.5  | -0.82 | 101.6 | 0.13  | 83.3  | -0.30 |
| <b>PJ34 HCl</b>                 | 344458-15-7  | Salt          | PARP                          | 77.9  | -0.36 | 67.5  | -0.67 | 93.3  | -0.22 | 119.9 | 0.86  |
| <b>PluriSIn #1 (NSC 14613)</b>  | 91396-88-2   | free base     | Dehydrogenase                 | 73.1  | -0.56 | 112.1 | 0.95  | 94.7  | -0.16 | 134.5 | 1.32  |
| <b>PLX-4720</b>                 | 918505-84-7  | free base     | Raf                           | 121.0 | 1.46  | 116.8 | 1.12  | 190.3 | 3.90  | 69.4  | -0.74 |
| <b>PNU-120596</b>               | 501925-31-1  | free base     | AChR                          | 75.6  | -0.46 | 112.2 | 0.95  | 99.9  | 0.06  | 127.9 | 1.11  |
| <b>Pomalidomide</b>             | 19171-19-8   | free base     | TNF-alpha                     | 86.4  | 0.00  | 114.3 | 1.03  | 111.2 | 0.54  | 93.5  | 0.02  |
| <b>Ponatinib (AP24534)</b>      | 943319-70-8  | free base     | PDGFR,FGFR,VEGFR,Bcr-Abl      | 73.9  | -0.53 | 102.0 | 0.58  | 72.5  | -1.10 | 52.8  | -1.27 |
| <b>PP1</b>                      | 172889-26-8  | free base     | Src                           | 77.0  | -0.40 | 116.4 | 1.11  | 105.4 | 0.30  | 84.3  | -0.27 |
| <b>PP121</b>                    | 1092788-83-4 | free base     | DNA-PK,PDGFR,mTOR             | 60.4  | -1.10 | 52.6  | -1.21 | 126.3 | 1.18  | 72.9  | -0.63 |
| <b>PP2</b>                      | 172889-27-9  | free base     | Src                           | 98.5  | 0.51  | 116.7 | 1.11  | 83.3  | -0.65 | 119.0 | 0.83  |
| <b>PP242</b>                    | 1092351-67-1 | free base     | mTOR,Autophagy                | 70.9  | -0.66 | 50.6  | -1.29 | 79.4  | -0.81 | 63.2  | -0.94 |
| <b>PQ 401</b>                   | 196868-63-0  | free base     | IGF-1R                        | 71.8  | -0.62 | 56.8  | -1.06 | 102.2 | 0.16  | 105.7 | 0.41  |
| <b>PR-619</b>                   | 2645-32-1    | free base     | DUB                           | 67.4  | -0.80 | 53.7  | -1.17 |       |       | 88.1  | -0.15 |
| <b>Pracinostat (SB939)</b>      | 929016-96-6  | free base     | HDAC                          | 11.1  | -3.19 | 49.3  | -1.33 | 53.2  | -1.92 | 3.5   | -2.83 |
| <b>Pralatrexate</b>             | 146464-95-1  | free base     | DHFR                          | 116.2 | 1.26  | 91.5  | 0.20  | 93.6  | -0.21 | 70.1  | -0.72 |
| <b>Pramipexole</b>              | 104632-26-0  | free base     | Dopamine Receptor             | 111.0 | 1.04  | 83.9  | -0.08 | 118.2 | 0.84  | 109.4 | 0.52  |
| <b>Prasugrel</b>                | 150322-43-3  | free base     | P2 Receptor                   | 95.7  | 0.39  | 112.1 | 0.95  | 127.3 | 1.23  | 105.0 | 0.39  |
| <b>Pravastatin sodium</b>       | 81131-70-6   | free base     | HMG-CoA Reductase             | 117.3 | 1.31  | 113.2 | 0.99  | 113.8 | 0.65  | 129.8 | 1.17  |
| <b>Pregnenolone</b>             | 145-13-1     | free base     | Estrogen/progestogen Receptor | 128.2 | 1.77  | 114.0 | 1.02  | 111.2 | 0.54  | 127.3 | 1.09  |
| <b>Pritelivir (BAY 57-1293)</b> | 348086-71-5  | free base     | Others                        | 87.5  | 0.05  | 57.3  | -1.04 | 101.3 | 0.12  | 85.0  | -0.25 |
| <b>Procainamide HCl</b>         | 614-39-1     | Salt          | Sodium Channel                | 87.1  | 0.03  | 84.8  | -0.04 | 84.0  | -0.62 | 110.9 | 0.57  |
| <b>Procaine HCl</b>             | 51-05-8      | hydrochloride | Sodium Channel                | 96.9  | 0.44  | 85.5  | -0.02 | 108.3 | 0.42  | 125.1 | 1.02  |
| <b>Promethazine HCl</b>         | 58-33-3      | Salt          | Histamine Receptor            | 93.1  | 0.28  | 73.9  | -0.44 | 86.7  | -0.50 | 105.8 | 0.41  |
| <b>Propafenone HCl</b>          | 34183-22-7   | free base     | Sodium Channel                | 89.8  | 0.14  | 117.4 | 1.14  | 112.1 | 0.58  | 105.2 | 0.39  |



|                                         |              |               |                               |       |       |       |       |       |       |       |       |
|-----------------------------------------|--------------|---------------|-------------------------------|-------|-------|-------|-------|-------|-------|-------|-------|
| <b>Proparacaine HCl</b>                 | 5875-06-9    | hydrochloride | Sodium Channel                | 98.3  | 0.50  | 115.3 | 1.06  | 116.0 | 0.75  | 93.6  | 0.03  |
| <b>Propranolol HCl</b>                  | 318-98-9     | hydrochloride | Adrenergic Receptor           | 139.4 | 2.25  | 113.9 | 1.01  | 98.1  | -0.02 | 110.4 | 0.56  |
| <b>PRT062607 (P505-15, BIIB057) HCl</b> | 1370261-97-4 | hydrochloride | Syk                           | 65.4  | -0.89 | 61.7  | -0.88 | 105.2 | 0.28  | 85.6  | -0.23 |
| <b>Prucalopride</b>                     | 179474-81-8  | free base     | 5-HT Receptor                 | 101.9 | 0.66  | 81.6  | -0.16 | 103.7 | 0.22  | 100.4 | 0.24  |
| <b>PRX-08066 Maleic acid</b>            | 866206-55-5  | maleate       | 5-HT Receptor                 | 92.5  | 0.26  | 65.3  | -0.75 | 106.3 | 0.33  | 78.6  | -0.45 |
| <b>PTC-209</b>                          | 315704-66-6  | free base     | BMI                           | 27.3  | -2.50 | 94.5  | 0.31  | 84.0  | -0.61 | 37.6  | -1.75 |
| <b>PTC-209 HBr</b>                      | 1217022-63-3 | free base     | Others                        | 25.0  | -2.60 | 50.7  | -1.28 | 105.1 | 0.28  | 37.1  | -1.76 |
| <b>PU-H71</b>                           | 873436-91-0  | free base     | HSP (e.g. HSP90)              | 41.3  | -1.91 | 42.7  | -1.57 | 41.3  | -2.43 | 50.5  | -1.34 |
| <b>Purmorphamine</b>                    | 483367-10-8  | free base     | Hedgehog/Smoothened           | 104.3 | 0.76  | 66.2  | -0.72 | 113.9 | 0.65  | 123.4 | 0.97  |
| <b>Puromycin 2HCl</b>                   | 58-58-2      | Salt          | Others                        | 15.3  | -3.01 | 74.1  | -0.43 | 63.2  | -1.50 | 1.4   | -2.90 |
| <b>PYR-41</b>                           | 418805-02-4  | free base     | E1 Activating                 | 68.7  | -0.75 | 60.2  | -0.94 |       |       | 139.4 | 1.48  |
| <b>Pyridostigmine Bromide</b>           | 101-26-8     | bromide       | AChR                          | 126.4 | 1.69  | 110.3 | 0.88  | 114.6 | 0.68  | 95.7  | 0.09  |
| <b>Pyrimethamine</b>                    | 58-14-0      | free base     | DHFR                          | 95.7  | 0.39  | 116.5 | 1.11  | 107.1 | 0.37  | 129.5 | 1.16  |
| <b>QNZ (EVP4593)</b>                    | 545380-34-5  | free base     | TNF-alpha,NF-kB               | 57.3  | -1.23 | 49.0  | -1.34 | 95.3  | -0.13 | 82.6  | -0.32 |
| <b>Quercetin</b>                        | 117-39-5     | free base     | PKC,Src,PI3K,Sirtuin          | 130.6 | 1.87  | 99.3  | 0.48  | 85.8  | -0.54 | 80.4  | -0.39 |
| <b>Quetiapine Fumarate</b>              | 111974-72-2  | fumarate      | Dopamine Receptor             | 113.6 | 1.15  | 114.0 | 1.02  | 108.9 | 0.44  | 115.2 | 0.71  |
| <b>Quinapril HCl</b>                    | 82586-55-8   | hydrochloride | RAAS                          | 94.5  | 0.34  | 56.2  | -1.08 | 129.1 | 1.30  | 110.4 | 0.56  |
| <b>Quisinostat (JNJ-26481585)</b>       | 875320-29-9  | free base     | HDAC                          | 20.3  | -2.80 | 20.6  | -2.38 | 16.4  | -3.49 | 2.5   | -2.86 |
| <b>Quizartinib (AC220)</b>              | 950769-58-1  | free base     | FLT3                          | 77.3  | -0.38 | 93.8  | 0.28  | 109.6 | 0.47  | 87.1  | -0.18 |
| <b>R406</b>                             | 841290-81-1  | besylate      | Syk,FLT3                      | 89.3  | 0.12  | 112.9 | 0.98  | 86.8  | -0.50 | 78.6  | -0.45 |
| <b>R406 (free base)</b>                 | 841290-80-0  | free base     | Syk                           | 87.3  | 0.04  | 114.5 | 1.03  | 106.4 | 0.34  | 86.1  | -0.21 |
| <b>R547</b>                             | 741713-40-6  | free base     | CDK                           | 56.2  | -1.28 | 81.1  | -0.18 | 58.0  | -1.72 | 28.5  | -2.04 |
| <b>Racecadotril</b>                     | 81110-73-8   | free base     | Opioid Receptor               | 88.6  | 0.09  | 56.2  | -1.08 | 145.5 | 2.00  | 99.0  | 0.20  |
| <b>RAF265 (CHIR-265)</b>                | 927880-90-8  | free base     | VEGFR,Raf                     | 92.4  | 0.25  | 59.4  | -0.97 | 82.6  | -0.67 | 59.0  | -1.07 |
| <b>Raloxifene HCl</b>                   | 82640-04-8   | hydrochloride | Estrogen/progestogen Receptor | 102.4 | 0.68  | 109.4 | 0.85  | 127.7 | 1.24  | 73.0  | -0.63 |
| <b>Raltegravir (MK-0518)</b>            | 518048-05-0  | free base     | Integrase                     | 96.4  | 0.42  | 54.2  | -1.16 | 118.0 | 0.83  | 151.5 | 1.86  |
| <b>Ramelteon</b>                        | 196597-26-9  | free base     | MT Receptor                   | 111.3 | 1.05  | 94.3  | 0.30  | 110.3 | 0.50  | 95.5  | 0.09  |
| <b>Ramipril</b>                         | 87333-19-5   | free base     | RAAS                          | 104.7 | 0.78  | 117.1 | 1.13  | 103.2 | 0.20  | 96.9  | 0.13  |

|                                             |              |                 |                                   |       |       |       |       |       |       |       |       |
|---------------------------------------------|--------------|-----------------|-----------------------------------|-------|-------|-------|-------|-------|-------|-------|-------|
| <b>Ranitidine</b>                           | 66357-59-3   | hydrochloride   | Histamine Receptor                | 105.3 | 0.80  | 116.5 | 1.11  | 108.1 | 0.41  | 97.1  | 0.14  |
| <b>Ranolazine 2HCl</b>                      | 95635-56-6   | dihydrochloride | Calcium Channel                   | 80.2  | -0.26 | 78.0  | -0.29 | 102.1 | 0.15  | 98.4  | 0.18  |
| <b>Rapamycin (Sirolimus)</b>                | 53123-88-9   | free base       | Autophagy,mTOR                    | 70.9  | -0.66 | 59.4  | -0.97 | 51.7  | -1.99 | 81.0  | -0.37 |
| <b>Rasagiline Mesylate</b>                  | 161735-79-1  | mesylate        | MAO                               | 96.9  | 0.44  | 116.1 | 1.09  | 93.5  | -0.21 | 130.0 | 1.18  |
| <b>Refametinib (RDEA119, Bay 86-9766)</b>   | 923032-37-5  | free base       | MEK                               |       |       | 33.3  | -1.92 | 38.4  | -2.55 | 104.2 | 0.36  |
| <b>Regorafenib (BAY 73-4506)</b>            | 755037-03-7  | free base       | c-RET,VEGFR                       | 93.4  | 0.30  | 79.8  | -0.22 | 61.4  | -1.57 | 66.4  | -0.84 |
| <b>Repaglinide</b>                          | 135062-02-1  | free base       | Potassium Channel                 | 76.7  | -0.41 | 71.6  | -0.52 | 86.1  | -0.53 | 93.0  | 0.01  |
| <b>RepSox</b>                               | 446859-33-2  | free base       | TGF-beta/Smad                     | 78.1  | -0.35 | 54.5  | -1.14 |       |       | 104.1 | 0.36  |
| <b>Resminostat</b>                          | 864814-88-0  | free base       | HDAC                              | 56.4  | -1.27 | 112.6 | 0.97  | 128.5 | 1.28  | 35.7  | -1.81 |
| <b>Resveratrol</b>                          | 501-36-0     | free base       | Sirtuin,Autophagy                 | 78.3  | -0.34 | 115.4 | 1.07  | 100.1 | 0.07  | 97.5  | 0.15  |
| <b>RG108</b>                                | 48208-26-0   | free base       | Transferase,DNA Methyltransferase | 91.1  | 0.20  | 59.6  | -0.96 | 83.0  | -0.66 | 112.4 | 0.62  |
| <b>RG2833 (RGFP109)</b>                     | 1215493-56-3 | free base       | HDAC                              | 75.8  | -0.45 | 101.3 | 0.56  | 129.3 | 1.31  | 98.0  | 0.17  |
| <b>RGFP966</b>                              | 1396841-57-8 | free base       | HDAC                              | 91.0  | 0.19  | 93.3  | 0.27  |       |       | 120.4 | 0.87  |
| <b>Ridaforolimus (Deforolimus, MK-8669)</b> | 572924-54-0  | free base       | mTOR                              | 66.0  | -0.86 | 67.5  | -0.67 | 72.7  | -1.09 | 63.4  | -0.93 |
| <b>Rigosertib (ON-01910)</b>                | 1225497-78-8 | sodium          | PLK                               | 83.1  | -0.14 | 52.7  | -1.21 | 123.5 | 1.06  | 90.7  | -0.07 |
| <b>Rilpivirine</b>                          | 500287-72-9  | free base       | Reverse Transcriptase             | 73.5  | -0.55 | 82.7  | -0.12 | 72.7  | -1.10 | 71.1  | -0.69 |
| <b>Riluzole</b>                             | 1744-22-5    | free base       | Sodium Channel                    | 88.8  | 0.10  | 114.4 | 1.03  | 101.8 | 0.14  | 89.0  | -0.12 |
| <b>Rimonabant</b>                           | 168273-06-1  | free base       | Cannabinoid Receptor              | 135.9 | 2.10  | 109.1 | 0.84  | 117.0 | 0.79  | 93.2  | 0.01  |
| <b>Risperidone</b>                          | 106266-06-2  | free base       | 5-HT Receptor                     | 82.3  | -0.17 | 114.2 | 1.03  | 104.3 | 0.25  | 77.7  | -0.48 |
| <b>RITA (NSC 652287)</b>                    | 213261-59-7  | free base       | E3 Ligase ,p53                    | 88.5  | 0.09  | 83.6  | -0.09 | 127.7 | 1.24  | 52.3  | -1.28 |
| <b>Ritodrine HCl</b>                        | 23239-51-2   | hydrochloride   | Adrenergic Receptor               | 92.7  | 0.27  | 115.9 | 1.09  | 113.8 | 0.65  | 122.1 | 0.93  |
| <b>Ritonavir</b>                            | 155213-67-5  | free base       | HIV Protease                      | 117.1 | 1.30  | 116.3 | 1.10  | 122.6 | 1.02  | 68.0  | -0.79 |
| <b>Rivaroxaban</b>                          | 366789-02-8  | free base       | Factor Xa                         | 139.0 | 2.23  | 107.3 | 0.77  | 109.1 | 0.45  | 113.3 | 0.65  |
| <b>Rivastigmine Tartrate</b>                | 129101-54-8  | tartrate        | AChR                              | 96.4  | 0.42  | 116.3 | 1.10  | 75.1  | -0.99 | 126.2 | 1.06  |
| <b>Rizatriptan Benzoate</b>                 | 145202-66-0  | benzoate        | 5-HT Receptor                     | 110.7 | 1.03  | 114.7 | 1.04  | 106.7 | 0.35  | 91.7  | -0.03 |
| <b>RKI-1447</b>                             | 1342278-01-6 | free base       | ROCK                              | 70.9  | -0.65 | 86.1  | 0.00  |       |       | 124.5 | 1.00  |
| <b>Ro 31-8220 Mesylate</b>                  | 138489-18-6  | mesylate        | PKC                               | 49.6  | -1.56 | 74.8  | -0.41 |       |       | 40.4  | -1.66 |
| <b>Ro3280</b>                               | 1062243-51-9 | free base       | PLK                               | 54.0  | -1.37 | 58.6  | -1.00 |       |       | 25.0  | -2.15 |

|                                          |              |               |                          |       |       |       |       |       |       |       |       |
|------------------------------------------|--------------|---------------|--------------------------|-------|-------|-------|-------|-------|-------|-------|-------|
| <b>RO4929097</b>                         | 847925-91-1  | free base     | Gamma-secretase          | 106.8 | 0.86  | 115.0 | 1.05  | 101.6 | 0.13  | 76.1  | -0.53 |
| <b>Rocilinostat (ACY-1215)</b>           | 1316214-52-4 | free base     | HDAC                     | 76.6  | -0.41 | 67.6  | -0.67 | 122.9 | 1.04  | 111.6 | 0.59  |
| <b>Rocuronium Bromide</b>                | 119302-91-9  | bromide       | AChR                     | 74.2  | -0.52 | 115.8 | 1.08  | 91.2  | -0.31 | 84.5  | -0.26 |
| <b>Rofecoxib</b>                         | 162011-90-7  | free base     | COX                      | 97.4  | 0.47  | 120.1 | 1.24  | 108.1 | 0.41  | 116.0 | 0.74  |
| <b>Roflumilast</b>                       | 162401-32-3  | free base     | PDE                      | 125.2 | 1.64  | 99.4  | 0.49  | 96.9  | -0.07 | 74.7  | -0.57 |
| <b>Rolipram</b>                          | 61413-54-5   | free base     | PDE                      | 91.9  | 0.23  | 63.3  | -0.83 | 115.0 | 0.70  | 101.5 | 0.27  |
| <b>Roscovitine (Seliciclib,CYC202)</b>   | 186692-46-6  | free base     | CDK                      | 95.5  | 0.39  | 110.6 | 0.90  | 111.1 | 0.54  | 63.5  | -0.93 |
| <b>Rosiglitazone</b>                     | 122320-73-4  | free base     | PPAR                     | 79.3  | -0.30 | 72.3  | -0.50 | 104.0 | 0.23  | 117.9 | 0.80  |
| <b>Rosuvastatin Calcium</b>              | 147098-20-2  | free base     | RAAS                     | 89.9  | 0.15  | 74.6  | -0.42 | 91.0  | -0.32 | 96.9  | 0.13  |
| <b>Rotigotine</b>                        | 99755-59-6   | free base     | Dopamine Receptor        | 106.8 | 0.87  | 116.8 | 1.12  | 89.2  | -0.39 | 94.8  | 0.06  |
| <b>Rotundine</b>                         | 483-14-7     | free base     | Dopamine Receptor        | 107.9 | 0.91  | 111.0 | 0.91  | 80.7  | -0.75 | 111.8 | 0.60  |
| <b>Roxatidine Acetate HCl</b>            | 93793-83-0   | hydrochloride | Histamine Receptor       | 97.3  | 0.46  | 115.7 | 1.08  | 118.3 | 0.84  | 160.5 | 2.14  |
| <b>RS-127445</b>                         | 199864-87-3  | free base     | 5-HT Receptor            | 75.6  | -0.46 | 47.6  | -1.40 | 114.2 | 0.67  | 137.9 | 1.43  |
| <b>Rucaparib (AG-014699,PF-01367338)</b> | 459868-92-9  | phosphate     | PARP                     |       |       | 79.5  | -0.24 | 74.0  | -1.04 | 99.5  | 0.21  |
| <b>Rufinamide</b>                        | 106308-44-5  | free base     | Sodium Channel           | 99.0  | 0.53  | 81.0  | -0.18 | 83.3  | -0.64 | 90.9  | -0.06 |
| <b>Rupatadine Fumarate</b>               | 182349-12-8  | fumarate      | Histamine Receptor       | 116.7 | 1.28  | 103.1 | 0.62  | 113.4 | 0.64  | 130.4 | 1.19  |
| <b>Ruxolitinib (INCB018424)</b>          | 941678-49-5  | free base     | JAK                      | 99.4  | 0.55  | 115.0 | 1.05  | 105.6 | 0.30  | 109.6 | 0.53  |
| <b>RVX-208</b>                           | 1044870-39-4 | free base     | Epigenetic Reader Domain | 134.1 | 2.02  | 93.5  | 0.27  | 100.4 | 0.08  | 88.3  | -0.14 |
| <b>S- (+)-Rolipram</b>                   | 85416-73-5   | free base     | PDE                      | 121.6 | 1.49  | 96.0  | 0.36  | 92.2  | -0.27 | 81.7  | -0.35 |
| <b>S3I-201</b>                           | 501919-59-1  | free base     | STAT                     | 98.3  | 0.50  | 84.7  | -0.05 | 119.5 | 0.89  | 85.9  | -0.22 |
| <b>Sabutoclax</b>                        | 1228108-65-3 | free base     | Bcl-2                    | 85.2  | -0.05 | 88.6  | 0.09  | 100.8 | 0.10  | 72.1  | -0.65 |
| <b>Safinamide Mesylate</b>               | 202825-46-5  | mesylate      | MAO                      | 110.9 | 1.04  | 112.4 | 0.96  | 107.0 | 0.36  | 68.0  | -0.79 |
| <b>Sal003</b>                            | 1164470-53-4 | free base     | ELF2                     | 132.8 | 1.96  | 99.5  | 0.49  | 102.3 | 0.16  | 107.5 | 0.47  |
| <b>SANT-1</b>                            | 304909-07-7  | free base     | Hedgehog/Smoothened      | 93.8  | 0.31  | 105.1 | 0.69  |       |       | 90.9  | -0.06 |
| <b>Santacruzamate A (CAY10683)</b>       | 1477949-42-0 | free base     | HDAC                     | 60.3  | -1.11 | 91.7  | 0.21  | 82.0  | -0.70 | 75.8  | -0.54 |
| <b>SAR131675</b>                         | 1433953-83-3 | free base     | VEGFR                    | 81.0  | -0.23 | 121.6 | 1.29  | 116.0 | 0.74  | 114.4 | 0.68  |
| <b>SAR245409 (XL765)</b>                 | 1349796-36-6 | free base     | PI3K,mTOR                | 89.7  | 0.14  | 56.2  | -1.08 | 111.1 | 0.54  | 97.1  | 0.13  |
| <b>Saracatinib (AZD0530)</b>             | 379231-04-6  | free base     | Src,Bcr-Abl              | 113.4 | 1.14  | 111.0 | 0.91  | 91.9  | -0.28 | 108.9 | 0.51  |
| <b>Saxagliptin</b>                       | 361442-04-8  | free base     | DPP-4                    | 92.3  | 0.25  | 115.5 | 1.07  | 106.3 | 0.33  | 99.2  | 0.20  |

|                                |              |               |                           |       |       |       |       |       |       |       |       |
|--------------------------------|--------------|---------------|---------------------------|-------|-------|-------|-------|-------|-------|-------|-------|
| <b>SB202190 (FHPI)</b>         | 152121-30-7  | free base     | p38 MAPK                  |       |       | 72.0  | -0.51 | 92.1  | -0.27 | 79.0  | -0.44 |
| <b>SB203580</b>                | 152121-47-6  | free base     | p38 MAPK                  | 78.1  | -0.35 | 111.3 | 0.92  | 118.3 | 0.84  | 78.0  | -0.47 |
| <b>SB216763</b>                | 280744-09-4  | free base     | GSK-3                     | 92.3  | 0.25  | 113.2 | 0.99  | 93.0  | -0.23 | 85.1  | -0.25 |
| <b>SB269970 HCl</b>            | 261901-57-9  | hydrochloride | 5-HT Receptor             | 74.4  | -0.51 | 115.0 | 1.05  | 117.6 | 0.81  | 109.2 | 0.52  |
| <b>SB271046</b>                | 209481-20-9  | free base     | 5-HT Receptor             | 93.6  | 0.30  | 114.9 | 1.05  | 90.9  | -0.32 | 127.7 | 1.11  |
| <b>SB-3CT</b>                  | 292605-14-2  | free base     | MMP                       | 82.8  | -0.15 | 77.2  | -0.32 | 93.4  | -0.22 | 72.6  | -0.64 |
| <b>SB408124</b>                | 288150-92-5  | free base     | OX Receptor               | 119.2 | 1.39  | 56.8  | -1.06 | 109.6 | 0.47  | 96.3  | 0.11  |
| <b>SB415286</b>                | 264218-23-7  | free base     | GSK-3                     | 87.3  | 0.04  | 113.2 | 0.99  | 113.1 | 0.62  | 123.9 | 0.98  |
| <b>SB431542</b>                | 301836-41-9  | free base     | TGF-beta/Smad             | 87.8  | 0.06  | 91.6  | 0.20  | 84.5  | -0.59 | 107.0 | 0.45  |
| <b>SB505124</b>                | 694433-59-5  | free base     | TGF-beta/Smad             | 102.6 | 0.69  | 59.5  | -0.96 | 95.1  | -0.14 | 92.9  | 0.00  |
| <b>SB525334</b>                | 356559-20-1  | free base     | TGF-beta/Smad             | 101.4 | 0.64  | 105.6 | 0.71  | 116.6 | 0.77  | 75.6  | -0.55 |
| <b>SB590885</b>                | 405554-55-4  | free base     | Raf                       | 122.0 | 1.51  | 74.4  | -0.42 | 108.6 | 0.43  | 131.4 | 1.22  |
| <b>SB705498</b>                | 501951-42-4  | free base     | TRPV                      | 76.1  | -0.44 | 111.6 | 0.93  | 106.7 | 0.35  | 98.3  | 0.17  |
| <b>SB742457</b>                | 607742-69-8  | free base     | 5-HT Receptor             | 90.1  | 0.15  | 78.7  | -0.27 | 126.8 | 1.20  | 111.8 | 0.60  |
| <b>SB743921</b>                | 940929-33-9  | hydrochloride | Kinesin                   | 72.4  | -0.59 | 54.8  | -1.14 | 41.3  | -2.43 | 55.5  | -1.18 |
| <b>SC-514</b>                  | 354812-17-2  | free base     | IκB/IKK                   | 87.0  | 0.03  | 69.4  | -0.60 | 84.2  | -0.61 | 109.8 | 0.54  |
| <b>SC75741</b>                 | 913822-46-5  | free base     | NF-κB                     | 67.6  | -0.80 | 74.9  | -0.40 | 110.1 | 0.50  | 71.1  | -0.69 |
| <b>Scopine</b>                 | 498-45-3     | free base     | Adrenergic Receptor       | 81.2  | -0.22 | 116.7 | 1.12  | 120.5 | 0.94  | 147.5 | 1.73  |
| <b>Scopolamine HBr</b>         | 114-49-8     | hydrobromide  | AChR                      | 79.9  | -0.28 | 116.6 | 1.11  | 123.3 | 1.05  | 97.7  | 0.15  |
| <b>Scriptaid</b>               | 287383-59-9  | free base     | HDAC                      | 71.5  | -0.63 | 64.7  | -0.77 | 102.2 | 0.16  | 53.7  | -1.24 |
| <b>Selumetinib (AZD6244)</b>   | 606143-52-6  | free base     | MEK                       | 121.5 | 1.48  | 106.5 | 0.75  | 48.4  | -2.13 | 83.0  | -0.31 |
| <b>Semagacestat (LY450139)</b> | 425386-60-3  | free base     | Gamma-secretase           | 87.0  | 0.03  | 115.7 | 1.08  | 122.4 | 1.01  | 92.4  | -0.01 |
| <b>Semaxanib (SU5416)</b>      | 194413-58-6  | free base     | VEGFR                     | 83.4  | -0.13 | 54.5  | -1.15 | 119.4 | 0.89  | 100.8 | 0.25  |
| <b>Sertraline HCl</b>          | 79559-97-0   | hydrochloride | 5-HT Receptor             | 106.9 | 0.87  | 59.7  | -0.96 | 98.3  | -0.01 | 128.2 | 1.12  |
| <b>SF1670</b>                  | 345630-40-2  | free base     | Others                    | 82.6  | -0.16 | 90.3  | 0.16  | 114.3 | 0.67  | 95.1  | 0.07  |
| <b>SGC 0946</b>                | N/A          | free base     | Histone Methyltransferase | 91.6  | 0.22  | 88.0  | 0.07  | 90.6  | -0.33 | 110.4 | 0.56  |
| <b>SGC-CBP30</b>               | N/A          | free base     | Epigenetic Reader Domain  | 75.5  | -0.46 | 101.2 | 0.55  |       |       | 104.1 | 0.36  |
| <b>SGI-1027</b>                | 1020149-73-8 | free base     | DNA Methyltransferase     | 81.2  | -0.22 | 98.0  | 0.44  | 103.1 | 0.20  | 5.1   | -2.78 |
| <b>SGI-1776 free base</b>      | 1025065-69-3 | free base     | Pim                       | 83.5  | -0.12 | 75.3  | -0.39 | 83.7  | -0.63 | 93.1  | 0.01  |

|                                          |              |               |                          |       |       |       |       |       |       |       |       |
|------------------------------------------|--------------|---------------|--------------------------|-------|-------|-------|-------|-------|-------|-------|-------|
| <b>SGX-523</b>                           | 1022150-57-7 | free base     | c-Met                    | 107.2 | 0.88  | 100.8 | 0.54  | 74.8  | -1.01 | 96.2  | 0.11  |
| <b>SH-4-54</b>                           | 1456632-40-8 | free base     | STAT                     | 81.6  | -0.20 | 57.0  | -1.05 | 104.9 | 0.27  | 99.1  | 0.20  |
| <b>Sildenafil Citrate</b>                | 171599-83-0  | citrate       | PDE                      | 102.1 | 0.66  | 115.8 | 1.08  | 101.5 | 0.13  | 83.6  | -0.29 |
| <b>Silodosin</b>                         | 160970-54-7  | free base     | Adrenergic Receptor      | 84.5  | -0.08 | 114.0 | 1.02  | 113.5 | 0.64  | 96.6  | 0.12  |
| <b>Sirtinol</b>                          | 410536-97-9  | free base     | Sirtuin                  | 88.1  | 0.07  | 114.6 | 1.04  | 110.0 | 0.49  | 80.5  | -0.39 |
| <b>Sitagliptin phosphate monohydrate</b> | 654671-77-9  | phosphate     | DPP-4                    | 93.4  | 0.30  | 94.3  | 0.30  | 100.6 | 0.09  | 117.9 | 0.80  |
| <b>Sitaxentan sodium</b>                 | 210421-74-2  | free base     | Endothelin Receptor      | 99.6  | 0.56  | 89.2  | 0.12  | 113.8 | 0.65  | 96.0  | 0.10  |
| <b>Skepinone-L</b>                       | 1221485-83-1 | free base     | p38 MAPK                 | 66.3  | -0.85 | 52.3  | -1.22 |       |       | 94.0  | 0.04  |
| <b>SKI II</b>                            | 312636-16-1  | free base     | S1P Receptor             | 80.8  | -0.24 | 56.0  | -1.09 |       |       | 126.9 | 1.08  |
| <b>SKLB1002</b>                          | 1225451-84-2 | free base     | VEGFR                    | 84.4  | -0.08 | 57.3  | -1.04 |       |       | 103.9 | 0.35  |
| <b>SL-327</b>                            | 305350-87-2  | free base     | MEK                      | 75.2  | -0.47 | 104.4 | 0.67  | 94.9  | -0.15 | 108.2 | 0.49  |
| <b>SMI-4a</b>                            | 438190-29-5  | free base     | Pim                      | 76.0  | -0.44 | 72.1  | -0.51 | 101.5 | 0.13  | 84.0  | -0.28 |
| <b>SN-38</b>                             | 86639-52-3   | free base     | Topoisomerase            | 3.5   | -3.51 | 32.3  | -1.95 | 61.7  | -1.56 | 4.2   | -2.81 |
| <b>SNS-032 (BMS-387032)</b>              | 345627-80-7  | free base     | CDK                      | 52.6  | -1.43 | 36.6  | -1.80 | 27.8  | -3.00 | 11.0  | -2.59 |
| <b>SNS-314 Mesylate</b>                  | 1146618-41-8 | mesylate      | Aurora Kinase            | 58.0  | -1.20 | 65.3  | -0.75 | 75.0  | -1.00 | 69.9  | -0.73 |
| <b>SNX-2112 (PF-04928473)</b>            | 908112-43-6  | free base     | HSP (e.g. HSP90)         | 51.3  | -1.49 | 36.8  | -1.79 | 40.4  | -2.47 | 50.2  | -1.35 |
| <b>Sodium 4-Aminosalicylate</b>          | 6018-19-5    | sodium        | NF-kB                    | 96.3  | 0.42  | 118.5 | 1.18  | 106.0 | 0.32  | 132.6 | 1.26  |
| <b>Sodium Danshensu</b>                  | 67920-52-9   | sodium        | Others,P450 (e.g. CYP17) | 110.0 | 1.00  | 77.4  | -0.31 | 105.2 | 0.29  | 106.8 | 0.44  |
| <b>Sodium Phenylbutyrate</b>             | 1716-12-7    | free base     | HDAC                     | 91.7  | 0.22  | 98.2  | 0.44  | 83.7  | -0.63 | 89.1  | -0.12 |
| <b>Sofosbuvir (PSI-7977, GS-7977)</b>    | 1190307-88-0 | free base     | DNA/RNA Synthesis        | 104.2 | 0.75  | 104.5 | 0.67  | 101.8 | 0.14  | 90.5  | -0.07 |
| <b>Solifenacin succinate</b>             | 242478-38-2  | succinate     | AChR                     | 81.4  | -0.21 | 80.7  | -0.19 | 113.0 | 0.62  | 89.4  | -0.11 |
| <b>Sorafenib</b>                         | 284461-73-0  | free base     | Raf                      | 84.4  | -0.09 | 116.2 | 1.10  | 74.5  | -1.02 | 97.2  | 0.14  |
| <b>Sorafenib Tosylate</b>                | 475207-59-1  | tosylate      | PDGFR,Raf,VEGFR          | 97.8  | 0.48  | 113.7 | 1.01  | 77.3  | -0.90 | 91.1  | -0.05 |
| <b>Sotalol</b>                           | 959-24-0     | hydrochloride | Adrenergic Receptor      | 89.0  | 0.11  | 116.2 | 1.10  | 125.1 | 1.13  | 137.5 | 1.41  |
| <b>Sotrastaurin</b>                      | 425637-18-9  | free base     | PKC                      | 87.2  | 0.03  | 104.1 | 0.66  | 92.7  | -0.25 | 72.7  | -0.64 |
| <b>SP600125</b>                          | 129-56-6     | free base     | JNK                      | 86.8  | 0.02  | 115.0 | 1.05  | 100.0 | 0.07  | 94.0  | 0.04  |
| <b>Spironolactone</b>                    | 52-01-7      | free base     | Androgen Receptor        | 95.1  | 0.37  | 57.3  | -1.04 | 99.1  | 0.03  | 122.7 | 0.95  |
| <b>SRT1720</b>                           | 1001645-58-4 | hydrochloride | Sirtuin                  | 89.4  | 0.13  | 113.2 | 0.99  | 86.0  | -0.53 | 62.1  | -0.97 |
| <b>S-Ruxolitinib (INCB018424)</b>        | 941685-37-6  | free base     | JAK                      | 74.3  | -0.51 | 54.9  | -1.13 | 83.6  | -0.63 | 99.7  | 0.22  |

|                              |              |               |                                          |       |       |       |       |       |       |       |       |
|------------------------------|--------------|---------------|------------------------------------------|-------|-------|-------|-------|-------|-------|-------|-------|
| <b>SSR128129E</b>            | 848318-25-2  | free base     | FGFR                                     | 71.2  | -0.64 | 61.8  | -0.88 |       |       | 113.0 | 0.64  |
| <b>Stattic</b>               | 19983-44-9   | free base     | STAT                                     | 92.2  | 0.24  | 117.1 | 1.13  | 83.4  | -0.64 | 93.0  | 0.01  |
| <b>Stavudine (d4T)</b>       | 3056-17-5    | free base     | Reverse Transcriptase                    | 88.9  | 0.10  | 49.7  | -1.32 | 106.8 | 0.35  | 78.5  | -0.45 |
| <b>SU11274</b>               | 658084-23-2  | free base     | c-Met                                    | 80.1  | -0.27 | 92.9  | 0.25  | 71.8  | -1.13 | 127.0 | 1.08  |
| <b>Sulfacetamide Sodium</b>  | 127-56-0     | sodium        | Autophagy                                | 103.6 | 0.73  | 116.1 | 1.09  | 109.1 | 0.45  | 97.7  | 0.16  |
| <b>Sumatriptan Succinate</b> | 103628-48-4  | succinate     | 5-HT Receptor                            | 91.5  | 0.22  | 99.6  | 0.49  | 97.9  | -0.02 | 76.0  | -0.53 |
| <b>Sunitinib Malate</b>      | 341031-54-7  | malate        | VEGFR,PDGFR,c-Kit                        | 53.0  | -1.41 | 109.8 | 0.86  | 83.6  | -0.63 | 139.8 | 1.49  |
| <b>Suvorexant (MK-4305)</b>  | 1030377-33-3 | free base     | OX Receptor                              | 80.4  | -0.25 | 117.0 | 1.13  | 106.8 | 0.35  | 101.4 | 0.27  |
| <b>Synephrine</b>            | 94-07-5      | free base     | Adrenergic Receptor                      | 93.3  | 0.29  | 80.2  | -0.21 | 91.7  | -0.29 | 124.8 | 1.01  |
| <b>Synephrine HCl</b>        | 5985-28-4    | hydrochloride | Adrenergic Receptor                      | 108.9 | 0.95  | 68.8  | -0.63 | 77.8  | -0.88 | 111.6 | 0.60  |
| <b>T0070907</b>              | 313516-66-4  | free base     | PPAR                                     | 88.9  | 0.10  | 100.1 | 0.51  | 125.5 | 1.15  | 116.8 | 0.76  |
| <b>T0901317</b>              | 293754-55-9  | free base     | Liver X Receptor                         | 98.1  | 0.50  | 62.6  | -0.85 | 88.4  | -0.43 | 120.2 | 0.87  |
| <b>Tadalafil</b>             | 171596-29-5  | free base     | PDE                                      | 94.7  | 0.35  | 115.7 | 1.08  | 110.3 | 0.50  | 98.1  | 0.17  |
| <b>TAE226 (NVP-TAE226)</b>   | 761437-28-9  | free base     | FAK                                      | 32.9  | -2.27 | 38.0  | -1.74 | 61.9  | -1.55 | 77.6  | -0.48 |
| <b>TAK-285</b>               | 871026-44-7  | free base     | EGFR,HER2                                | 106.7 | 0.86  | 72.8  | -0.48 | 118.5 | 0.85  | 107.9 | 0.48  |
| <b>TAK-438</b>               | 1260141-27-2 | fumarate      | Potassium Channel                        | 66.9  | -0.83 | 71.5  | -0.53 | 107.4 | 0.38  | 111.4 | 0.59  |
| <b>TAK-632</b>               | 1228591-30-7 | free base     | Raf                                      | 81.3  | -0.22 | 98.2  | 0.44  | 60.4  | -1.62 | 108.5 | 0.50  |
| <b>TAK-700 (Orteronel)</b>   | 426219-18-3  | free base     | P450 (e.g. CYP17)                        | 97.5  | 0.47  | 103.2 | 0.62  | 111.0 | 0.53  | 67.4  | -0.80 |
| <b>TAK-715</b>               | 303162-79-0  | free base     | p38 MAPK                                 | 80.6  | -0.25 | 112.9 | 0.98  | 92.1  | -0.27 | 93.7  | 0.03  |
| <b>TAK-733</b>               | 1035555-63-5 | free base     | MEK                                      | 86.1  | -0.01 | 22.8  | -2.30 | 65.8  | -1.39 | 87.2  | -0.18 |
| <b>TAK-875</b>               | 1374598-80-7 | hydrate       | GPR                                      | 89.1  | 0.11  | 113.5 | 1.00  | 104.5 | 0.26  | 116.7 | 0.76  |
| <b>TAK-901</b>               | 934541-31-8  | free base     | Aurora Kinase                            | 40.8  | -1.93 | 86.4  | 0.01  | 43.3  | -2.34 | 50.8  | -1.33 |
| <b>TAME</b>                  | 901-47-3     | free base     | E3 Ligase ,APC                           | 111.1 | 1.05  | 66.3  | -0.72 | 86.0  | -0.53 | 128.7 | 1.14  |
| <b>Tamoxifen Citrate</b>     | 54965-24-1   | citrate       | Estrogen/progestogen Receptor, Autophagy | 98.8  | 0.53  | 100.5 | 0.53  | 128.9 | 1.29  | 165.6 | 2.31  |
| <b>Tandutinib (MLN518)</b>   | 387867-13-2  | free base     | FLT3                                     | 79.0  | -0.31 | 87.5  | 0.05  | 120.0 | 0.92  | 97.1  | 0.14  |
| <b>TAPI-1</b>                | 171235-71-5  | free base     | Others                                   | 79.1  | -0.31 | 77.7  | -0.30 | 99.1  | 0.03  | 122.0 | 0.93  |
| <b>Tarividar</b>             | 206873-63-4  | free base     | P-gp                                     | 64.1  | -0.94 | 61.1  | -0.91 | 96.7  | -0.07 | 110.7 | 0.57  |
| <b>Tasisulam</b>             | 519055-62-0  | free base     | Caspase                                  | 75.1  | -0.48 | 93.8  | 0.28  | 96.9  | -0.07 | 73.6  | -0.61 |

|                                                 |               |               |                       |       |       |       |       |       |       |       |       |
|-------------------------------------------------|---------------|---------------|-----------------------|-------|-------|-------|-------|-------|-------|-------|-------|
| <b>TCID</b>                                     | 30675-13-9    | free base     | DUB                   | 79.2  | -0.30 | 93.9  | 0.29  |       |       | 110.8 | 0.57  |
| <b>TCS 359</b>                                  | 301305-73-7   | free base     | FLT3                  | 98.8  | 0.53  | 68.7  | -0.63 | 109.3 | 0.46  | 81.1  | -0.37 |
| <b>Telaprevir (VX-950)</b>                      | 402957-28-2   | free base     | HCV Protease          | 112.4 | 1.10  | 115.5 | 1.07  | 111.4 | 0.55  | 87.0  | -0.19 |
| <b>Telatinib</b>                                | 332012-40-5   | free base     | VEGFR,PDGFR,c-Kit     | 109.0 | 0.96  | 61.4  | -0.90 | 98.2  | -0.01 | 107.3 | 0.46  |
| <b>Telmisartan</b>                              | 144701-48-4   | free base     | RAAS                  | 99.5  | 0.55  | 113.2 | 0.99  | 98.0  | -0.02 | 96.2  | 0.11  |
| <b>Telotristat Etiprate (LX 1606 Hippurate)</b> | 11137608-69-5 | Salt          | Hydroxylase           | 103.8 | 0.74  | 54.5  | -1.14 | 92.1  | -0.27 | 84.7  | -0.26 |
| <b>Temocapril HCl</b>                           | 110221-44-8   | hydrochloride | RAAS                  | 101.8 | 0.65  | 115.7 | 1.08  | 97.8  | -0.03 | 131.0 | 1.21  |
| <b>Temozolomide</b>                             | 85622-93-1    | free base     | Autophagy             | 111.6 | 1.07  | 76.6  | -0.34 | 108.2 | 0.41  | 85.8  | -0.22 |
| <b>Temsirolimus (CCI-779, NSC 683864)</b>       | 162635-04-3   | free base     | mTOR                  | 65.6  | -0.88 | 50.8  | -1.28 | 59.6  | -1.65 | 74.3  | -0.59 |
| <b>Tenofovir Disoproxil Fumarate</b>            | 202138-50-9   | fumarate      | Reverse Transcriptase | 96.5  | 0.43  | 115.6 | 1.07  | 94.9  | -0.15 | 78.1  | -0.47 |
| <b>Tenovin-1</b>                                | 380315-80-0   | free base     | p53,E3 Ligase         | 82.0  | -0.19 | 68.4  | -0.64 | 103.7 | 0.22  | 105.1 | 0.39  |
| <b>Tenovin-6</b>                                | 1011557-82-6  | free base     | p53                   | 77.5  | -0.38 | 116.7 | 1.12  | 109.3 | 0.46  | 111.9 | 0.61  |
| <b>Terazosin HCl</b>                            | 70024-40-7    | hydrochloride | Adrenergic Receptor   | 88.2  | 0.07  | 69.9  | -0.58 | 99.8  | 0.06  | 117.5 | 0.78  |
| <b>Tetracaine HCl</b>                           | 136-47-0      | hydrochloride | Calcium Channel       | 99.2  | 0.54  | 113.9 | 1.02  | 145.3 | 1.99  | 106.4 | 0.43  |
| <b>Tetrahydrozoline HCl</b>                     | 522-48-5      | free base     | Adrenergic Receptor   | 92.6  | 0.26  | 105.0 | 0.69  | 106.8 | 0.35  | 92.8  | 0.00  |
| <b>Tetrandrine</b>                              | 518-34-3      | free base     | Calcium Channel       | 114.1 | 1.17  | 113.0 | 0.98  | 88.3  | -0.43 | 81.4  | -0.36 |
| <b>TG003</b>                                    | 300801-52-9   | free base     | CDK                   | 71.6  | -0.63 | 117.3 | 1.14  | 92.2  | -0.27 | 67.5  | -0.80 |
| <b>TG100-115</b>                                | 677297-51-7   | free base     | PI3K                  | 88.2  | 0.08  | 51.3  | -1.26 | 131.6 | 1.41  | 101.6 | 0.28  |
| <b>TG100713</b>                                 | 925705-73-3   | free base     | PI3K                  | 98.9  | 0.53  | 94.8  | 0.32  | 111.6 | 0.56  | 103.7 | 0.35  |
| <b>TG101209</b>                                 | 936091-14-4   | free base     | JAK,FLT3,c-RET        | 51.7  | -1.47 | 104.4 | 0.67  | 91.8  | -0.28 | 52.7  | -1.27 |
| <b>TG101348 (SAR302503)</b>                     | 936091-26-8   | free base     | JAK                   | 42.8  | -1.85 | 112.1 | 0.95  | 86.6  | -0.50 | 54.7  | -1.21 |
| <b>TGX-221</b>                                  | 663619-89-4   | free base     | PI3K                  | 88.6  | 0.09  | 75.1  | -0.40 | 112.3 | 0.59  | 64.6  | -0.89 |
| <b>Thalidomide</b>                              | 50-35-1       | free base     | TNF-alpha,E3 Ligase   | 97.4  | 0.47  | 101.7 | 0.57  | 106.0 | 0.32  | 104.7 | 0.38  |
| <b>Thiazovivin</b>                              | 1226056-71-8  | free base     | ROCK                  | 94.6  | 0.35  | 68.1  | -0.65 | 104.6 | 0.26  | 89.3  | -0.11 |
| <b>Tianeptine sodium</b>                        | 30123-17-2    | sodium        | 5-HT Receptor         | 97.8  | 0.48  | 49.1  | -1.34 | 114.7 | 0.69  | 68.1  | -0.78 |
| <b>TIC10</b>                                    | 41276-02-2    | free base     | Akt                   | 86.2  | -0.01 | 63.0  | -0.84 |       |       | 125.3 | 1.03  |
| <b>Ticagrelor</b>                               | 274693-27-5   | free base     | P2 Receptor           | 98.7  | 0.52  | 117.0 | 1.13  | 94.5  | -0.17 | 102.3 | 0.30  |
| <b>Tie2 kinase inhibitor</b>                    | 948557-43-5   | free base     | Tie-2                 | 111.7 | 1.07  | 82.8  | -0.12 | 118.3 | 0.84  | 93.3  | 0.02  |

|                                            |              |               |                               |       |       |       |       |       |       |       |       |
|--------------------------------------------|--------------|---------------|-------------------------------|-------|-------|-------|-------|-------|-------|-------|-------|
| <b>Timolol Maleate</b>                     | 26921-17-5   | maleate       | Adrenergic Receptor           | 86.3  | 0.00  | 117.5 | 1.15  | 93.0  | -0.23 | 121.9 | 0.92  |
| <b>Tiotropium Bromide hydrate</b>          | 139404-48-1  | hydrate       | AChR                          | 81.0  | -0.23 | 57.6  | -1.03 | 118.8 | 0.86  | 124.7 | 1.01  |
| <b>Tioxolone</b>                           | 4991-65-5    | free base     | Carbonic Anhydrase            | 92.9  | 0.27  | 108.5 | 0.82  | 140.8 | 1.80  | 129.6 | 1.16  |
| <b>Tipifarnib</b>                          | 192185-72-1  | free base     | Transferase                   | 70.3  | -0.68 | 106.4 | 0.74  | 65.6  | -1.40 | 53.2  | -1.26 |
| <b>Tivozanib (AV-951)</b>                  | 475108-18-0  | free base     | VEGFR,PDGFR,c-Kit             | 80.0  | -0.27 | 114.8 | 1.05  | 130.5 | 1.36  | 90.0  | -0.09 |
| <b>Tizanidine HCl</b>                      | 64461-82-1   | hydrochloride | Adrenergic Receptor           | 112.0 | 1.08  | 56.0  | -1.09 | 130.1 | 1.34  | 79.5  | -0.42 |
| <b>TMP269</b>                              | 1314890-29-3 | free base     | HDAC                          | 86.1  | -0.01 | 117.9 | 1.16  | 73.2  | -1.07 | 77.0  | -0.50 |
| <b>Tofacitinib (CP-690550) Citrate</b>     | 540737-29-9  | citrate       | JAK                           | 86.8  | 0.02  | 97.1  | 0.40  | 75.7  | -0.97 | 123.7 | 0.98  |
| <b>Tofacitinib (CP-690550,Tasocitinib)</b> | 477600-75-2  | free base     | JAK                           | 95.3  | 0.38  | 81.8  | -0.15 | 94.3  | -0.18 | 109.4 | 0.52  |
| <b>Tolazoline HCl</b>                      | 59-97-2      | free base     | Adrenergic Receptor           | 83.8  | -0.11 | 117.7 | 1.15  | 76.4  | -0.94 | 117.2 | 0.77  |
| <b>Tolbutamide</b>                         | 64-77-7      | free base     | Potassium Channel             | 121.1 | 1.47  | 67.2  | -0.68 | 91.3  | -0.30 | 118.6 | 0.82  |
| <b>Tolcapone</b>                           | 134308-13-7  | free base     | Transferase                   | 88.5  | 0.09  | 117.8 | 1.16  | 101.0 | 0.11  | 120.6 | 0.88  |
| <b>Tolfenamic Acid</b>                     | 13710-19-5   | free base     | COX                           | 89.9  | 0.15  | 68.1  | -0.65 | 103.6 | 0.22  | 91.7  | -0.03 |
| <b>Tolterodine tartrate</b>                | 124937-52-6  | tartrate      | AChR                          | 100.2 | 0.58  | 115.4 | 1.07  | 125.1 | 1.13  | 138.4 | 1.44  |
| <b>Tolvaptan</b>                           | 150683-30-0  | free base     | Vasopressin Receptor          | 78.9  | -0.32 | 116.7 | 1.12  | 112.5 | 0.60  | 121.3 | 0.90  |
| <b>Topiramate</b>                          | 97240-79-4   | free base     | Carbonic Anhydrase            | 102.5 | 0.68  | 72.7  | -0.48 | 107.1 | 0.37  | 71.8  | -0.67 |
| <b>Topotecan HCl</b>                       | 119413-54-6  | hydrochloride | Topoisomerase                 | 47.1  | -1.66 | 54.4  | -1.15 | 95.5  | -0.13 | 7.9   | -2.69 |
| <b>Torcetrapib</b>                         | 262352-17-0  | free base     | CETP                          | 98.9  | 0.53  | 90.0  | 0.15  | 98.7  | 0.01  | 101.9 | 0.29  |
| <b>Toremifene Citrate</b>                  | 89778-27-8   | citrate       | Estrogen/progestogen Receptor | 125.7 | 1.66  | 98.1  | 0.44  | 121.2 | 0.97  | 104.1 | 0.36  |
| <b>Torin 2</b>                             | 1223001-51-1 | free base     | ATM/ATR,mTOR                  | 40.2  | -1.96 | 35.1  | -1.85 | 57.7  | -1.73 | 8.8   | -2.66 |
| <b>TPCA-1</b>                              | 507475-17-4  | free base     | IκB/IKK                       | 71.0  | -0.65 | 114.5 | 1.04  | 119.5 | 0.89  | 96.2  | 0.11  |
| <b>Trametinib (GSK1120212)</b>             | 871700-17-3  | free base     | MEK                           | 72.1  | -0.61 | 36.4  | -1.80 | 60.2  | -1.63 | 106.9 | 0.45  |
| <b>Tranylcypromine (2-PCPA) HCl</b>        | 4548-34-9    | hydrochloride | Histone demethylases          | 80.9  | -0.23 | 62.7  | -0.85 | 79.8  | -0.79 | 100.3 | 0.24  |
| <b>Trelagliptin</b>                        | 865759-25-7  | free base     | DDP-4                         | 83.8  | -0.11 | 67.1  | -0.69 | 79.2  | -0.82 | 114.1 | 0.68  |
| <b>Triamterene</b>                         | 396-01-0     | free base     | Sodium Channel                | 93.2  | 0.29  | 102.8 | 0.61  | 99.5  | 0.04  | 109.5 | 0.53  |
| <b>Triapine</b>                            | 200933-27-3  | free base     | ribonucleotide reductase      | 78.3  | -0.34 | 116.3 | 1.10  | 89.8  | -0.37 | 25.7  | -2.12 |
| <b>Trichostatin A (TSA)</b>                | 58880-19-6   | free base     | HDAC                          | 52.2  | -1.45 | 47.0  | -1.42 | 38.2  | -2.56 | 2.0   | -2.88 |
| <b>Triciribine</b>                         | 35943-35-2   | free base     | Akt                           | 79.8  | -0.28 | 116.5 | 1.11  | 118.7 | 0.86  | 52.8  | -1.27 |



|                                          |              |               |                           |       |       |       |       |       |       |       |       |
|------------------------------------------|--------------|---------------|---------------------------|-------|-------|-------|-------|-------|-------|-------|-------|
| <b>Trifluoperazine 2HCl</b>              | 440-17-5     | 2HCl          | Autophagy                 | 96.9  | 0.45  | 117.4 | 1.14  | 132.5 | 1.44  | 135.3 | 1.35  |
| <b>Triflusal</b>                         | 322-79-2     | free base     | COX                       | 91.6  | 0.22  | 118.0 | 1.16  | 93.7  | -0.20 | 130.1 | 1.18  |
| <b>Trilostane</b>                        | 13647-35-3   | free base     | Dehydrogenase             | 78.0  | -0.36 | 115.9 | 1.09  | 102.9 | 0.19  | 89.7  | -0.10 |
| <b>Trimebutine</b>                       | 39133-31-8   | free base     | Opioid Receptor           | 101.8 | 0.65  | 115.3 | 1.06  | 95.2  | -0.14 | 126.2 | 1.06  |
| <b>Tripelennamine HCl</b>                | 154-69-8     | hydrochloride | Histamine Receptor        | 87.3  | 0.04  | 118.3 | 1.17  | 115.0 | 0.70  | 108.0 | 0.48  |
| <b>Tropicamide</b>                       | 1508-75-4    | free base     | AChR                      | 94.7  | 0.35  | 116.3 | 1.10  | 109.4 | 0.46  | 156.7 | 2.02  |
| <b>Tropisetron</b>                       | 105826-92-4  | hydrochloride | 5-HT Receptor             | 101.1 | 0.62  | 117.0 | 1.13  | 106.8 | 0.35  | 90.4  | -0.08 |
| <b>Trospium chloride</b>                 | 10405-02-4   | chloride      | AChR                      | 80.1  | -0.27 | 96.8  | 0.39  | 122.0 | 1.00  | 92.9  | 0.00  |
| <b>TSU-68 (SU6668, Orantinib)</b>        | 252916-29-3  | free base     | VEGFR,PDGFR,FGFR          | 100.6 | 0.60  | 67.0  | -0.69 | 127.8 | 1.25  | 72.3  | -0.65 |
| <b>Tubacin</b>                           | 537049-40-4  | free base     | HDAC                      | 106.3 | 0.84  | 54.6  | -1.14 | 77.6  | -0.89 | 97.6  | 0.15  |
| <b>Tubastatin A</b>                      | 1252003-15-8 | free base     | HDAC                      | 62.3  | -1.02 | 61.7  | -0.88 | 111.1 | 0.54  | 81.4  | -0.36 |
| <b>Tubastatin A HCl</b>                  | 1310693-92-5 | hydrochloride | HDAC                      | 71.4  | -0.64 | 115.7 | 1.08  | 107.6 | 0.39  | 103.3 | 0.33  |
| <b>TW-37</b>                             | 877877-35-5  | free base     | Bcl-2                     | 103.5 | 0.72  | 106.1 | 0.73  | 109.2 | 0.46  | 85.6  | -0.23 |
| <b>TWS119</b>                            | 601514-19-6  | free base     | GSK-3                     | 102.4 | 0.68  | 115.6 | 1.08  | 101.7 | 0.14  | 83.3  | -0.30 |
| <b>Tyrphostin 9</b>                      | 10537-47-0   | free base     | EGFR                      | 49.9  | -1.55 | 49.4  | -1.33 | 109.2 | 0.46  | 93.4  | 0.02  |
| <b>Tyrphostin AG 1296</b>                | 146535-11-7  | free base     | FGFR,c-Kit,PDGFR          | 88.9  | 0.11  | 70.8  | -0.55 | 81.1  | -0.74 | 96.2  | 0.11  |
| <b>Tyrphostin AG 879</b>                 | 148741-30-4  | free base     | HER2                      | 73.5  | -0.55 | 68.8  | -0.63 | 102.3 | 0.16  | 109.2 | 0.52  |
| <b>U0126-EtOH</b>                        | 1173097-76-1 | ethanolat     | MEK                       | 86.6  | 0.01  | 66.6  | -0.71 | 73.5  | -1.06 | 77.6  | -0.48 |
| <b>U-104</b>                             | 178606-66-1  | free base     | Carbonic Anhydrase        | 84.3  | -0.09 | 46.1  | -1.45 | 102.9 | 0.19  | 100.8 | 0.25  |
| <b>UK 383367</b>                         | 348622-88-8  | free base     | Procollagen C Proteinase  | 104.4 | 0.76  | 88.9  | 0.11  | 90.5  | -0.34 | 135.8 | 1.36  |
| <b>UNC1215</b>                           | 1415800-43-9 | free base     | Epigenetic Reader Domain  | 97.6  | 0.47  | 80.1  | -0.21 |       |       | 98.3  | 0.17  |
| <b>UNC1999</b>                           | 1431612-23-5 | free base     | Histone Methyltransferase | 77.9  | -0.36 | 70.8  | -0.55 |       |       | 111.4 | 0.59  |
| <b>UNC2881</b>                           | 1493764-08-1 | free base     | Others                    | 75.9  | -0.44 | 117.5 | 1.14  | 88.3  | -0.43 | 79.4  | -0.43 |
| <b>UNC669</b>                            | 1314241-44-5 | free base     | MBT                       | 73.5  | -0.55 | 116.8 | 1.12  | 96.4  | -0.09 | 109.8 | 0.54  |
| <b>UPF 1069</b>                          | 1048371-03-4 | free base     | PARP                      | 65.2  | -0.90 | 85.7  | -0.01 | 82.9  | -0.66 | 76.5  | -0.52 |
| <b>Urapidil HCl</b>                      | 64887-14-5   | hydrochloride | 5-HT Receptor             | 106.3 | 0.84  | 67.3  | -0.68 | 100.2 | 0.07  | 146.7 | 1.71  |
| <b>URB597</b>                            | 546141-08-6  | free base     | FAAH                      | 89.7  | 0.14  | 105.5 | 0.71  | 127.7 | 1.24  | 128.7 | 1.14  |
| <b>Valdecoxib</b>                        | 181695-72-7  | free base     | COX                       | 101.2 | 0.63  | 114.7 | 1.04  | 104.6 | 0.26  | 120.9 | 0.89  |
| <b>Valproic acid sodium salt (Sodium</b> | 1069-66-5    | free base     | Autophagy,HDAC,GABA       | 79.8  | -0.28 | 92.4  | 0.23  | 112.7 | 0.61  | 82.2  | -0.33 |

|                                      |              |                 |                          |       |       |       |       |       |       |       |       |  |
|--------------------------------------|--------------|-----------------|--------------------------|-------|-------|-------|-------|-------|-------|-------|-------|--|
| valproate)                           |              |                 | Receptor                 |       |       |       |       |       |       |       |       |  |
| <b>Valsartan</b>                     | 137862-53-4  | free base       | RAAS                     | 101.2 | 0.63  | 116.8 | 1.12  | 101.7 | 0.14  | 83.8  | -0.28 |  |
| <b>Vandetanib (ZD6474)</b>           | 443913-73-3  | free base       | VEGFR                    | 104.1 | 0.75  | 104.4 | 0.67  | 90.2  | -0.35 | 111.9 | 0.61  |  |
| <b>Vardenafil HCl Trihydrate</b>     | 224785-90-4  | hydrate         | PDE                      | 97.4  | 0.47  | 51.8  | -1.24 | 117.1 | 0.79  | 143.1 | 1.59  |  |
| <b>Varespladib (LY315920)</b>        | 172732-68-2  | free base       | Phospholipase (e.g. PLA) | 86.5  | 0.00  | 109.7 | 0.86  | 99.1  | 0.03  | 109.2 | 0.52  |  |
| <b>Varlitinib</b>                    | 845272-21-1  | free base       | EGFR                     | 76.1  | -0.44 | 113.5 | 1.00  | 112.9 | 0.61  | 151.7 | 1.87  |  |
| <b>Vatalanib (PTK787) 2HCl</b>       | 212141-51-0  | dihydrochloride | c-Kit,VEGFR              | 90.5  | 0.17  | 100.9 | 0.54  | 99.6  | 0.05  | 108.1 | 0.48  |  |
| <b>WAY-100635 Maleate</b>            | 1092679-51-0 | hydrochloride   | 5-HT Receptor            | 107.0 | 0.87  | 114.6 | 1.04  | 116.3 | 0.76  | 107.5 | 0.47  |  |
| <b>WAY-600</b>                       | 1062159-35-6 | free base       | mTOR                     | 57.3  | -1.23 | 113.5 | 1.00  | 91.0  | -0.32 | 98.8  | 0.19  |  |
| <b>VE-821</b>                        | 1232410-49-9 | free base       | ATM/ATR                  | 83.0  | -0.15 | 56.8  | -1.06 | 104.9 | 0.27  | 100.4 | 0.24  |  |
| <b>VE-822</b>                        | 1232416-25-9 | free base       | ATM/ATR                  | 83.8  | -0.11 | 45.3  | -1.48 |       |       | 33.8  | -1.87 |  |
| <b>Veliparib (ABT-888)</b>           | 912444-00-9  | free base       | PARP                     | 114.6 | 1.19  | 106.7 | 0.75  | 93.3  | -0.22 | 51.0  | -1.32 |  |
| <b>Vemurafenib (PLX4032, RG7204)</b> | 918504-65-1  | free base       | Raf                      | 110.9 | 1.04  | 66.2  | -0.72 | 184.8 | 3.67  | 86.8  | -0.19 |  |
| <b>Venlafaxine</b>                   | 99300-78-4   | hydrochloride   | 5-HT Receptor            | 76.3  | -0.43 | 92.2  | 0.22  | 106.8 | 0.35  | 99.1  | 0.20  |  |
| <b>VER-49009</b>                     | 940289-57-6  | free base       | HSP90                    | 48.1  | -1.62 | 89.2  | 0.12  | 57.1  | -1.76 | 73.4  | -0.61 |  |
| <b>VER-50589</b>                     | 747413-08-7  | free base       | HSP (e.g. HSP90)         | 49.5  | -1.57 | 36.3  | -1.81 | 40.0  | -2.48 | 50.7  | -1.33 |  |
| <b>WH-4-023</b>                      | 837422-57-8  | free base       | Src                      | 95.1  | 0.37  | 66.9  | -0.70 | 109.5 | 0.47  | 111.2 | 0.58  |  |
| <b>WHI-P154</b>                      | 211555-04-3  | free base       | JAK,EGFR                 | 80.7  | -0.24 | 114.4 | 1.03  | 105.8 | 0.31  | 105.6 | 0.40  |  |
| <b>WIKI4</b>                         | 838818-26-1  | free base       | Wnt/beta-catenin         | 119.1 | 1.38  | 107.1 | 0.77  | 98.3  | -0.01 | 89.8  | -0.09 |  |
| <b>Vildagliptin (LAF-237)</b>        | 274901-16-5  | free base       | DPP-4                    | 103.5 | 0.72  | 119.3 | 1.21  | 112.9 | 0.61  | 125.5 | 1.04  |  |
| <b>Vinorelbine Tartrate</b>          | 125317-39-7  | Salt            | Microtubule Associat     | 49.9  | -1.55 | 51.4  | -1.26 | 48.7  | -2.11 | 23.9  | -2.18 |  |
| <b>Vismodegib (GDC-0449)</b>         | 879085-55-9  | free base       | Hedgehog/Smoothened      | 91.8  | 0.23  | 86.1  | 0.00  | 103.5 | 0.21  | 107.0 | 0.45  |  |
| <b>Wnt-C59 (C59)</b>                 | 1243243-89-1 | free base       | Wnt/beta-catenin         | 85.4  | -0.04 | 73.5  | -0.46 | 88.5  | -0.42 | 117.3 | 0.78  |  |
| <b>Wnt-C59 (C59)</b>                 | 1243243-89-1 | free base       | Wnt/beta-catenin         | 92.7  | 0.26  | 62.6  | -0.85 | 81.6  | -0.72 | 119.7 | 0.85  |  |
| <b>Volasertib (BI 6727)</b>          | 755038-65-4  | free base       | PLK                      | 54.5  | -1.35 | 43.5  | -1.55 | 33.8  | -2.75 | 6.1   | -2.75 |  |
| <b>Voreloxin (SNS-595)</b>           | 175414-77-4  | free base       | Topoisomerase            | 52.5  | -1.44 | 71.9  | -0.51 | 96.7  | -0.07 | 66.5  | -0.83 |  |
| <b>Voriconazole</b>                  | 137234-62-9  | free base       | P450 (e.g. CYP17)        | 71.6  | -0.63 | 113.0 | 0.98  | 100.5 | 0.08  | 93.5  | 0.02  |  |
| <b>Vorinostat (SAHA, MK0683)</b>     | 149647-78-9  | free base       | Autophagy,HDAC           | 71.2  | -0.64 | 68.1  | -0.65 | 92.3  | -0.26 | 14.5  | -2.48 |  |

|                                      |                         |              |                        |       |       |       |       |       |       |       |       |
|--------------------------------------|-------------------------|--------------|------------------------|-------|-------|-------|-------|-------|-------|-------|-------|
| <b>Vortioxetine (Lu AA21004) HBr</b> | 960203-27-4             | hydrobromide | 5-HT Receptor          | 76.3  | -0.43 | 62.3  | -0.86 | 102.4 | 0.17  | 138.8 | 1.46  |
| <b>Wortmannin</b>                    | 19545-26-7              | free base    | Autophagy,ATM/ATR,PI3K | 85.4  | -0.04 | 107.7 | 0.79  | 127.8 | 1.25  | 123.1 | 0.96  |
| <b>WP1066</b>                        | 857064-38-1             | free base    | JAK                    | 96.0  | 0.41  | 102.5 | 0.60  | 101.5 | 0.13  | 102.1 | 0.30  |
| <b>VS-5584 (SB2343)</b>              | 1246560-33-7            | free base    | PI3K                   | 35.0  | -2.18 | 43.7  | -1.54 | 45.5  | -2.25 | 48.2  | -1.41 |
| <b>VU 0357121</b>                    | 433967-28-3             | free base    | GluR                   | 96.5  | 0.43  | 91.4  | 0.19  | 103.5 | 0.22  | 107.8 | 0.48  |
| <b>VU 0361737</b>                    | 1161205-04-4            | free base    | GluR                   | 108.4 | 0.93  | 114.5 | 1.04  | 109.5 | 0.47  | 105.9 | 0.41  |
| <b>VU 0364439</b>                    | 1246086-78-1            | free base    | GluR                   | 101.9 | 0.66  | 63.9  | -0.80 | 103.4 | 0.21  | 115.9 | 0.73  |
| <b>VU 0364770</b>                    | 61350-00-3              | free base    | GluR                   | 83.8  | -0.11 | 113.5 | 1.00  | 124.5 | 1.11  | 113.4 | 0.65  |
| <b>VUF 10166</b>                     | 155584-74-0             | free base    | 5-HT Receptor          | 88.6  | 0.09  | 114.4 | 1.03  | 107.2 | 0.37  | 113.0 | 0.64  |
| <b>VX-222 (VCH-222, Lomibuvir)</b>   | 1026785-59-0            | free base    | HCV Protease           | 101.2 | 0.63  | 110.5 | 0.89  | 110.6 | 0.51  | 86.9  | -0.19 |
| <b>VX-661</b>                        | 1152311-62-0            | free base    | CFTR                   | 79.1  | -0.31 | 74.5  | -0.42 | 105.6 | 0.30  | 107.1 | 0.45  |
| <b>VX-680 (Tozasertib, MK-0457)</b>  | 639089-54-6             | free base    | Aurora Kinase          | 62.0  | -1.03 | 62.2  | -0.87 | 46.2  | -2.22 | 76.1  | -0.53 |
| <b>VX-702</b>                        | 745833-23-2             | free base    | p38 MAPK               | 91.8  | 0.23  | 56.2  | -1.08 | 81.0  | -0.74 | 88.8  | -0.13 |
| <b>VX-745</b>                        | 209410-46-8             | free base    | p38 MAPK               | 72.7  | -0.58 | 112.3 | 0.95  | 95.3  | -0.14 | 83.9  | -0.28 |
| <b>VX-765</b>                        | 273404-37-8,851091-96-8 | free base    | Caspase                | 104.7 | 0.78  | 54.7  | -1.14 | 93.3  | -0.22 | 91.0  | -0.06 |
| <b>VX-809 (Lumacaftor)</b>           | 936727-05-8             | free base    | CFTR                   | 116.1 | 1.26  | 101.5 | 0.56  | 111.8 | 0.57  | 77.1  | -0.50 |
| <b>WY-14643 (Pirinixic Acid)</b>     | 50892-23-4              | free base    | PPAR                   | 81.9  | -0.19 | 63.8  | -0.81 | 104.3 | 0.25  | 129.9 | 1.18  |
| <b>WYE-125132 (WYE-132)</b>          | 1144068-46-1            | free base    | mTOR                   | 56.2  | -1.28 | 70.6  | -0.56 | 41.7  | -2.41 | 39.9  | -1.68 |
| <b>WYE-354</b>                       | 1062169-56-5            | free base    | mTOR                   | 92.2  | 0.25  | 112.3 | 0.96  | 98.8  | 0.01  | 74.3  | -0.59 |
| <b>WZ3146</b>                        | 1214265-56-1            | free base    | EGFR                   | 102.5 | 0.68  | 89.2  | 0.12  | 91.7  | -0.29 | 60.6  | -1.02 |
| <b>WZ4002</b>                        | 1213269-23-8            | free base    | EGFR                   | 117.3 | 1.31  | 79.2  | -0.25 | 107.6 | 0.39  | 95.8  | 0.09  |
| <b>WZ4003</b>                        | 1214265-58-3            | free base    | AMPK                   | 123.7 | 1.58  | 78.5  | -0.27 | 104.4 | 0.25  | 100.1 | 0.23  |
| <b>WZ8040</b>                        | 1214265-57-2            | free base    | EGFR                   | 97.1  | 0.45  | 75.5  | -0.38 | 122.9 | 1.04  | 79.1  | -0.44 |
| <b>WZ811</b>                         | 55778-02-4              | free base    | CXCR                   | 75.3  | -0.47 | 58.5  | -1.00 | 101.8 | 0.14  | 108.6 | 0.50  |
| <b>XAV-939</b>                       | 284028-89-3             | free base    | Wnt/beta-catenin       | 93.5  | 0.30  | 69.2  | -0.61 | 107.8 | 0.40  | 91.3  | -0.05 |
| <b>XL019</b>                         | 945755-56-6             | free base    | JAK                    | 76.0  | -0.44 | 112.4 | 0.96  | 87.9  | -0.45 | 110.9 | 0.57  |
| <b>XL019</b>                         | 945755-56-6             | free base    | JAK                    | 68.7  | -0.75 | 60.9  | -0.91 | 86.6  | -0.50 | 118.6 | 0.82  |
| <b>XL147</b>                         | 956958-53-5             | free base    | PI3K                   | 116.1 | 1.26  | 115.1 | 1.06  | 108.0 | 0.40  | 85.0  | -0.25 |

|                                     |              |                |                       |       |       |       |       |       |       |       |       |
|-------------------------------------|--------------|----------------|-----------------------|-------|-------|-------|-------|-------|-------|-------|-------|
| <b>XL335</b>                        | 629664-81-9  | free base      | FXR                   | 85.2  | -0.05 | 114.6 | 1.04  | 114.9 | 0.70  | 107.3 | 0.46  |
| <b>XL888</b>                        | 1149705-71-4 | free base      | HSP (e.g. HSP90)      | 45.1  | -1.75 | 30.8  | -2.01 |       |       | 40.1  | -1.67 |
| <b>XMD8-92</b>                      | 1234480-50-2 | free base      | ERK                   | 68.8  | -0.75 | 75.8  | -0.37 | 94.4  | -0.17 | 73.3  | -0.62 |
| <b>Xylazine HCl</b>                 | 23076-35-9   | hydrochloride  | Adrenergic Receptor   | 91.8  | 0.23  | 115.5 | 1.07  | 144.9 | 1.97  | 131.2 | 1.22  |
| <b>Y-27632 2HCl</b>                 | 129830-38-2  | dihydrochloric | Autophagy,ROCK        | 112.7 | 1.11  | 107.7 | 0.79  | 74.4  | -1.02 | 118.9 | 0.83  |
| <b>YH239-EE</b>                     | 1364488-67-4 | free base      | Mdm2                  | 126.0 | 1.68  | 107.4 | 0.78  | 108.8 | 0.44  | 84.7  | -0.26 |
| <b>YM155 (Sepantronium Bromide)</b> | 781661-94-7  | bromide        | Survivin              | 35.2  | -2.17 | 1.9   | -3.06 | 2.1   | -4.09 | 0.4   | -2.93 |
| <b>YM201636</b>                     | 371942-69-7  | free base      | PI3K                  | 89.9  | 0.15  | 90.5  | 0.16  | 95.6  | -0.12 | 74.5  | -0.58 |
| <b>YO-01027</b>                     | 209984-56-5  | free base      | Gamma-secretase       | 87.8  | 0.06  | 55.8  | -1.10 | 138.9 | 1.72  | 116.9 | 0.76  |
| <b>Zalcitabine</b>                  | 7481-89-2    | free base      | Reverse Transcriptase | 125.8 | 1.67  | 109.4 | 0.85  | 97.5  | -0.04 | 95.3  | 0.08  |
| <b>Zaltoprofen</b>                  | 74711-43-6   | free base      | COX                   | 130.8 | 1.88  | 115.4 | 1.07  | 112.6 | 0.60  | 121.9 | 0.92  |
| <b>ZCL278</b>                       | 587841-73-4  | free base      | Rac                   | 91.4  | 0.21  | 116.7 | 1.12  | 109.5 | 0.47  | 107.8 | 0.47  |
| <b>Zebularine</b>                   | 3690-10-6    | free base      | DNA Methyltransferase | 70.3  | -0.68 | 52.3  | -1.22 |       |       | 94.1  | 0.04  |
| <b>Z-FA-FMK</b>                     | 197855-65-5  | free base      | Cysteine Protease     | 136.5 | 2.12  | 106.8 | 0.76  | 115.0 | 0.70  | 106.5 | 0.43  |
| <b>Zibotentan (ZD4054)</b>          | 186497-07-4  | free base      | Endothelin Receptor   | 105.0 | 0.79  | 112.8 | 0.97  | 108.9 | 0.44  | 67.1  | -0.81 |
| <b>Zidovudine</b>                   | 30516-87-1   | free base      | Reverse Transcriptase | 109.8 | 0.99  | 116.3 | 1.10  | 114.4 | 0.68  | 94.5  | 0.05  |
| <b>Zinc Pyrithione</b>              | 13463-41-7   | free base      | Proton Pump           | 118.8 | 1.37  | 109.4 | 0.85  | 109.8 | 0.48  | 62.1  | -0.97 |
| <b>ZM 306416</b>                    | 690206-97-4  | free base      | VEGFR                 | 81.1  | -0.22 | 114.8 | 1.05  | 98.0  | -0.02 | 115.4 | 0.72  |
| <b>ZM 323881 HCl</b>                | 193000-39-4  | hydrochloride  | VEGFR                 | 96.0  | 0.41  | 114.0 | 1.02  | 95.5  | -0.12 | 94.6  | 0.06  |
| <b>ZM 336372</b>                    | 208260-29-1  | free base      | Raf                   | 72.6  | -0.58 | 74.2  | -0.43 | 111.2 | 0.54  | 128.3 | 1.13  |
| <b>ZM 39923 HCl</b>                 | 1021868-92-7 | hydrochloride  | JAK                   | 60.3  | -1.11 | 61.8  | -0.88 | 92.9  | -0.24 | 79.1  | -0.44 |
| <b>ZM 447439</b>                    | 331771-20-1  | free base      | Aurora Kinase         | 100.5 | 0.60  | 77.3  | -0.32 | 74.5  | -1.02 | 93.8  | 0.03  |
| <b>Zolmitriptan</b>                 | 139264-17-8  | free base      | 5-HT Receptor         | 87.6  | 0.05  | 115.2 | 1.06  | 97.6  | -0.03 | 94.4  | 0.05  |
| <b>Zosuquidar (LY335979) 3HCl</b>   | 167465-36-3  | hydrochloride  | P-gp                  | 84.7  | -0.07 | 112.2 | 0.95  | 125.6 | 1.15  | 90.4  | -0.08 |
| <b>Zotarolimus(ABT-578)</b>         | 221877-54-9  | free base      | mTOR                  | 63.7  | -0.96 | 81.6  | -0.16 |       |       | 71.5  | -0.68 |
| <b>ZSTK474</b>                      | 475110-96-4  | free base      | PI3K                  | 51.6  | -1.48 | 94.9  | 0.32  | 63.0  | -1.51 | 90.4  | -0.08 |
| <b>Z-VAD-FMK</b>                    | 187389-52-2  | free base      | Caspase               | 92.5  | 0.26  | 66.1  | -0.72 | 79.1  | -0.82 | 99.9  | 0.22  |
